# Supplementary material for: Low Incidence of Renal Dysfunction among HIV-Infected Patients on a Tenofovir-Based First Line Antiretroviral Treatment Regimen in Myanmar
Source: PLoS One. 2015 Aug 24;10(8):e0135188. doi: 10.1371/journal.pone.0135188 (PMC4547764; doi:10.1371/journal.pone.0135188)
Supplement: S1 Dataset — (XLSX) [file pone.0135188.s001.xlsx]

## Sheet: Sheet1
nid	gender	fstdatv	tdfstdt	age	height	weight	bmi	t0arv	artho	d4tho	hohyp	hodm	horenalds	hotyreanld	hodrug	tydrug	tydrug2	tydrug3	tydrug4	tydrug5	t0hbsag	t0cd4	t0hivload	t0creatui	t0creatcl	whofd	hbsag	hepc	drugcu	drug1	drug2	drug3	drug4	drug5	drug6	renalcu	tyrenalcu	dm	hyp	tdfsp	whytdfsp	tdfspdt	dead	trft	outcome	outcdt	dur3	t0cd4grp	examen1
1001	0	2006-03-20	2013-05-16	41	154	46	19.4	3TC+D4T30+NVP	1	1	0	0	9		1	2	2	1	2	2	9	689	9999999	57.52	82.34	3	9	9	2	0	0	0	0	0	0	2		0	0	2	0	1900-01-02	2	2	1	2014-07-01	411	3	2006-03-16
1004	0	2006-03-23	2013-09-04	38	146	43.5	20.41	3TC+D4T30+NVP	1	1	0	0	2		1	2	2	1	2	2	0	241	0	83.19	55.47	4	2	2	1	2	2	1	2	2	2	2		0	0	2	0	1900-01-02	2	2	1	2014-07-01	300	3	2006-03-22
1008	1	2006-03-28	2013-03-25	41	173	67	22.39	3TC+D4T30+NVP	1	1	0	0	2		1	2	2	1	2	2	0	655	0	127.44	64.02	2	9	9	2	0	0	0	0	0	0	2		0	0	2	0	1900-01-02	2	2	1	2014-07-01	463	3	2006-03-23
1009	0	2006-03-29	2012-08-23	35	157	54	21.91	3TC+D4T30+EFV600	1	1	0	0	2		1	2	2	1	2	2	0	705	0	61.06	96.57	3	2	9	2	0	0	0	0	0	0	2		0	0	2	0	1900-01-02	2	2	1	2014-07-01	677	3	2006-05-03
1014	1	2006-03-30	2012-11-29	31	166	55	19.96	3TC+D4T30+EFV600	1	1	0	0	2		1	2	2	1	2	2	9	749	0	112.39	64.4	4	1	9	2	0	0	0	0	0	0	2		0	0	2	0	1900-01-02	2	2	1	2014-07-01	579	3	2006-03-28
1016	0	2006-03-30	2012-11-12	47	173	68	22.72	3TC+D4T30+NVP	1	1	1	0	2		1	2	2	1	2	2	9	401	0	108.85	60.42	3	9	9	2	0	0	0	0	0	0	2		0	1	2	0	1900-01-02	2	2	1	2014-07-01	596	3	2006-03-30
1030	0	2006-04-05	2012-12-31	15	146	42	19.7	3TC+D4T30+NVP	1	1	0	0	2		1	2	2	1	2	2	0	812	0	55.75	97.94	4	2	9	2	0	0	0	0	0	0	2		0	0	2	0	1900-01-02	2	2	1	2014-07-01	547	3	2006-04-03
1033	1	2006-04-07	2013-05-28	43	166	55	19.96	3TC+D4T30+EFV600	1	1	0	0	2		1	2	2	1	1	2	0	410	0	58.41	112.34	4	9	9	2	0	0	0	0	0	0	2		0	0	2	0	1900-01-02	2	2	1	2014-07-01	399	3	2006-04-05
1034	0	2006-04-10	2012-02-20	37	150	43.5	19.33	3TC+D4T30+NVP	1	1	0	0	2		1	2	2	1	2	2	0	635	0	74.3	62.71	3	2	9	2	0	0	0	0	0	0	2		0	0	2	0	1900-01-02	2	2	1	2014-07-01	862	3	2006-04-07
1037	0	2006-04-10	2012-08-09	40	155	51	21.23	3TC+D4T30+EFV600	1	1	1	0	9		1	2	2	1	2	2	0	1302	0	92.4	57.4	4	2	9	2	0	0	0	0	0	0	2		0	1	2	0	1900-01-02	2	2	6	2014-07-01	691	3	2006-04-06
1045	0	2006-04-21	2012-12-26	42	157	51.5	20.89	3TC+D4T30+NVP	1	1	0	0	9		1	2	2	1	2	2	0	632	0	67.26	78.04	2	2	9	2	0	0	0	0	0	0	2		0	0	2	0	1900-01-02	2	2	1	2014-07-01	552	3	2006-04-19
1051	0	2006-04-21	2013-02-25	36	151	56	24.56	3TC+D4T30+EFV600	1	1	0	0	2		1	2	2	1	2	2	9	604	9999999	89.38	67.77	3	9	9	2	0	0	0	0	0	0	2		0	0	2	0	1900-01-02	2	2	1	2014-07-01	491	3	2006-04-19
1053	1	2006-04-24	2012-11-22	46	165	57	20.94	3TC+D4T30+NVP	1	1	0	0	2		1	2	2	1	2	2	0	439	0	96.46	68.32	3	9	2	2	0	0	0	0	0	0	2		0	0	2	0	1900-01-02	2	2	1	2014-07-01	586	3	2006-04-20
1062	1	2006-04-27	2013-09-04	40	159	55	21.76	3TC+D4T30+EFV600	1	1	1	0	2		1	2	2	1	2	2	0	356	0	93.81	72.11	3	9	9	2	0	0	0	0	0	0	2		0	0	2	0	1900-01-02	2	2	1	2014-07-01	300	3	2006-04-25
1068	1	2006-05-02	2013-09-23	30	157	50	20.28	3TC+D4T30+EFV600	1	1	0	0	2		1	1	2	1	2	2	0	703	0	65.49	103.3	4	9	9	2	0	0	0	0	0	0	2		0	0	2	0	1900-01-02	2	2	1	2014-07-01	281	3	2006-05-08
1075	1	2006-05-04	2013-09-04	51	157	82	33.27	3TC+D4T30+EFV600	1	1	1	0	2		1	2	2	1	2	2	0	711	0	112.3	79.93	3	9	2	2	0	0	0	0	0	0	2		0	1	2	0	1900-01-02	2	2	1	2014-07-01	300	3	2006-05-02
1079	1	2006-05-04	2012-03-13	50	166	66	23.95	3TC+D4T30+EFV600	1	1	1	0	2		2	0	0	0	0	0	9	620	9999999	103.5	70.59	4	2	9	2	0	0	0	0	0	0	2		0	0	2	0	1900-01-02	2	2	1	2014-07-01	840	3	2006-05-02
1088	1	2006-05-15	2012-09-20	36	163	53	19.95	3TC+D4T30+EFV600	1	1	0	0	2		1	2	2	1	2	2	9	226	121	130.09	52.12	4	9	9	1	2	2	1	2	2	2	2		0	0	2	0	1900-01-02	2	2	1	2014-07-01	649	3	2006-05-10
1092	0	2006-05-16	2013-12-09	32	159	43	17.01	3TC+EFV600+TDF	0	2	0	0	2		1	2	2	1	2	2	9	137	9999999	97.35	49.61	2	9	9	1	2	2	1	2	2	2	2		0	0	2	0	1900-01-02	2	2	1	2014-07-01	204	2	2006-05-11
1093	1	2006-05-16	2013-02-25	39	159	54	21.36	3TC+D4T30+EFV600	1	1	0	0	2		1	2	2	1	2	2	9	319	0	84.96	78.96	3	9	9	2	0	0	0	0	0	0	2		0	0	2	0	1900-01-02	2	2	1	2014-07-01	491	3	2006-05-15
1100	1	2006-05-17	2013-12-30	44	163	47	17.69	3TC+D4T30+NVP	1	1	0	0	2		1	2	2	1	2	2	0	1025	0	66.71	83.19	4	9	9	2	0	0	0	0	0	0	2		0	0	2	0	1900-01-02	2	2	1	2014-07-01	183	3	2006-07-24
1101	1	2006-05-18	2012-12-05	34	151	55	24.12	EFV600+FTC+TDF	0	2	0	0	2		1	2	2	1	2	2	1	249	9999999	101.8	70.44	2	1	9	1	2	2	1	2	2	2	2		0	0	2	0	1900-01-02	2	2	1	2014-07-01	573	3	2006-05-15
1106	1	2006-05-23	2012-09-20	40	162	46	17.53	3TC+D4T30+NVP	1	1	0	0	2		1	2	2	1	2	2	9	519	138	80.5	70.29	3	2	9	2	0	0	0	0	0	0	2		0	0	2	0	1900-01-02	2	2	1	2014-07-01	649	3	2006-05-17
1108	0	2006-05-24	2013-08-29	48	152	46	19.91	3TC+D4T30+EFV600	1	1	0	0	9		1	2	2	1	1	2	0	1330	0	67.26	65.44	4	2	2	2	0	0	0	0	0	0	2		0	0	2	0	1900-01-02	2	2	1	2014-07-01	306	3	2006-05-22
1120	0	2006-05-31	2012-11-26	50	158	37	14.82	3TC+D4T30+NVP	1	1	0	0	9		1	2	2	1	2	2	9	980	0	61.06	56.72	3	2	9	2	0	0	0	0	0	0	2		0	0	2	0	1900-01-02	2	2	1	2014-07-01	582	3	2006-05-29
1124	0	2006-05-31	2013-07-04	44	150	47	20.89	3TC+D4T30+NVP	1	1	0	0	2		1	2	2	1	2	2	0	603	0	82.31	57.01	3	2	9	2	0	0	0	0	0	0	2		0	0	2	0	1900-01-02	2	2	1	2014-07-01	362	3	2006-05-26
1127	1	2006-05-31	2012-08-07	49	156	50.5	20.75	EFV600+FTC+TDF	0	2	0	0	2		1	2	2	1	2	2	0	224	9999999	83.2	67.94	2	2	9	1	2	2	1	2	2	2	2		0	0	2	0	1900-01-02	2	2	1	2014-07-01	693	3	2008-07-07
113	1	2004-10-25	2013-11-18	42	161	62	23.92	3TC+D4T+EFV600	1	1	0	9	2		1	2	2	1	2	2	0	631	9999999	145.14	51.49	3	9	9	2	0	0	0	0	0	0	2		1	0	2	0	1900-01-02	2	2	1	2014-07-01	225	3	2004-10-22
1130	1	2006-06-01	2013-09-19	31	166	71	25.77	3TC+D4T30+EFV600	1	1	1	0	2		1	2	2	1	2	2	0	830	0	95.58	99.59	4	9	9	2	0	0	0	0	0	0	2		0	1	2	0	1900-01-02	2	2	1	2014-07-01	285	3	2006-05-30
1131	0	2006-06-02	2013-12-18	46	150	43	19.11	3TC+EFV600+TDF	0	2	0	0	2		2	2	2	2	2	2	1	431	9999999	43.37	96.93	1	1	2	2	0	0	0	0	0	0	2		0	0	2	0	1900-01-02	2	2	1	2014-07-01	195	3	2006-06-01
1132	1	2006-06-02	2012-06-06	50	152	33	14.28	3TC+D4T30+NVP	1	1	0	0	2		1	2	2	1	2	2	9	573	9999999	66.37	55.04	3	2	9	2	0	0	0	0	0	0	1	?drug induced	0	0	1	1	2013-11-18	2	2	5	2013-11-18	530	3	2006-06-02
1147	0	2006-06-12	2013-12-19	30	159	62	24.52	3TC+D4T30+NVP	1	1	0	0	2		1	2	2	1	2	2	0	374	0	52.21	135.85	3	2	9	2	0	0	0	0	0	0	2		0	0	2	0	1900-01-02	2	2	1	2014-07-01	194	3	2006-06-09
1149	1	2006-06-13	2012-10-08	44	166	74	26.85	3TC+D4T40+NVP	1	1	1	0	2		1	2	2	1	2	2	0	262	293500	113.28	77.14	4	9	9	2	0	0	0	0	0	0	2		0	1	2	0	1900-01-02	2	2	1	2014-07-01	631	3	2006-06-12
1153	1	2006-06-14	2013-05-07	35	170	54	18.69	3TC+D4T30+NVP	1	1	0	0	2		1	2	2	1	2	2	0	138	41675	93.81	74.34	4	2	2	2	0	0	0	0	0	0	2		0	0	2	0	1900-01-02	2	2	1	2014-07-01	420	2	2006-06-12
1158	1	2006-06-15	2012-09-25	34	171	68	23.26	3TC+D4T30+EFV600	1	1	0	0	2		1	2	2	1	1	2	0	559	0	127.44	69.57	4	2	1	2	0	0	0	0	0	0	2		0	0	2	0	1900-01-02	2	2	1	2014-07-01	644	3	2006-06-13
1163	0	2006-06-20	2012-08-23	35	148	41.5	18.95	3TC+D4T30+NVP	1	1	0	0	2		1	2	2	1	2	2	9	1196	0	87.61	51.73	2	2	9	2	0	0	0	0	0	0	2		0	0	2	0	1900-01-02	2	2	1	2014-07-01	677	3	2007-12-11
1166	0	2006-06-21	2013-05-28	53	165	61	22.41	3TC+D4T30+NVP	1	1	0	0	2		1	2	2	1	2	2	9	578	0	83.19	66.35	2	2	2	2	0	0	0	0	0	0	2		0	0	2	0	1900-01-02	1	2	4	2014-06-18	386	3	2006-06-15
1169	1	2006-06-22	2012-09-20	39	174	74	24.44	3TC+D4T40+NVP	1	1	1	0	2		1	2	2	1	2	2	9	378	0	123.01	74.73	3	2	2	1	2	2	1	2	2	2	2		0	0	2	0	1900-01-02	2	2	1	2014-07-01	649	3	2006-06-20
1173	1	2006-06-23	2013-10-23	45	161	56	21.6	3TC+D4T30+EFV600	1	1	0	0	2		1	2	2	1	2	2	0	308	0	94.69	69.11	4	9	9	2	0	0	0	0	0	0	2		0	0	2	0	1900-01-02	2	2	1	2014-07-01	251	3	2006-06-21
1178	0	2006-06-26	2013-05-10	32	164	51	18.96	3TC+D4T30+NVP	1	1	0	0	2		1	2	2	1	2	2	1	535	0	71.86	79.72	2	1	9	1	2	2	1	2	2	2	2		0	0	2	0	1900-01-02	2	2	1	2014-07-01	417	3	2008-02-19
1200	1	2006-07-13	2012-08-23	43	161	58	22.38	3TC+D4T30+NVP	1	1	0	0	2		1	2	2	1	2	2	9	503	0	108.85	63.57	3	2	1	2	0	0	0	0	0	0	2		0	0	2	0	1900-01-02	2	2	1	2014-07-01	677	3	2006-07-11
1204	1	2006-07-14	2013-05-29	37	163	52	19.57	3TC+D4T30+NVP	1	1	0	0	2		1	2	2	1	1	2	0	525	0	99.12	66.46	3	9	9	2	0	0	0	0	0	0	2		0	0	2	0	1900-01-02	2	2	1	2014-07-01	398	3	2006-06-12
1222	1	2006-07-24	2013-09-03	36	173	60	20.05	3TC+D4T30+NVP	1	1	0	0	2		1	2	2	1	2	2	0	445	0	115.93	66.21	4	9	9	2	0	0	0	0	0	0	2		0	0	2	0	1900-01-02	2	2	1	2014-07-01	301	3	2006-07-24
1223	1	2006-07-24	2012-07-24	37	176	60	19.37	3TC+D4T30+NVP	1	1	0	0	2		1	2	2	1	2	2	9	411	0	92.04	82.59	4	2	9	2	0	0	0	0	0	0	2		0	0	2	0	1900-01-02	2	2	1	2014-07-01	707	3	2006-07-20
1225	1	2006-07-26	2013-05-28	40	167	60	21.51	3TC+D4T30+EFV600	1	1	0	0	2		1	2	2	1	2	2	0	706	0	88.5	83.39	3	2	9	2	0	0	0	0	0	0	2		0	0	2	0	1900-01-02	2	2	1	2014-07-01	399	3	2006-08-02
1230	0	2006-07-31	2013-06-20	47	162	51	19.43	3TC+D4T30+NVP	1	1	0	0	2		1	2	2	1	2	2	0	846	0	87.61	56.3	2	2	9	2	0	0	0	0	0	0	2		0	0	2	0	1900-01-02	2	2	1	2014-07-01	376	3	2007-12-06
1233	1	2006-08-02	2012-12-28	46	161	47	18.13	3TC+D4T30+EFV600	1	1	0	0	2		2	0	0	0	0	0	9	484	0	89.39	60.79	3	9	9	2	0	0	0	0	0	0	2		0	0	2	0	1900-01-02	2	2	1	2014-07-01	550	3	2006-07-31
1235	1	2006-08-02	2013-03-05	39	151	38	16.67	3TC+D4T30+NVP	1	1	0	0	2		1	2	2	1	2	2	0	564	0	58.41	80.82	4	9	9	2	0	0	0	0	0	0	2		0	0	2	0	1900-01-02	2	2	1	2014-07-01	483	3	2006-07-31
1238	1	2006-08-03	2013-07-18	33	167	53	19	3TC+D4T30+EFV600	1	1	0	0	2		1	2	2	1	2	2	1	258	0	116.82	59.71	4	1	9	1	2	2	1	2	2	2	2		0	0	2	0	1900-01-02	2	2	1	2014-07-01	348	3	2006-08-01
1240	1	2006-08-02	2012-10-19	45	164	52	19.33	3TC+D4T30+EFV600	1	1	0	0	2		1	2	2	1	1	2	9	357	0	85.84	70.79	4	9	9	2	0	0	0	0	0	0	2		0	0	2	0	1900-01-02	2	2	6	2014-07-01	620	3	2006-08-01
1247	0	2006-08-09	2013-01-21	28	147	40	18.51	3TC+D4T30+NVP	1	1	0	0	2		1	2	2	1	2	2	0	772	0	46.02	101.24	3	2	9	2	0	0	0	0	0	0	2		0	0	2	0	1900-01-02	2	2	1	2014-07-01	526	3	2006-08-07
1249	0	2006-08-09	2013-08-26	34	144	50	24.11	3TC+EFV600+TDF	0	2	0	0	2		2	0	0	0	0	0	1	524	9999999	79.7	69.16	2	1	9	2	0	0	0	0	0	0	2		0	0	2	0	1900-01-02	2	2	1	2014-07-01	309	3	2006-07-11
1250	0	2006-08-09	2012-08-27	49	148	61	27.85	3TC+D4T30+EFV600	1	1	0	0	2		1	2	2	1	2	2	9	692	0	55.75	103.55	4	2	9	2	0	0	0	0	0	0	2		0	0	2	0	1900-01-02	2	2	1	2014-07-01	673	3	2006-08-07
1262	0	2006-08-16	2013-03-27	39	158	62	24.84	3TC+D4T30+NVP	1	1	0	0	2		1	2	2	1	2	2	0	605	0	65.49	99.44	1	2	9	2	0	0	0	0	0	0	2		0	0	2	0	1900-01-02	2	2	1	2014-07-01	461	3	2006-08-14
1266	0	2006-08-17	2013-12-12	32	155	46	19.15	3TC+D4T30+NVP	1	1	0	0	2		1	2	2	1	2	2	0	690	0	80.53	64.16	2	2	9	2	0	0	0	0	0	0	2		0	0	2	0	1900-01-02	2	2	1	2014-07-01	201	3	2008-03-19
1271	0	2006-08-22	2012-06-25	46	147	45	20.82	3TC+D4T30+NVP	1	1	0	0	2		1	2	2	1	2	2	9	271	0	57.52	76.48	3	1	2	1	2	2	1	2	2	2	2		0	0	2	0	1900-01-02	2	2	1	2014-07-01	736	3	2006-08-18
1287	0	2006-08-28	2013-09-03	35	157	59	23.94	3TC+D4T30+NVP	1	1	0	0	2		1	2	2	1	2	2	0	780	0	82.3	78.28	3	2	9	2	0	0	0	0	0	0	2		0	0	2	0	1900-01-02	2	2	1	2014-07-01	301	3	2006-08-23
129	1	2004-10-15	2012-12-17	52	166	46	16.69	3TC+D4T30+NVP	1	1	0	0	2		1	2	2	1	1	2	9	443	0	106.2	46.88	3	9	2	2	0	0	0	0	0	0	2		0	0	2	0	1900-01-02	2	2	1	2014-07-01	561	3	2004-10-22
1290	1	2006-08-28	2013-12-16	46	150	50	22.22	3TC+D4T30+NVP	1	1	0	0	2		1	2	2	1	2	2	0	1054	0	109.74	52.68	4	9	9	2	0	0	0	0	0	0	2		0	0	2	0	1900-01-02	2	2	1	2014-07-01	197	3	2006-08-24
1292	0	2006-08-28	2013-12-16	16	150	39	17.33	3TC+D4T30+EFV600	1	1	0	0	2		1	2	2	1	2	2	0	1683	0	58.41	86.11	3	2	9	2	0	0	0	0	0	0	2		0	0	2	0	1900-01-02	2	2	1	2014-07-01	197	3	2006-08-25
1302	1	2006-08-30	2012-10-08	27	166	60	21.77	3TC+AZT+NVP	1	2	0	0	2		1	2	2	1	2	2	0	105	9999999	110.62	75.39	2	9	2	2	0	0	0	0	0	0	2		0	0	2	0	1900-01-02	2	2	1	2014-07-01	631	2	2006-08-28
1303	1	2006-08-31	2013-05-22	34	171	59	20.18	3TC+D4T30+EFV600	1	1	0	0	2		1	2	2	1	2	2	9	849	0	87.61	87.8	3	2	9	2	0	0	0	0	0	0	2		0	0	2	0	1900-01-02	2	2	1	2014-07-01	405	3	2006-08-28
1305	0	2006-08-31	2012-08-08	30	143	45	22.01	3TC+D4T30+NVP	1	1	0	0	2		1	2	2	1	2	2	0	1056	0	0	76.11	3	2	9	2	0	0	0	0	0	0	2		0	0	2	0	1900-01-02	2	2	1	2014-07-01	692	3	2006-08-29
1307	1	2006-08-31	2013-04-30	42	171	56	19.15	3TC+D4T30+EFV600	1	1	0	0	2		1	2	2	1	2	2	9	462	0	95.58	70.62	4	9	9	2	0	0	0	0	0	0	2		0	0	2	0	1900-01-02	2	2	1	2014-07-01	427	3	2006-08-29
1314	0	2006-11-07	2012-12-03	37	174	64	21.14	3TC+D4T30+EFV600	1	1	0	0	2		1	2	2	1	2	2	0	424	0	93.81	73.08	3	2	9	1	2	2	1	2	2	2	2		0	0	2	0	1900-01-02	2	2	1	2014-07-01	575	3	2006-09-04
1315	0	2006-09-06	2013-09-24	37	159	56	22.15	3TC+D4T30+NVP	1	1	0	0	2		1	2	2	1	2	2	0	1580	0	79.65	75.31	3	2	2	2	0	0	0	0	0	0	2		0	0	2	0	1900-01-02	2	2	1	2014-07-01	280	3	2006-09-04
1319	1	2006-09-06	2012-01-18	35	173	61	20.38	3TC+D4T30+NVP	1	1	0	0	2		1	1	2	1	2	2	9	803	9999999	73.45	107.26	4	2	9	2	0	0	0	0	0	0	2		0	0	2	0	1900-01-02	2	2	1	2014-07-01	895	3	2006-09-05
1327	0	2006-09-11	2012-07-16	53	159	58	22.94	3TC+D4T30+NVP	1	1	1	0	2		1	2	2	1	2	2	9	1991	0	113.28	46.33	3	2	9	2	0	0	0	0	0	0	2		0	1	2	0	1900-01-02	2	2	1	2014-07-01	715	3	2006-09-07
1331	0	2006-09-13	2012-12-27	38	153	42	17.94	EFV600+FTC+TDF	0	2	0	0	2		1	2	2	1	2	2	0	348	9999999	61.1	72.92	2	2	2	1	2	2	2	2	2	1	2		0	0	2	0	1900-01-02	2	2	1	2014-07-01	551	3	2006-09-11
1348	1	2006-09-25	2013-10-09	28	168	64	22.68	3TC+D4T30+NVP	1	1	0	0	2		1	2	2	1	2	2	0	510	0	91.16	96.72	2	2	2	2	0	0	0	0	0	0	2		0	0	2	0	1900-01-02	2	2	1	2014-07-01	265	3	2006-09-20
1353	1	2006-09-26	2013-06-19	42	164	58	21.56	3TC+D4T30+NVP	1	1	0	0	2		1	2	2	1	2	2	0	636	200	89.4	78.2	3	2	9	2	0	0	0	0	0	0	2		0	0	2	0	1900-01-02	2	2	1	2014-07-01	377	3	2006-09-19
1358	0	2006-09-28	2012-08-22	36	150	53	23.56	3TC+D4T30+NVP	1	1	0	0	2		1	2	2	1	2	2	9	653	0	69.91	82	3	2	2	2	0	0	0	0	0	0	2		0	0	2	0	1900-01-02	2	2	1	2014-07-01	678	3	2006-09-26
1361	0	2006-09-29	2013-06-11	51	161	51	19.68	3TC+D4T30+NVP	1	1	1	0	2		1	2	2	1	2	2	0	876	9999999	86.03	54.87	2	2	9	2	0	0	0	0	0	0	2		0	0	2	0	1900-01-02	2	2	1	2014-07-01	385	3	2006-09-27
1379	0	2006-10-16	2013-02-25	41	150	46	20.44	3TC+D4T30+NVP	1	1	0	0	2		1	2	2	1	2	2	9	831	0	47.79	99.1	4	1	9	2	0	0	0	0	0	0	2		0	0	2	0	1900-01-02	2	2	1	2014-07-01	491	3	2006-10-16
138	1	2004-12-15	2012-12-18	44	163	49	18.44	3TC+D4T+NVP	1	1	0	0	2		1	2	2	1	2	2	0	519	0	86.73	66.71	4	2	9	2	0	0	0	0	0	0	2		0	0	2	0	1900-01-02	2	2	1	2014-07-01	560	3	2004-12-22
1391	1	2006-10-25	2012-12-10	42	160	48	18.75	3TC+D4T30+EFV600	1	1	0	0	2		1	2	2	1	2	2	0	835	0	107.08	54.03	3	9	2	2	0	0	0	0	0	0	2		0	0	2	0	1900-01-02	2	2	1	2014-07-01	568	3	2006-10-23
1394	0	2006-10-27	2012-10-19	34	146	57	26.74	3TC+D4T30+NVP	1	1	0	0	2		1	2	2	1	2	2	1	516	0	57.52	109.24	3	1	2	2	0	0	0	0	0	0	2		0	0	2	0	1900-01-02	2	2	1	2014-07-01	620	3	2006-10-25
1396	1	2006-10-31	2013-12-12	15	153	38	16.23	3TC+D4T30+NVP	1	1	0	0	2		1	2	2	1	1	2	1	1013	0	45.13	129.46	3	1	9	2	0	0	0	0	0	0	2		0	0	2	0	1900-01-02	2	2	1	2014-07-01	201	3	2006-10-27
1400	1	2006-11-02	2013-01-22	38	151	46	20.17	3TC+D4T30+NVP	1	1	0	0	2		1	2	2	1	2	2	0	883	0	86.73	66.54	4	9	2	2	0	0	0	0	0	0	2		0	0	2	0	1900-01-02	2	2	1	2014-07-01	525	3	2006-10-31
1403	1	2006-11-08	2012-09-24	38	165	52	19.1	3TC+D4T30+NVP	1	1	0	0	2		1	2	2	1	2	2	9	399	0	103.54	63.01	3	2	2	2	0	0	0	0	0	0	2		0	0	2	0	1900-01-02	2	2	1	2014-07-01	645	3	2006-11-06
1407	1	2006-11-10	2012-10-16	35	167	49	17.57	3TC+D4T30+NVP	1	1	0	0	2		1	2	2	1	2	2	9	270	0	67.26	94.09	4	2	2	1	2	2	1	2	2	2	2		0	0	2	0	1900-01-02	2	2	1	2014-07-01	623	3	2006-11-08
1415	1	2006-11-15	2012-12-20	42	155	48	19.98	3TC+D4T30+EFV600	1	1	0	0	2		1	2	2	1	2	2	9	883	0	90.27	64.1	4	2	2	2	0	0	0	0	0	0	2		0	0	2	0	1900-01-02	2	2	1	2014-07-01	558	3	2006-11-13
1420	1	2006-11-17	2013-06-25	41	161	56	21.6	3TC+D4T30+EFV600	1	1	1	0	2		1	2	2	1	2	2	0	692	0	73.45	92.84	4	9	9	2	0	0	0	0	0	0	2		0	1	2	0	1900-01-02	2	2	1	2014-07-01	371	3	2006-11-13
1427	0	2006-11-21	2013-03-20	36	149	48	21.62	3TC+D4T30+NVP	1	1	0	0	2		1	2	2	1	2	2	0	318	0	92.04	56.41	2	2	9	1	2	2	1	2	2	2	2		0	0	2	0	1900-01-02	2	2	1	2014-07-01	468	3	2006-11-14
1443	1	2006-12-06	2013-03-20	50	154	57	24.03	3TC+D4T30+NVP	1	1	0	0	2		1	2	2	1	2	2	0	551	0	110.62	57.04	3	2	2	2	0	0	0	0	0	0	2		0	0	2	0	1900-01-02	2	2	1	2014-07-01	468	3	2006-12-06
1448	1	2006-12-11	2013-06-26	34	163	58	21.83	3TC+D4T30+NVP	1	1	0	0	2		1	2	2	1	2	2	0	385	0	73.45	102.95	3	9	9	2	0	0	0	0	0	0	2		0	0	2	0	1900-01-02	2	2	1	2014-07-01	370	3	2006-12-07
1449	1	2006-12-11	2013-10-23	44	160	64	25	3TC+D4T30+EFV600	1	1	1	0	2		1	2	2	1	2	2	0	354	0	90.27	83.72	4	9	2	2	0	0	0	0	0	0	2		0	1	2	0	1900-01-02	2	2	1	2014-07-01	251	3	2006-11-13
1454	0	2006-12-18	2012-08-28	38	160	63	24.61	3TC+D4T30+NVP	1	1	0	0	2		1	2	2	1	2	2	9	713	0	78.76	84.85	1	9	9	2	0	0	0	0	0	0	2		0	0	2	0	1900-01-02	2	2	1	2014-07-01	672	3	2006-12-11
1455	1	2006-12-20	2013-05-29	33	159	62	24.52	3TC+D4T40+EFV600	1	1	0	0	2		1	2	2	1	2	2	0	582	0	114.16	71.48	3	9	9	2	0	0	0	0	0	0	2		0	0	2	0	1900-01-02	2	2	1	2014-07-01	398	3	2006-12-18
1457	1	2006-12-21	2013-08-29	38	161	49	18.9	3TC+D4T30+EFV600	1	1	1	0	2		2	0	0	0	0	0	0	663	0	100.89	60.93	3	9	2	2	0	0	0	0	0	0	2		0	1	2	0	1900-01-02	2	2	1	2014-07-01	306	3	2006-12-18
1459	1	2006-12-21	2012-12-18	43	175	72	23.51	3TC+D4T30+NVP	1	1	0	0	2		2	0	0	0	0	0	0	179	0	115.93	74.1	4	9	9	2	0	0	0	0	0	0	2		0	0	2	0	1900-01-02	2	2	1	2014-07-01	560	2	2006-12-19
1461	0	2007-01-01	2012-02-17	34	155	53	22.06	3TC+D4T30+NVP	1	1	0	0	2		1	2	2	1	2	2	9	674	0	70.8	82.52	2	2	9	2	0	0	0	0	0	0	2		0	0	2	0	1900-01-02	2	2	1	2014-07-01	865	3	2006-12-27
1462	1	2007-01-01	2013-01-02	40	159	53	20.96	3TC+D4T30+NVP	1	1	0	0	2		1	2	2	1	2	2	0	407	9999999	118.59	54.97	4	9	1	2	0	0	0	0	0	0	2		0	0	2	0	1900-01-02	1	2	4	2013-04-12	100	3	2007-01-01
1463	1	2007-01-05	2013-11-12	25	161	57	21.99	3TC+D4T30+NVP	1	1	0	0	2		1	2	2	1	2	2	0	724	0	109.74	73.47	2	2	2	2	0	0	0	0	0	0	2		0	0	2	0	1900-01-02	2	2	1	2014-07-01	231	3	2006-12-28
1468	0	2007-01-10	2013-06-10	42	153	47	20.08	3TC+EFV600+TDF	0	2	0	0	2		2	0	0	0	0	0	0	794	9999999	55.75	85.92	2	2	9	2	0	0	0	0	0	0	2		0	0	2	0	1900-01-02	2	2	1	2014-07-01	386	3	2007-01-08
1475	1	2007-01-15	2013-09-02	33	165	51	18.73	3TC+D4T30+NVP	1	1	0	0	2		1	2	2	1	2	2	9	521	0	78.76	85.22	3	9	9	2	0	0	0	0	0	0	2		0	0	2	0	1900-01-02	2	2	1	2014-07-01	302	3	2007-01-15
1476	1	2007-01-16	2013-04-23	39	161	62	23.92	3TC+D4T30+NVP	1	1	0	0	2		1	2	2	1	2	2	0	795	0	132.75	58.02	3	9	1	2	0	0	0	0	0	0	2		0	0	2	0	1900-01-02	2	2	1	2014-07-01	434	3	2006-12-07
1481	1	2007-01-18	2013-10-09	41	161	52	20.06	3TC+D4T30+NVP	1	1	0	0	2		1	2	2	1	2	2	0	489	0	91.16	69.46	3	9	2	2	0	0	0	0	0	0	2		0	0	2	0	1900-01-02	2	2	1	2014-07-01	265	3	2006-12-13
1485	0	2007-01-24	2012-07-13	44	153	57	24.35	EFV600+FTC+TDF	0	2	0	0	2		1	2	2	1	2	2	1	273	9999999	74.3	76.59	3	1	9	2	0	0	0	0	0	0	2		0	0	2	0		1	1	4	2012-11-10	120	3	2007-01-22
1491	1	2007-01-26	2012-10-23	41	171	53	18.13	3TC+D4T30+NVP	1	1	0	0	2		1	2	2	1	2	2	0	570	9999999	75.22	85.8	3	9	9	2	0	0	0	0	0	0	2		0	0	2	0	1900-01-02	2	2	1	2014-07-01	616	3	2007-01-26
1492	0	2007-01-26	2012-08-27	41	153	55	23.5	3TC+D4T30+NVP	1	1	0	0	2		1	2	2	1	2	2	9	1030	100	91.15	62.13	3	2	2	2	0	0	0	0	0	0	2		0	0	2	0	1900-01-02	2	2	1	2014-07-01	673	3	2007-01-24
1494	1	2007-01-26	2013-09-17	42	162	55	20.96	3TC+D4T30+EFV600	1	1	1	0	2		1	2	2	1	2	2	0	384	0	96.47	68.72	4	9	2	2	0	0	0	0	0	0	2		0	1	2	0	1900-01-02	2	2	1	2014-07-01	287	3	2007-01-24
1500	0	2007-01-31	2013-01-17	38	152	47	20.34	3TC+D4T30+NVP	1	1	0	0	2		1	2	2	1	2	2	9	462	9999999	53.1	93.89	4	2	2	1	2	2	1	2	2	2	2		0	0	2	0	1900-01-02	2	2	1	2014-07-01	530	3	2007-01-29
1507	0	2007-02-01	2013-10-09	38	148	61	27.85	3TC+D4T30+NVP	1	1	0	0	2		1	2	2	1	2	2	9	1545	0	84.96	76.16	3	2	9	2	0	0	0	0	0	0	2		0	0	2	0	1900-01-02	2	2	1	2014-07-01	265	3	2007-01-30
1522	1	2007-02-19	2013-10-18	29	167	64	22.95	3TC+D4T30+EFV600	1	1	0	0	2		1	2	2	1	2	2	0	453	0	86.73	100.75	4	9	9	2	0	0	0	0	0	0	2		0	0	2	0	1900-01-02	2	2	1	2014-07-01	256	3	2007-02-09
1525	1	2007-02-20	2012-04-25	40	170	58	20.07	3TC+D4T30+NVP	1	1	0	0	2		1	2	2	1	2	2	1	289	9999999	110.6	64.5	3	1	9	1	2	2	1	2	2	1	2		0	0	2	0	1900-01-02	2	2	1	2014-07-01	797	3	2007-02-15
1531	1	2007-02-22	2013-06-07	35	154	48	20.24	3TC+D4T30+EFV600	1	1	0	0	2		1	2	2	1	1	2	0	689	0	82.3	75.32	3	9	9	2	0	0	0	0	0	0	2		0	0	0	0		2	2	2	2014-04-13	310	3	2007-02-16
1533	0	2007-02-23	2013-07-25	41	156	49	20.13	3TC+D4T30+NVP	1	1	1	0	2		1	2	2	1	2	2	0	868	0	56.64	89.07	3	2	9	2	0	0	0	0	0	0	2		0	1	2	0	1900-01-02	2	2	1	2014-07-01	341	3	2007-03-06
1535	0	2007-02-27	2012-08-27	47	157	69	27.99	3TC+D4T30+NVP	1	1	0	0	2		1	2	2	1	2	2	9	348	0	87.61	76.17	3	2	2	2	0	0	0	0	0	0	2		1	0	2	0	1900-01-02	2	2	1	2014-07-01	673	3	2007-02-23
1546	1	2007-03-12	2013-07-16	39	169	59	20.66	3TC+D4T30+NVP	1	1	1	0	2		1	2	2	1	2	2	0	731	0	122.13	60.01	3	9	9	2	0	0	0	0	0	0	2		0	1	2	0	1900-01-02	2	2	1	2014-07-01	350	3	2007-03-05
1548	1	2007-03-13	2013-12-17	45	165	51	18.73	3TC+D4T30+NVP	1	1	0	0	2		1	2	2	1	2	2	0	235	0	95.58	62.35	3	9	2	1	2	2	1	2	2	2	2		0	0	2	0	1900-01-02	2	2	1	2014-07-01	196	3	2007-03-27
155	0	2004-12-15	2012-08-31	45	152	49	21.21	3TC+D4T30+EFV600	1	1	1	0	2		1	2	2	1	2	2	0	358	0	90.27	53.63	3	2	2	1	2	2	2	1	2	2	2		0	1	2	0	1900-01-02	2	2	1	2014-07-01	669	3	2004-12-16
1562	1	2007-03-21	2013-03-25	36	162	56	21.34	3TC+D4T30+NVP	1	1	0	0	2		1	2	2	1	2	2	9	550	0	130.09	55.07	3	9	9	2	0	0	0	0	0	0	2		0	0	2	0	1900-01-02	2	2	1	2014-07-01	463	3	2007-03-19
1566	1	2007-03-23	2013-10-24	38	159	60	23.73	3TC+D4T30+EFV600	1	1	0	0	2		1	2	2	1	2	2	0	582	0	55.75	135.02	3	9	9	2	0	0	0	0	0	0	2		0	0	2	0	1900-01-02	2	2	1	2014-07-01	250	3	2007-03-21
1568	0	2007-03-27	2013-06-20	31	153	63	26.91	3TC+D4T30+NVP	1	1	0	0	2		1	2	2	1	2	2	0	897	0	65.49	109.05	3	2	9	2	0	0	0	0	0	0	2		0	0	2	0	1900-01-02	2	2	1	2014-07-01	376	3	2007-03-13
1572	1	2007-03-28	2013-11-28	50	158	45	18.03	3TC+D4T30+NVP	1	1	1	0	2		1	2	2	1	2	2	0	579	0	92.14	54.06	3	9	9	2	0	0	0	0	0	0	2		0	1	2	0	1900-01-02	2	2	1	2014-07-01	215	3	2007-03-26
1576	0	2007-03-30	2013-11-13	46	150	54	24	3TC+D4T30+NVP	1	1	0	0	2		1	2	2	1	2	2	9	335	0	72.57	72.74	2	9	9	1	2	2	1	2	2	2	2		0	0	2	0	1900-01-02	2	2	6	2014-07-01	230	3	2007-03-28
1583	0	2007-04-10	2012-07-20	39	154	50	21.08	3TC+D4T30+NVP	1	1	0	0	2		1	2	2	1	2	2	9	644	0	92.04	57.06	3	1	9	2	0	0	0	0	0	0	2		0	0	2	0	1900-01-02	2	2	1	2014-07-01	711	3	2007-04-09
1586	1	2007-04-12	2013-07-16	39	164	50	18.59	3TC+D4T30+EFV600	1	1	0	0	2		1	2	2	1	2	2	0	752	0	76.99	80.68	4	9	9	2	0	0	0	0	0	0	2		0	0	2	0	1900-01-02	2	2	1	2014-07-01	350	3	2007-04-10
1600	0	2007-04-26	2013-02-25	40	155	60	24.97	3TC+D4T30+NVP	1	1	0	0	2		1	2	2	1	2	2	0	223	0	68.14	91.58	4	2	9	1	2	2	1	2	2	2	2		0	0	2	0	1900-01-02	2	2	1	2014-07-01	491	3	2007-04-26
1607	1	2007-05-04	2012-08-07	29	164	58	21.56	3TC+D4T30+EFV600	1	1	0	0	2		1	2	2	1	2	2	0	732	0	76.11	104.04	3	2	9	2	0	0	0	0	0	0	2		0	0	2	0	1900-01-02	2	2	1	2014-07-01	693	3	2007-05-02
1613	1	2007-05-10	2012-08-28	40	162	60	22.86	3TC+D4T30+EFV600	1	1	0	0	2		1	2	2	1	2	2	9	613	0	118.59	62.23	4	2	2	2	0	0	0	0	0	0	2		0	0	2	0	1900-01-02	2	2	1	2014-07-01	672	3	2007-05-08
1615	1	2007-05-11	2013-08-09	34	153	50	21.36	3TC+D4T30+EFV600	1	1	0	0	2		1	2	2	1	2	2	9	330	0	77.88	83.71	4	9	1	1	2	2	1	2	2	2	2		0	0	2	0	1900-01-02	2	2	1	2014-07-01	326	3	2007-05-09
1618	1	2007-05-16	2013-06-13	38	163	57	21.45	3TC+D4T30+NVP	1	1	0	0	2		1	2	2	1	2	2	0	835	0	95.58	74.82	4	9	9	2	0	0	0	0	0	0	2		0	0	2	0	1900-01-02	2	2	1	2014-07-01	383	3	2007-05-16
1623	0	2007-05-23	2013-12-16	36	156	66	27.12	3TC+D4T30+NVP	1	1	0	0	2		1	2	2	1	2	2	9	764	0	49.56	144.04	4	9	2	2	0	0	0	0	0	0	2		0	0	2	0	1900-01-02	2	2	1	2014-07-01	197	3	2007-05-16
1631	0	2007-05-29	2013-11-25	30	152	54	23.37	3TC+D4T30+NVP	1	1	0	0	2		1	2	2	1	2	2	9	1116	0	64.6	95.63	3	2	2	2	0	0	0	0	0	0	2		0	0	2	0	1900-01-02	2	2	1	2014-07-01	218	3	2007-05-25
1635	1	2007-05-30	2013-07-23	46	163	69	25.97	3TC+D4T30+NVP	1	1	1	0	2		1	2	2	1	2	2	0	306	0	84.96	93.9	2	9	9	1	2	2	1	2	2	2	2		0	0	2	0	1900-01-02	2	2	1	2014-07-01	343	3	2007-05-29
1641	1	2007-06-04	2013-07-30	38	162	56	21.34	3TC+D4T30+NVP	1	1	0	0	2		1	2	2	1	2	2	9	339	0	87.61	80.19	2	9	2	1	2	2	1	2	2	2	2		0	0	2	0	1900-01-02	2	2	1	2014-07-01	336	3	2007-05-30
165	0	2004-11-10	2012-01-11	45	158	55	22.03	3TC+D4T30+NVP	1	1	0	0	2		1	2	2	1	2	2	9	1285	0	79.65	68.22	3	2	2	2	0	0	0	0	0	0	2		0	1	2	0	1900-01-02	2	2	1	2014-07-01	902	3	2004-11-30
1652	1	2007-06-14	2013-11-11	34	161	46	17.75	3TC+D4T30+EFV600	1	1	0	0	2		1	2	2	1	2	2	0	836	0	85.84	69.87	3	9	9	2	0	0	0	0	0	0	2		0	0	2	0	1900-01-02	2	2	6	2014-07-01	232	3	2007-06-11
1655	1	2007-06-18	2012-11-26	39	167	65	23.31	3TC+D4T30+NVP	1	1	0	0	2		1	2	2	1	1	2	0	683	0	58.41	138.25	4	9	9	2	0	0	0	0	0	0	2		0	0	2	0	1900-01-02	2	2	4	2013-01-14	49	3	2007-06-12
1656	0	2007-06-18	2012-11-22	43	152	54	23.37	3TC+D4T30+EFV600	1	1	0	0	2		1	2	2	1	2	2	9	701	0	94.69	57.53	3	2	2	2	0	0	0	0	0	0	2		0	0	2	0	1900-01-02	2	2	1	2014-07-01	586	3	2007-06-13
1657	1	2007-06-19	2013-11-21	31	152	45	19.48	3TC+D4T30+EFV600	1	1	0	0	2		1	2	2	1	1	2	0	275	0	58.41	103.29	4	9	2	1	2	2	1	2	2	2	2		0	0	2	0	1900-01-02	2	2	1	2014-07-01	222	3	2007-06-15
1660	1	2007-06-20	2012-12-31	40	162	51	19.43	3TC+D4T30+NVP	1	1	0	0	2		1	2	2	1	2	2	0	755	0	69.92	89.72	3	9	9	2	0	0	0	0	0	0	2		0	0	2	0	1900-01-02	2	2	1	2014-07-01	547	3	2007-06-18
1662	1	2007-06-25	2013-12-17	35	162	73	27.82	3TC+D4T30+NVP	1	1	0	0	2		1	2	2	1	2	2	0	1071	0	76.11	123.87	3	9	9	2	0	0	0	0	0	0	2		0	0	2	0	1900-01-02	2	2	1	2014-07-01	196	3	2007-06-20
1663	1	2007-06-26	2013-03-21	31	165	45	16.53	3TC+D4T30+EFV600	1	1	0	0	2		1	2	2	1	2	2	9	676	0	88.5	68.17	3	2	9	2	0	0	0	0	0	0	2		0	0	2	0	1900-01-02	2	2	1	2014-07-01	467	3	2007-06-21
1664	1	2007-06-29	2013-09-05	64	160	57	22.27	3TC+D4T30+NVP	1	1	1	0	2		1	2	2	1	2	2	0	607	0	99.12	53.76	3	9	9	2	0	0	0	0	0	0	2		0	1	2	0	1900-01-02	2	2	2	2014-07-01	299	3	2007-06-27
1667	1	2007-07-03	2013-11-25	33	168	55	19.49	3TC+D4T30+NVP	1	1	0	0	2		1	2	2	1	1	2	9	307	0	115.93	62.44	4	9	9	2	0	0	0	0	0	0	2		0	0	2	0	1900-01-02	2	2	1	2014-07-01	218	3	2007-06-28
1669	1	2007-07-05	2013-08-20	44	167	62	22.23	3TC+D4T30+NVP	1	1	0	0	2		1	2	2	1	2	2	0	498	9999999	115.93	63.15	2	9	9	2	0	0	0	0	0	0	2		0	0	2	0	1900-01-02	2	2	1	2014-07-01	315	3	2007-07-03
167	0	2004-12-17	2012-07-03	47	156	41	16.85	3TC+D4T30+NVP	1	1	0	0	2		1	2	2	1	2	2	0	316	9999999	53.1	74.68	3	2	2	2	0	0	0	0	0	0	2		0	0	2	0	1900-01-02	1	2	4	2012-11-13	133	3	2004-12-17
1671	0	2007-07-09	2013-09-03	34	148	42	19.17	3TC+D4T30+EFV600	1	1	0	0	2		1	2	2	1	2	2	0	548	0	79.65	58.13	4	2	2	2	0	0	0	0	0	0	2		0	0	2	0	1900-01-02	2	2	1	2014-07-01	301	3	2007-07-02
1672	1	2007-07-09	2012-08-16	36	0	49	0	3TC+D4T30+EFV600	1	1	0	0	2		1	2	2	1	2	2	0	150	0	94.69	66.2	4	9	9	1	2	2	1	2	2	2	2		0	0	2	0	1900-01-02	2	2	1	2014-07-01	684	2	2007-07-03
1676	0	2007-07-16	2013-01-14	35	143	43	21.03	EFV600+FTC+TDF	0	2	0	0	2		1	2	2	1	2	2	0	128	9999999	55.8	84.15	3	2	2	1	2	2	1	2	2	2	2		0	0	2	0	1900-01-02	2	2	1	2014-07-01	533	2	2007-06-06
1677	0	2007-07-12	2012-10-18	62	156	44	18.08	3TC+D4T30+NVP	1	1	1	0	2		1	2	2	1	2	2	9	425	0	59.29	60.2	3	9	2	1	2	2	1	2	2	2	2		0	1	2	0	1900-01-02	2	2	1	2014-07-01	621	3	2007-07-10
1680	1	2007-07-12	2013-05-02	29	164	53	19.71	3TC+D4T30+EFV600	1	1	0	0	2		1	2	2	1	2	2	0	213	0	106.2	68.14	3	9	9	1	2	2	1	2	2	2	1	normoglycemic glucosuria	0	0	2	0	1900-01-02	2	2	1	2014-07-01	425	3	2007-07-10
1681	1	2007-07-12	2013-05-30	36	163	50	18.82	3TC+D4T30+NVP	1	1	0	0	2		1	2	2	1	2	2	0	514	204	107.97	59.24	2	9	9	2	0	0	0	0	0	0	2		0	0	2	0	1900-01-02	2	2	1	2014-07-01	397	3	2008-01-29
1682	1	2007-07-12	2012-12-26	34	159	58	22.94	3TC+D4T30+EFV600	1	1	0	0	2		1	2	2	1	2	2	9	761	9999999	97.35	77.68	3	1	2	2	0	0	0	0	0	0	2		0	0	2	0	1900-01-02	1	1	4	2013-04-30	125	3	2007-07-11
1685	1	2007-07-17	2013-02-07	35	170	67	23.18	3TC+D4T30+NVP	1	1	0	0	2		1	2	2	1	2	2	0	665	0	72.58	119.22	3	9	9	2	0	0	0	0	0	0	2		0	0	2	0	1900-01-02	2	2	1	2014-07-01	509	3	2007-07-11
1687	1	2007-07-18	2013-02-19	49	154	46	19.4	3TC+D4T30+NVP	1	1	0	0	2		1	2	2	1	2	2	0	336	9999999	97.35	52.89	3	9	9	2	0	0	0	0	0	0	2		0	0	2	0	1900-01-02	2	2	6	2014-07-01	497	3	2007-07-16
1698	0	2007-07-25	2012-11-21	43	153	45	19.22	3TC+D4T30+NVP	1	1	1	0	2		1	2	2	1	2	2	9	911	0	83.19	54.57	1	2	9	2	0	0	0	0	0	0	2		0	1	2	0	1900-01-02	2	2	6	2014-07-01	587	3	2007-07-23
1699	1	2007-07-26	2013-03-25	43	160	52	20.31	3TC+D4T30+EFV600	1	1	1	1	2		1	2	2	1	2	2	1	362	0	69.03	89.88	4	1	9	2	0	0	0	0	0	0	2		0	1	2	0	1900-01-02	2	2	1	2014-07-01	463	3	2007-07-24
1700	0	2007-07-26	2013-07-15	32	154	49	20.66	3TC+D4T30+NVP	1	1	0	0	2		1	2	2	1	2	2	9	641	0	78.76	69.88	2	2	9	2	0	0	0	0	0	0	2		0	0	2	0	1900-01-02	2	2	6	2014-07-01	351	3	2007-07-12
1704	0	2007-07-31	2013-12-17	38	155	55	22.89	3TC+D4T30+NVP	1	1	0	0	2		1	2	2	1	2	2	0	575	0	40.7	143.35	2	2	9	2	0	0	0	0	0	0	2		0	1	2	0	1900-01-02	2	2	1	2014-07-01	196	3	2007-07-26
1714	0	2007-08-08	2013-08-13	29	150	44	19.56	3TC+D4T30+EFV600	1	1	0	0	2		1	2	2	1	2	2	9	513	0	76.99	65.97	4	2	2	2	0	0	0	0	0	0	2		0	0	2	0	1900-01-02	2	2	1	2014-07-01	322	3	2007-08-06
1716	0	2007-08-08	2013-12-16	36	157	46	18.66	3TC+D4T30+NVP	1	1	0	0	2		1	2	2	1	2	2	0	649	0	77.88	63.88	3	2	9	2	0	0	0	0	0	0	2		0	0	2	0	1900-01-02	2	2	1	2014-07-01	197	3	2007-08-06
1723	1	2007-08-10	2013-02-20	37	154	58	24.46	3TC+D4T30+EFV600	1	1	0	0	2		1	2	2	1	2	2	0	800	0	80.51	91.27	3	9	9	2	0	0	0	0	0	0	2		0	0	2	0	1900-01-02	2	2	1	2014-07-01	496	3	2007-08-08
1725	1	2007-08-08	2013-08-14	38	162	60	22.86	3TC+D4T30+EFV600	1	1	1	0	2		1	2	2	1	2	2	0	736	0	102.66	73.33	4	9	2	2	0	0	0	0	0	0	2		0	1	2	0	1900-01-02	2	2	1	2014-07-01	321	3	2007-08-06
1729	1	2007-08-16	2013-03-21	41	170	59	20.42	3TC+D4T30+NVP	1	1	0	0	2		1	2	2	1	2	2	0	576	0	74.34	96.64	3	9	9	2	0	0	0	0	0	0	2		0	0	2	0	1900-01-02	2	2	1	2014-07-01	467	3	2007-08-15
1732	0	2007-08-16	2013-11-07	35	146	51	23.93	3TC+D4T30+NVP	1	1	0	0	2		1	2	2	1	2	2	0	776	0	63.72	87.4	3	2	9	2	0	0	0	0	0	0	2		0	0	2	0	1900-01-02	2	2	1	2014-07-01	236	3	2007-08-16
1733	1	2007-08-17	2013-09-19	27	156	65	26.71	3TC+D4T30+EFV600	1	1	0	0	2		1	2	2	1	2	2	9	510	0	73.45	123	4	2	2	2	0	0	0	0	0	0	2		0	0	2	0	1900-01-02	2	2	1	2014-07-01	285	3	2007-08-15
1734	0	2007-08-20	2012-04-27	39	143	45	22.01	3TC+AZT+NVP	1	1	0	0	2		1	2	2	1	2	2	0	546	9999999	54.87	86.15	3	2	2	2	0	0	0	0	0	0	2		0	0	2	0	1900-01-02	2	2	1	2014-07-01	795	3	2007-08-13
1738	0	2007-08-22	2012-11-20	38	159	55	21.76	3TC+D4T30+NVP	1	1	0	0	2		1	2	2	1	2	2	0	651	0	94.69	61.62	3	2	1	2	0	0	0	0	0	0	2		0	0	2	0	1900-01-02	2	2	1	2014-07-01	588	3	2007-08-20
1752	1	2007-08-29	2012-01-03	47	164	49	18.22	3TC+D4T30+EFV600	1	1	0	0	2		1	2	2	1	2	2	9	223	9999999	118.59	47.26	3	9	9	2	0	0	0	0	0	0	2		0	0	2	0	1900-01-02	2	2	6	2014-07-01	910	3	2008-06-09
1753	1	2007-06-22	2013-01-23	42	175	68	22.2	3TC+D4T30+EFV600	1	1	0	0	2		1	2	2	1	2	2	0	419	0	93.81	87.38	3	9	2	2	0	0	0	0	0	0	2		0	0	2	0	1900-01-02	2	2	1	2014-07-01	524	3	2007-10-18
1758	1	2007-08-31	2013-09-12	46	172	55	18.59	3TC+D4T30+NVP	1	1	0	0	2		1	2	2	1	2	2	0	784	0	96.47	65.92	3	9	1	2	0	0	0	0	0	0	2		0	0	2	0	1900-01-02	2	2	1	2014-07-01	292	3	2007-10-04
1760	0	2007-09-03	2013-02-21	46	148	50	22.83	3TC+D4T30+EFV600	1	1	0	0	2		1	2	2	1	2	2	9	704	0	71.9	67.98	4	2	9	2	0	0	0	0	0	0	2		0	0	2	0	1900-01-02	2	2	1	2014-07-01	495	3	2007-10-10
1768	1	2007-09-14	2013-10-18	43	161	70	27.01	3TC+D4T30+NVP	1	1	1	1	2		1	2	2	1	2	2	9	769	200	61.1	136.69	3	9	9	2	0	0	0	0	0	0	2		0	1	2	0	1900-01-02	2	2	1	2014-07-01	256	3	2007-09-12
1777	1	2007-09-20	2012-09-25	36	163	56	21.08	3TC+D4T30+NVP	1	1	0	0	2		1	2	2	1	2	2	9	784	0	101.77	70.39	3	2	2	2	0	0	0	0	0	0	2		0	0	2	0	1900-01-02	2	2	1	2014-07-01	644	3	2007-09-18
1782	0	2007-09-27	2013-08-20	37	150	38	16.89	3TC+D4T30+NVP	1	1	0	0	2		1	2	2	1	2	2	0	346	9999999	59.29	68.66	3	2	2	2	0	0	0	0	0	0	2		0	0	2	0	1900-01-02	1	2	4	2013-10-06	47	3	2007-09-24
1790	0	2007-10-03	2013-07-16	23	148	52	23.74	3TC+D4T30+NVP	1	1	0	0	2		1	2	2	1	2	2	0	496	9999999	64.6	97.95	3	2	2	2	0	0	0	0	0	0	2		0	0	2	0	1900-01-02	2	2	1	2014-07-01	350	3	2007-10-01
1792	1	2007-10-04	2013-09-03	34	163	52	19.57	3TC+D4T30+NVP	1	1	0	0	2		1	2	2	1	2	2	0	319	0	101.77	66.62	4	9	9	1	2	2	1	2	2	2	2		0	0	2	0	1900-01-02	2	2	1	2014-07-01	301	3	2007-10-02
1804	1	2007-10-11	2013-09-05	35	153	52	22.21	3TC+D4T30+EFV600	1	1	0	0	2		1	2	2	1	2	2	0	593	0	108.85	61.7	3	9	1	2	0	0	0	0	0	0	2		0	0	2	0	1900-01-02	2	2	1	2014-07-01	299	3	2007-10-09
1805	0	2007-10-12	2013-02-20	35	160	52	20.31	3TC+D4T30+NVP	1	1	0	0	2		1	2	2	1	2	2	9	892	0	63.72	89.11	2	2	2	2	0	0	0	0	0	0	2		0	0	2	0	1900-01-02	2	2	1	2014-07-01	496	3	2007-10-10
1821	1	2007-10-18	2012-11-26	38	160	50	19.53	3TC+D4T30+NVP	1	1	0	0	2		1	2	2	1	2	2	9	604	108	90.27	69.49	3	2	2	2	0	0	0	0	0	0	2		0	0	1	2	2014-03-24	2	2	5	2014-03-24	483	3	2007-10-15
1824	0	2007-10-18	2013-12-10	16	144	34	16.4	3TC+D4T30+EFV600	1	1	0	0	2		1	2	2	1	2	2	0	1108	0	48.67	90.09	3	2	9	2	0	0	0	0	0	0	2		0	0	2	0	1900-01-02	2	2	1	2014-07-01	203	3	2007-10-16
1834	0	2007-10-23	2013-04-30	33	142	44	21.82	3TC+D4T30+NVP	1	1	0	0	2		1	2	2	1	2	2	0	479	0	76.99	63.6	4	2	9	2	0	0	0	0	0	0	2		0	0	2	0	1900-01-02	2	2	1	2014-07-01	427	3	2008-01-22
1836	0	2007-10-25	2012-12-20	45	157	52	21.1	3TC+D4T30+NVP	1	1	0	0	2		1	2	2	1	2	2	0	849	0	74.34	69.11	3	2	9	2	0	0	0	0	0	0	2		0	0	2	0	1900-01-02	2	2	1	2014-07-01	558	3	2007-10-23
1840	1	2007-10-31	2012-08-29	36	156	65	26.71	3TC+D4T30+EFV600	1	1	0	0	2		1	2	2	2	1	2	9	379	0	84.07	98.9	3	2	9	2	0	0	0	0	0	0	2		0	0	2	0	1900-01-02	2	2	1	2014-07-01	671	3	2007-10-29
1854	1	2007-11-14	2013-07-30	34	160	51	19.92	3TC+D4T30+NVP	1	1	0	0	2		1	2	2	1	2	2	0	514	0	63.72	104.35	3	9	9	2	0	0	0	0	0	0	2		0	0	2	0	1900-01-02	2	2	1	2014-07-01	336	3	2007-12-14
1856	1	2007-11-15	2012-09-20	31	170	58	20.07	3TC+D4T30+NVP	1	1	0	0	2		1	2	2	1	2	2	9	731	0	84.96	91.53	1	2	2	2	0	0	0	0	0	0	2		0	0	2	0	1900-01-02	2	2	1	2014-07-01	649	3	2008-05-26
1864	1	2007-11-21	2012-10-23	30	164	62	23.05	3TC+D4T30+NVP	1	1	0	0	2		1	2	2	1	2	2	9	908	0	78.77	106.49	2	2	2	2	0	0	0	0	0	0	2		0	0	2	0	1900-01-02	2	2	1	2014-07-01	616	3	2007-12-06
1865	0	2007-11-21	2013-02-22	44	150	43	19.11	3TC+D4T30+NVP	1	1	1	1	2		1	2	2	1	2	2	0	347	9999999	46.02	93.29	3	2	2	1	2	2	1	2	2	2	2		1	0	2	0	1900-01-02	2	2	1	2014-07-01	494	3	2007-11-27
1869	1	2007-11-22	2013-01-23	17	155	50	20.81	3TC+D4T30+EFV600	1	1	0	0	2		1	2	2	1	2	2	0	504	0	55.75	135.69	3	9	9	2	0	0	0	0	0	0	2		0	0	2	0	1900-01-02	2	2	1	2014-07-01	524	3	2008-02-06
1872	0	2007-11-27	2013-06-26	60	148	45	20.54	3TC+D4T30+NVP	1	1	0	0	2		1	2	2	1	2	2	9	477	0	76.99	48.63	2	2	9	2	0	0	0	0	0	0	2		0	0	2	0	1900-01-02	2	2	1	2014-07-01	370	3	2007-11-21
1874	0	2007-11-27	2013-02-25	42	154	50	21.08	EFV600+FTC+TDF	0	2	0	0	2		1	2	2	1	2	2	0	278	9999999	81.4	62.6	2	2	2	1	2	2	1	2	2	2	2		0	0	2	0	1900-01-02	2	2	1	2014-07-01	491	3	2007-11-22
1880	1	2007-11-29	2013-04-29	40	155	51	21.23	3TC+D4T30+NVP	1	1	0	0	2		1	2	2	1	2	2	0	578	0	94.69	66.25	3	9	9	2	0	0	0	0	0	0	2		0	0	2	0	1900-01-02	2	2	6	2014-07-01	428	3	2007-11-27
1882	1	2007-11-29	2012-11-19	34	154	52	21.93	3TC+D4T30+NVP	1	1	0	0	2		1	2	2	1	2	2	0	154	0	91.16	74.37	3	9	9	1	2	2	1	2	2	2	2		0	0	2	0	1900-01-02	2	2	1	2014-07-01	589	2	2007-11-27
1884	0	2007-12-03	2013-01-03	41	152	44	19.04	3TC+D4T30+EFV600	1	1	0	0	2		1	2	2	1	2	2	9	880	0	56.82	79.73	4	1	9	2	0	0	0	0	0	0	2		0	0	2	0	1900-01-02	2	2	1	2014-07-01	544	3	2007-11-27
1885	0	2007-12-06	2013-05-30	44	159	52	20.57	3TC+EFV600+TDF	0	2	0	0	2		1	2	2	1	2	2	0	452	9999999	83.2	62.4	1	2	9	1	2	2	2	2	2	1	2		0	0	2	0	1900-01-02	2	2	1	2014-07-01	397	3	2007-12-06
1894	0	2007-12-06	2013-01-23	32	156	47	19.31	3TC+D4T30+EFV600	1	1	0	0	2		1	2	2	1	2	2	0	685	0	56.64	93.2	4	2	2	2	0	0	0	0	0	0	2		0	0	2	0	1900-01-02	2	2	1	2014-07-01	524	3	2007-12-03
1899	0	2007-12-11	2012-09-17	41	146	46	21.58	3TC+AZT+NVP	1	1	1	0	2		1	2	2	1	2	2	0	586	9999999	64.6	73.32	1	2	9	2	0	0	0	0	0	0	2		0	1	2	0	1900-01-02	2	2	1	2014-07-01	652	3	2007-12-06
1902	1	2007-12-12	2013-09-03	45	167	60	21.51	3TC+D4T30+EFV600	1	1	0	0	2		1	2	2	1	1	2	0	540	0	88.5	79.22	3	9	2	2	0	0	0	0	0	0	2		0	1	2	0	1900-01-02	2	2	1	2014-07-01	301	3	2007-12-19
191	0	2004-10-15	2012-02-16	37	163	50	18.82	3TC+D4T30+EFV600	1	1	0	0	2		1	2	2	1	2	2	0	609	9999999	55	97.38	3	2	9	2	0	0	0	0	0	0	2		0	0	2	0	1900-01-02	2	2	1	2014-07-01	866	3	2004-10-14
1911	1	2007-12-14	2013-04-29	34	170	54	18.69	3TC+D4T30+NVP	1	1	0	0	2		1	2	2	1	2	2	0	481	0	116.82	60.27	3	9	9	2	0	0	0	0	0	0	2		0	0	2	0	1900-01-02	2	2	1	2014-07-01	428	3	2007-12-12
1912	1	2007-12-17	2012-10-17	44	179	65	20.29	3TC+D4T30+EFV600	1	1	0	0	2		1	2	2	1	2	2	9	285	0	76.11	100.84	4	2	2	1	2	2	1	2	2	2	2		0	0	2	0	1900-01-02	2	2	1	2014-07-01	622	3	2007-12-12
1914	0	2007-12-17	2013-09-04	41	159	53	20.96	3TC+D4T30+NVP	1	1	0	0	2		1	2	2	1	2	2	9	870	0	100	54.57	3	9	9	2	0	0	0	0	0	0	2		0	0	2	0	1900-01-02	2	2	1	2014-07-01	300	3	2007-12-17
1916	1	2007-12-19	2012-08-27	41	158	51	20.43	3TC+D4T30+EFV600	1	1	0	0	2		1	2	2	1	2	2	9	555	0	107.85	57.58	3	9	2	1	2	2	1	2	2	2	2		0	0	2	0	1900-01-02	2	2	1	2014-07-01	673	3	2007-12-12
1917	1	2007-12-19	2012-12-31	37	162	75	28.58	3TC+D4T30+NVP	1	1	0	0	2		1	2	2	1	2	2	9	524	0	128.32	74.05	4	2	2	2	0	0	0	0	0	0	2		0	0	2	0	1900-01-02	2	2	1	2014-07-01	547	3	2007-12-18
1919	1	2008-01-09	2013-07-29	35	167	69	24.74	3TC+D4T30+EFV600	1	1	1	0	2		1	2	2	1	2	2	0	639	0	116.82	76.28	3	9	9	2	0	0	0	0	0	0	2		0	0	2	0	1900-01-02	2	2	1	2014-07-01	337	3	2008-01-23
192	0	2005-01-06	2012-06-14	75	152	57	24.67	3TC+D4T+NVP	1	1	1	0	1	Mild left nephropathy	1	2	2	1	2	2	9	641	0	53.98	71.38	3	9	9	2	0	0	0	0	0	0	2		0	1	2	0	1900-01-02	2	2	1	2014-07-01	747	3	2005-01-06
1920	1	2007-12-20	2013-01-17	34	169	56	19.61	3TC+D4T30+NVP	1	1	0	0	2		1	2	2	1	2	2	0	288	0	69.92	104.42	2	2	2	1	2	2	1	2	2	2	2		0	0	2	0	1900-01-02	2	2	1	2014-07-01	530	3	2007-12-17
1922	0	2007-12-27	2012-07-20	33	153	47	20.08	EFV600+FTC+TDF	0	2	0	0	2		1	2	2	1	2	2	0	202	9999999	86.7	60.32	2	2	9	1	2	2	1	2	2	2	2		0	0	2	0	1900-01-02	2	2	1	2014-07-01	711	3	2007-12-05
1924	1	2007-12-27	2013-11-05	50	157	55	22.31	3TC+D4T30+EFV600	1	1	1	0	2		1	1	2	2	1	2	0	899	0	91.16	66.79	3	2	2	2	0	0	0	0	0	0	2		0	1	2	0	1900-01-02	2	2	1	2014-07-01	238	3	2007-12-19
1929	0	2008-01-02	2013-05-08	43	151	45	19.74	3TC+D4T30+NVP	1	1	0	0	9		1	2	2	1	2	2	1	417	0	72.57	62.55	2	1	9	2	0	0	0	0	0	0	2		0	0	2	0	1900-01-02	2	2	1	2014-07-01	419	3	2007-12-31
1934	1	2008-01-03	2013-02-13	37	156	42	17.26	3TC+D4T30+EFV600	1	1	0	0	2		1	2	2	1	2	2	0	320	9999999	89.39	59.53	3	2	2	1	2	2	1	2	2	2	2		0	0	2	0	1900-01-02	2	2	1	2014-07-01	503	3	2007-12-27
1939	1	2008-01-09	2012-09-25	37	153	50	21.36	3TC+D4T30+NVP	1	1	0	0	2		1	2	2	1	2	2	9	840	0	109.74	57.72	3	9	9	2	0	0	0	0	0	0	2		0	0	2	0	1900-01-02	2	2	6	2014-07-01	644	3	2008-01-07
1940	1	2008-01-09	2013-09-02	43	174	75	24.77	3TC+D4T30+NVP	1	1	0	0	2		1	2	2	1	2	2	9	738	0	93.81	95.39	2	2	2	2	0	0	0	0	0	0	2		0	0	2	0	1900-01-02	2	2	1	2014-07-01	302	3	2008-01-03
1947	1	2008-01-14	2013-05-27	41	165	60	22.04	3TC+D4T30+EFV600	1	1	0	0	2		1	2	2	1	2	2	0	438	0	92.04	79.38	4	9	9	1	2	2	1	2	2	2	2		0	0	2	0	1900-01-02	2	2	1	2014-07-01	400	3	2008-01-22
1950	0	2008-01-15	2012-10-04	47	151	50	21.93	3TC+D4T30+NVP	1	1	1	0	2		1	2	2	1	2	2	9	743	9999999	107.97	44.79	1	2	2	2	0	0	0	0	0	0	2		0	0	2	0	1900-01-02	2	2	1	2014-07-01	635	3	2008-01-10
1951	1	2008-01-16	2013-03-27	65	160	47	18.36	3TC+D4T30+EFV600	1	1	1	0	2		1	2	2	1	2	2	9	1067	0	74.34	58.32	3	2	9	2	0	0	0	0	0	0	2		0	1	2	0	1900-01-02	2	2	1	2014-07-01	461	3	2008-01-14
1954	1	2008-01-16	2013-07-23	43	166	68	24.68	3TC+D4T30+EFV600	1	1	1	0	2		1	2	2	1	2	2	0	1085	0	116.62	69.57	3	9	9	2	0	0	0	0	0	0	2		0	1	2	0	1900-01-02	2	2	1	2014-07-01	343	3	2008-01-14
1958	1	2008-01-17	2013-03-19	36	156	49	20.13	3TC+D4T30+NVP	1	1	1	0	2		1	2	2	1	2	2	0	281	0	104.43	60.02	3	9	9	2	0	0	0	0	0	0	2		0	1	2	0	1900-01-02	2	2	6	2014-07-01	469	3	2008-01-17
1962	1	2008-01-18	2012-05-16	35	160	50	19.53	3TC+D4T30+EFV600	1	1	0	0	2		1	2	2	1	2	2	9	320	0	93.8	68.84	3	2	9	1	2	2	1	2	2	2	2		0	0	2	0	1900-01-02	2	2	1	2014-07-01	776	3	2008-01-14
1965	1	2008-01-21	2013-09-23	44	160	47	18.36	3TC+D4T30+EFV600	1	1	0	0	2		1	2	2	1	2	2	0	393	0	82.3	67.43	3	2	9	2	0	0	0	0	0	0	2		0	0	2	0	1900-01-02	2	2	1	2014-07-01	281	3	2008-02-04
1968	0	2008-01-22	2013-02-15	39	161	53	20.45	3TC+D4T30+NVP	1	1	0	0	2		1	2	2	1	2	2	0	491	9999999	59.29	93.9	2	2	9	2	0	0	0	0	0	0	2		0	0	2	0	1900-01-02	2	2	1	2014-07-01	501	3	2008-01-11
1970	1	2008-01-23	2012-12-19	41	167	63	22.59	3TC+D4T30+EFV600	1	1	0	0	2		1	2	2	1	2	2	9	455	0	68.14	112.58	3	2	2	2	0	0	0	0	0	0	2		0	0	2	0	1900-01-02	2	2	1	2014-07-01	559	3	2008-01-18
1972	0	2008-01-23	2012-07-31	58	147	38	17.59	3TC+D4T30+NVP	1	1	1	0	2		1	2	2	1	2	2	9	365	0	59.2	54.74	3	2	9	1	2	2	1	2	2	2	2		0	1	2	0	1900-01-02	2	2	6	2014-07-01	700	3	2008-01-23
1973	1	2008-01-24	2013-01-18	38	170	66	22.84	3TC+D4T30+EFV600	1	1	0	0	2		1	2	2	1	2	2	0	509	0	82.31	100.6	3	9	2	2	0	0	0	0	0	0	2		0	0	2	0	1900-01-02	2	2	1	2014-07-01	529	3	2008-01-24
1984	0	2008-01-30	2013-11-19	15	152	42	18.18	3TC+D4T30+NVP	1	1	0	0	2		1	2	2	1	2	2	0	1165	0	47.79	114.25	3	2	9	2	0	0	0	0	0	0	2		0	0	2	0	1900-01-02	2	2	1	2014-07-01	224	3	2008-02-12
1989	1	2008-02-05	2012-12-18	34	158	50	20.03	3TC+D4T30+NVP	1	1	0	0	2		1	2	2	1	2	2	9	522	0	109.74	59.4	3	2	2	2	0	0	0	0	0	0	2		0	0	2	0	1900-01-02	2	2	1	2014-07-01	560	3	2008-01-31
1991	0	2008-02-06	2013-08-29	44	152	55	23.81	3TC+D4T30+EFV600	1	1	0	0	2		1	2	2	1	2	2	0	922	0	83.19	66.01	3	2	9	2	0	0	0	0	0	0	2		0	0	2	0	1900-01-02	2	2	1	2014-07-01	306	3	2008-01-31
1994	1	2008-02-07	2012-09-21	32	158	47	18.83	3TC+D4T30+NVP	1	1	0	0	2		1	2	2	1	2	2	9	326	0	58.3	107.09	2	2	2	1	2	2	1	2	2	2	2		0	0	2	0	1900-01-02	2	2	1	2014-07-01	648	3	2008-02-05
1995	0	2008-02-08	2013-11-11	33	150	53	23.56	3TC+EFV600+TDF	1	2	0	0	2		1	2	2	1	2	2	0	282	9999999	95.58	61.71	1	2	9	1	2	2	1	2	2	2	2		0	0	2	0	1900-01-02	2	2	1	2014-07-01	232	3	2008-02-06
1998	1	2008-02-13	2013-06-26	43	170	72	24.91	3TC+D4T30+NVP	1	1	0	0	2		1	2	2	1	2	2	0	641	0	70.8	121.33	4	9	9	2	0	0	0	0	0	0	2		0	0	2	0	1900-01-02	2	2	1	2014-07-01	370	3	2008-02-13
2000	1	2008-02-19	2013-11-14	37	156	58	23.83	3TC+D4T30+NVP	1	1	0	0	2		1	2	2	1	2	2	0	520	94	81.42	90.25	2	9	1	2	0	0	0	0	0	0	2		0	1	2	0	1900-01-02	2	2	1	2014-07-01	229	3	2008-02-19
2001	1	2008-02-19	2012-01-26	28	161	39	15.05	3TC+D4T30+NVP	1	1	0	0	2		1	2	2	1	2	2	0	374	0	66	81.4	3	9	9	1	2	2	1	2	2	2	2		0	0	2	0	1900-01-02	2	2	2	2012-05-26	121	3	2008-02-26
2009	0	2008-02-26	2012-12-03	44	157	52	21.1	3TC+D4T30+NVP	1	1	1	0	2		1	2	2	1	2	2	9	710	0	93.81	55.34	3	2	9	2	0	0	0	0	0	0	2		0	1	2	0	1900-01-02	2	2	6	2014-07-01	575	3	2008-02-20
2011	1	2008-02-27	2013-11-15	40	171	57	19.49	3TC+D4T30+NVP	1	1	0	0	2		1	2	2	1	2	2	0	255	0	72.57	96.61	2	9	2	1	2	2	1	2	2	2	2		0	0	2	0	1900-01-02	2	2	1	2014-07-01	228	3	2008-02-27
2015	0	2008-02-28	2013-09-18	31	152	49	21.21	3TC+D4T30+EFV600	1	1	0	0	2		1	2	2	1	2	2	0	276	0	53.1	104.61	3	2	9	1	2	2	1	2	2	2	2		0	0	2	0	1900-01-02	2	2	1	2014-07-01	286	3	2008-02-28
2018	1	2008-03-04	2013-05-07	50	163	56	21.08	3TC+D4T30+EFV600	1	1	0	0	2		1	2	2	1	2	2	0	740	0	80.53	76.98	3	9	9	2	0	0	0	0	0	0	2		0	0	2	0	1900-01-02	2	2	1	2014-07-01	420	3	2008-03-11
2020	0	2008-03-04	2013-06-24	40	151	72	31.58	3TC+D4T30+EFV600	1	1	0	0	2		1	2	2	1	2	2	9	1896	0	92.04	81.36	3	2	2	2	0	0	0	0	0	0	2		0	0	2	0	1900-01-02	2	2	1	2014-07-01	372	3	2008-03-18
2025	1	2008-03-06	2013-12-18	41	172	66	22.31	3TC+D4T30+NVP	1	1	0	0	2		1	2	2	1	2	2	0	632	0	52.22	153.9	2	9	9	2	0	0	0	0	0	0	2		0	0	2	0	1900-01-02	2	2	1	2014-07-01	195	3	2008-03-14
2026	1	2008-03-06	2013-11-14	36	165	50	18.37	3TC+D4T30+EFV600	1	1	1	0	2		1	2	2	1	2	2	0	544	0	92.04	69.49	3	9	9	2	0	0	0	0	0	0	2		0	1	2	0	1900-01-02	2	2	1	2014-07-01	229	3	2008-03-06
2027	1	2008-03-10	2012-10-16	40	155	49	20.4	EFV600+FTC+TDF	0	2	0	0	2		1	2	2	1	2	2	0	655	9999999	54	111.61	3	2	9	2	0	0	0	0	0	0	2		0	0	2	0	1900-01-02	2	2	1	2014-07-01	623	3	2008-03-10
2031	0	2008-03-12	2012-08-22	34	155	56	23.31	3TC+D4T30+NVP	1	1	1	0	2		1	2	2	1	2	2	9	1288	0	72.57	85.07	3	2	2	2	0	0	0	0	0	0	2		0	1	2	0	1900-01-02	2	2	1	2014-07-01	678	3	2008-03-12
2032	0	2008-03-12	2012-07-25	46	152	55	23.81	3TC+D4T30+NVP	1	1	0	0	2		1	2	2	1	2	2	9	375	0	65.49	82.1	3	9	9	2	0	0	0	0	0	0	2		0	0	2	0	1900-01-02	2	2	1	2014-07-01	706	3	2008-03-12
2033	1	2008-03-12	2013-03-21	33	162	52	19.81	3TC+D4T30+NVP	1	1	0	0	2		1	2	2	1	2	2	0	592	0	113.28	60.41	3	9	9	2	0	0	0	0	0	0	2		0	0	2	0	1900-01-02	2	2	2	2014-01-28	313	3	2008-03-12
2038	1	2008-03-18	2012-07-18	59	173	60	20.05	3TC+D4T30+EFV600	1	1	0	0	2		1	2	2	1	2	2	0	352	0	116.8	51.18	4	9	9	1	2	2	1	2	2	2	2		0	0	2	0	1900-01-02	2	2	6	2014-07-01	713	3	2008-03-18
2039	1	2008-03-18	2012-12-28	30	166	69	25.04	3TC+D4T30+NVP	1	1	0	0	2		1	2	2	1	2	2	0	417	80	85	109.83	4	9	9	2	0	0	0	0	0	0	2		0	0	2	0	1900-01-02	2	1	3	2014-07-01	550	3	2008-03-18
2041	1	2008-03-19	2012-01-10	39	166	49	17.78	3TC+D4T30+NVP	1	1	0	0	2		1	2	2	1	1	2	9	333	9999999	92.04	66.14	4	1	1	2	0	0	0	0	0	0	2		0	0	2	0	1900-01-02	2	2	1	2014-07-01	903	3	2008-03-19
2042	0	2008-03-19	2012-10-18	37	156	57	23.42	EFV600+FTC+TDF	0	2	0	0	2		1	2	2	1	2	2	0	253	9999999	64.6	94.52	2	2	9	1	2	2	1	1	2	2	2		0	0	2	0	1900-01-02	2	2	1	2014-07-01	621	3	2008-11-03
2043	1	2008-03-19	2013-07-25	35	177	65	20.75	3TC+D4T30+NVP	1	1	0	0	2		1	2	2	1	1	2	0	721	0	124.78	67.28	2	9	9	2	0	0	0	0	0	0	2		0	0	2	0	1900-01-02	2	2	1	2014-07-01	341	3	2008-03-19
2050	1	2008-03-20	2013-06-24	38	163	71	26.72	3TC+D4T30+NVP	1	1	0	0	2		1	2	2	1	2	2	0	381	0	76.11	117.04	2	9	9	2	0	0	0	0	0	0	2		0	0	2	0	1900-01-02	2	2	1	2014-07-01	372	3	2008-03-26
2051	1	2008-03-20	2013-10-03	27	157	44	17.85	3TC+EFV600+TDF	0	2	0	0	2		1	2	2	1	2	2	9	211	9999999	42.48	143.96	2	9	9	1	2	2	1	2	2	2	2		0	0	2	0	2014-01-23	2	1	2	2014-01-23	112	3	2008-03-20
2054	0	2008-03-25	2013-10-09	42	146	61	28.62	3TC+D4T30+EFV600	1	1	0	9	2		1	2	2	1	2	2	9	777	0	70.8	87.81	3	9	2	2	0	0	0	0	0	0	2		0	0	2	0	1900-01-02	2	1	3	2014-06-18	252	3	2008-03-20
2059	1	2008-03-27	2012-10-18	38	162	58	22.1	3TC+D4T30+NVP	1	1	0	0	2		1	2	2	1	2	2	9	230	81	79.65	91.36	2	2	1	1	2	2	1	2	2	2	2		0	0	1	2	2014-06-25	2	2	5	2014-06-25	615	3	2008-03-27
2069	1	2008-04-03	2013-05-23	41	154	49	20.66	3TC+D4T30+NVP	1	1	0	0	2		1	2	2	1	2	2	0	122	0	102.66	58.12	3	9	9	1	2	2	1	2	2	2	2		0	0	2	0	1900-01-02	2	2	1	2014-07-01	404	2	2008-04-03
2075	1	2008-04-10	2013-02-21	33	164	63	23.42	3TC+D4T30+EFV600	1	1	0	0	2		1	2	2	1	2	2	0	545	0	91.89	90.23	3	9	9	2	0	0	0	0	0	0	2		0	0	2	0	1900-01-02	2	2	1	2014-07-01	495	3	2008-04-24
2080	1	2008-04-24	2013-01-01	40	169	56	19.61	3TC+D4T30+EFV600	1	1	0	1	2		1	2	2	1	2	2	9	510	0	99.12	69.49	3	2	9	2	0	0	0	0	0	0	2		0	0	2	0	1900-01-02	2	2	1	2014-07-01	546	3	2008-04-24
2086	1	2008-04-24	2013-02-20	40	158	48	19.23	3TC+D4T30+EFV600	1	1	0	0	2		1	2	2	1	2	2	0	205	0	74.34	79.42	3	2	9	1	2	2	1	2	2	2	2		0	0	1	2	2014-03-20	2	2	5	2014-03-20	393	3	2008-05-08
2088	1	2008-04-24	2013-09-11	34	165	45	16.53	3TC+D4T30+NVP	1	1	0	0	2		1	2	2	1	1	2	0	597	0	107.97	54.34	3	9	9	2	0	0	0	0	0	0	2		0	0	2	0	1900-01-02	2	2	1	2014-07-01	293	3	2008-04-22
2102	1	2008-05-07	2012-07-09	71	160	54	21.09	3TC+D4T30+NVP	1	1	0	0	2		1	2	2	1	2	2	9	405	0	89.38	51.28	3	2	9	1	2	2	1	2	2	2	2		0	0	2	0	1900-01-02	2	2	1	2014-07-01	722	3	2008-05-07
2104	0	2008-05-08	2012-11-22	27	155	81	33.71	3TC+AZT+NVP	1	1	0	0	2		1	2	2	1	2	2	9	891	9999999	81.41	116.93	3	9	9	2	0	0	0	0	0	0	2		0	0	2	0	1900-01-02	2	2	1	2014-07-01	586	3	2008-05-08
2105	1	2008-05-08	2012-05-28	46	161	54	20.83	3TC+D4T30+NVP	1	1	1	0	2		1	2	2	1	2	2	1	428	9999999	99.12	62.99	3	1	9	2	0	0	0	0	0	0	2		0	0	2	0	1900-01-02	2	2	1	2014-07-01	764	3	2008-05-16
2109	1	2008-05-12	2013-01-22	35	165	60	22.04	3TC+D4T30+NVP	1	1	0	0	2		1	2	2	1	2	2	0	567	0	100.89	76.81	2	2	2	2	0	0	0	0	0	0	2		0	0	2	0	1900-01-02	2	2	1	2014-07-01	525	3	2008-05-27
2117	0	2008-05-20	2013-03-20	35	157	49	19.88	3TC+D4T30+EFV600	1	1	0	0	2		1	2	2	1	2	2	9	980	0	67.26	79.55	3	9	9	2	0	0	0	0	0	0	2		0	0	2	0	1900-01-02	2	2	1	2014-07-01	468	3	2008-05-20
2121	0	2008-05-22	2012-09-26	37	150	63	28	3TC+D4T30+NVP	1	1	0	0	2		1	2	2	1	2	2	9	695	0	106.2	63.55	3	2	2	2	0	0	0	0	0	0	2		0	0	2	0	1900-01-02	2	2	1	2014-07-01	643	3	2008-05-22
2127	0	2008-05-26	2012-09-20	47	151	70	30.7	3TC+D4T30+NVP	1	1	1	0	9		1	2	2	1	2	2	9	673	0	93.81	72.17	4	9	9	2	0	0	0	0	0	0	2		0	1	2	0	1900-01-02	2	2	1	2014-07-01	649	3	2008-06-05
2130	0	2008-05-28	2012-09-04	37	155	45	18.73	3TC+D4T30+NVP	1	1	0	0	2		1	2	2	1	2	2	0	434	0	54.87	87.85	3	2	9	2	0	0	0	0	0	0	2		0	0	2	0	1900-01-02	2	2	1	2014-07-01	665	3	2008-05-28
214	0	2005-01-13	2012-06-20	43	154	55	23.19	3TC+D4T30+NVP	1	1	0	0	9		1	2	2	1	2	2	9	843	9999999	65.99	84.08	3	2	9	1	2	2	2	2	2	1	2		0	0	2	0	1900-01-02	2	2	1	2014-07-01	741	3	2005-01-13
2141	0	2008-06-06	2012-10-15	36	150	57	25.33	3TC+D4T30+NVP	1	1	0	0	2		1	2	2	1	2	2	0	635	0	77.88	79.16	3	2	9	2	0	0	0	0	0	0	2		0	0	2	0	1900-01-02	2	2	1	2014-07-01	624	3	2008-06-06
2144	1	2008-06-09	2013-02-27	34	152	55	23.81	3TC+D4T30+EFV600	1	1	0	0	2		1	2	2	1	2	2	0	709	0	132.75	54.02	4	9	9	2	0	0	0	0	0	0	2		0	0	2	0	1900-01-02	2	2	2	2014-01-07	314	3	2008-06-09
2145	0	2008-06-09	2013-12-12	33	151	56	24.56	3TC+D4T30+EFV600	1	1	0	0	2		1	2	2	1	2	2	0	381	0	64.6	96.47	3	2	9	2	0	0	0	0	0	0	2		0	0	2	0	1900-01-02	2	2	1	2014-07-01	201	3	2008-06-09
2150	0	2008-06-11	2012-08-22	20	150	43	19.11	3TC+D4T30+NVP	1	1	0	0	9		1	2	2	1	2	2	9	475	0	61.95	86.62	3	2	9	2	0	0	0	0	0	0	2		0	0	2	0	1900-01-02	2	2	1	2014-07-01	678	3	2008-06-11
2151	1	2008-06-12	2013-09-18	33	167	57	20.44	3TC+D4T30+NVP	1	1	0	0	2		1	2	2	1	2	2	0	1429	0	82.3	91.15	3	9	9	2	0	0	0	0	0	0	2		0	0	2	0	1900-01-02	2	2	1	2014-07-01	286	3	2008-06-12
2152	1	2008-06-12	2013-01-17	42	174	54	17.84	3TC+D4T30+EFV600	1	1	0	0	2		1	2	2	1	2	2	0	562	0	99.12	65.67	3	2	9	2	0	0	0	0	0	0	2		0	0	2	0	1900-01-02	2	2	1	2014-07-01	530	3	2008-06-05
2154	0	2008-06-16	2013-02-26	43	152	64	27.7	3TC+EFV600+TDF	0	2	0	0	2		1	2	2	1	2	2	0	314	9999999	79.65	81.06	1	2	2	2	0	0	0	0	0	0	2		0	0	2	0	1900-01-02	2	2	1	2014-07-01	490	3	2008-06-16
2156	1	2008-06-16	2013-10-24	35	166	57	20.69	3TC+D4T30+EFV600	1	1	0	0	2		1	2	2	1	2	2	0	1082	0	77.88	94.52	4	9	9	2	0	0	0	0	0	0	2		0	0	2	0	1900-01-02	2	2	1	2014-07-01	250	3	2008-06-16
217	1	2005-01-13	2013-06-20	41	164	57	21.19	3TC+D4T+EFV600	1	1	0	0	2		2	0	0	0	0	0	1	385	9999999	83.19	83.43	3	1	2	2	0	0	0	0	0	0	2		0	0	2	0	1900-01-02	2	2	1	2014-07-01	376	3	2005-01-13
2173	0	2008-06-30	2012-08-09	65	140	36	18.37	3TC+D4T30+NVP	1	1	0	0	2		1	2	2	1	2	2	0	701	0	41.9	67.02	3	2	2	1	2	2	2	1	2	2	1	Nephropathy	0	0	1	1	2013-05-16	2	2	5	2013-05-16	280	3	2008-06-30
2178	1	2008-07-02	2012-12-26	47	164	60	22.31	3TC+D4T30+NVP	1	1	0	0	2		1	2	2	1	2	2	9	610	0	63.72	107.71	3	2	9	2	0	0	0	0	0	0	2		0	0	2	0	1900-01-02	2	2	1	2014-07-01	552	3	2008-07-02
2186	1	2008-07-07	2013-07-15	41	163	59	22.21	3TC+D4T30+NVP	1	1	0	0	2		1	2	2	1	2	2	0	377	0	102.66	69.98	3	9	9	2	0	0	0	0	0	0	2		0	0	2	0	1900-01-02	2	2	1	2014-07-01	351	3	2008-07-07
2190	1	2008-07-10	2012-09-27	34	168	62	21.97	3TC+D4T30+NVP	1	1	1	0	2		1	2	2	1	2	2	9	159	0	126.55	63.88	3	2	9	1	2	2	1	2	2	2	2		0	0	2	0	1900-01-02	2	2	1	2014-07-01	642	2	2008-07-10
2191	0	2008-07-14	2013-01-09	28	158	50	20.03	EFV600+FTC+TDF	0	2	0	0	2		1	2	2	1	2	2	0	751	9999999	66.4	87.71	4	2	2	2	0	0	0	0	0	0	2		0	0	2	0	1900-01-02	2	2	1	2014-07-01	538	3	2008-07-15
2192	0	2008-07-16	2013-06-12	54	155	49	20.4	3TC+D4T30+NVP	1	1	0	0	2		1	2	2	1	2	2	9	396	0	71.68	61.14	3	9	9	2	0	0	0	0	0	0	2		0	0	2	0	1900-01-02	2	2	1	2014-07-01	384	3	2008-07-16
2194	1	2008-07-21	2012-11-26	50	156	47	19.31	3TC+D4T30+NVP	1	2	0	0	2		1	2	2	1	2	2	0	647	0	100.89	51.57	2	2	1	2	0	0	0	0	0	0	2		0	0	2	0	1900-01-02	2	2	1	2014-07-01	582	3	2008-08-04
2199	0	2008-07-22	2013-01-21	40	144	50	24.11	3TC+D4T30+NVP	1	1	0	0	2		1	2	2	1	2	2	0	743	0	89.38	58.18	4	2	2	2	0	0	0	0	0	0	2		0	0	2	0	1900-01-02	2	2	1	2014-07-01	526	3	2008-07-23
2200	1	2008-07-24	2012-10-15	34	158	48	19.23	3TC+D4T30+EFV600	1	1	1	0	2		1	2	2	1	2	2	9	483	0	104.43	59.93	4	2	1	2	0	0	0	0	0	0	2		0	1	2	0	1900-01-02	2	2	1	2014-07-01	624	3	2008-07-24
2201	0	2008-07-24	2013-09-04	45	156	51	20.96	3TC+D4T30+NVP	1	1	0	0	2		1	2	2	1	2	2	9	892	0	82.3	61.22	2	9	9	2	0	0	0	0	0	0	2		0	0	2	0	1900-01-02	2	2	1	2014-07-01	300	3	2008-07-24
2202	1	2008-07-25	2013-01-25	48	162	74	28.2	3TC+D4T30+NVP	1	1	0	0	2		1	2	2	1	2	2	0	501	9999999	80.53	103.98	2	9	9	2	0	0	0	0	0	0	2		0	0	2	0	1900-01-02	2	2	1	2014-07-01	522	3	2008-07-25
2206	1	2008-08-04	2013-10-24	37	159	50	19.78	3TC+D4T30+NVP	1	1	0	0	2		1	2	2	1	2	2	0	496	0	105.31	60.15	3	9	9	2	0	0	0	0	0	0	2		0	0	2	0	1900-01-02	2	2	1	2014-07-01	250	3	2008-08-04
2208	1	2008-08-04	2012-02-06	46	162	46	17.53	3TC+D4T30+EFV600	1	1	0	0	2		1	2	2	1	2	2	9	466	9999999	74.34	71.54	3	2	9	1	2	2	1	2	2	2	2		0	0	2	0	1900-01-02	2	2	1	2014-07-01	876	3	2008-08-04
2210	0	2008-08-04	2012-05-18	31	145	33	15.7	3TC+D4T30+NVP	1	1	0	0	2		1	2	2	1	2	2	9	1204	9999999	72.22	51.8	3	2	2	2	0	0	0	0	0	0	2		0	0	2	0	1900-01-02	2	2	1	2014-07-01	774	3	2008-08-04
2221	1	2008-08-12	2013-12-13	37	152	42	18.18	3TC+AZT+NVP	1	2	0	0	2		1	2	2	1	2	2	0	693	0	102.66	51.83	1	9	2	2	0	0	0	0	0	0	2		0	0	2	0	1900-01-02	2	2	6	2014-07-01	200	3	2008-08-12
2222	0	2008-08-12	2013-03-25	34	150	51	22.67	3TC+D4T30+NVP	1	1	0	0	2		1	2	2	1	2	2	9	624	0	77.88	72.19	3	2	9	2	0	0	0	0	0	0	2		0	0	2	0	1900-01-02	2	2	1	2014-07-01	463	3	2008-08-12
2223	0	2008-08-12	2013-04-24	39	148	52	23.74	3TC+EFV600+TDF	0	2	0	0	2		1	2	2	1	2	2	0	346	9999999	76.1	71.78	3	2	9	2	0	0	0	0	0	0	2		0	0	2	0	1900-01-02	2	2	1	2014-07-01	433	3	2009-01-20
2225	1	2008-08-15	2012-10-17	31	170	69	23.88	3TC+D4T30+EFV600	1	1	0	0	2		2	0	0	0	0	0	9	483	0	72.57	127.47	4	2	2	2	0	0	0	0	0	0	2		0	0	2	0	1900-01-02	2	2	1	2014-07-01	622	3	2008-08-15
2227	1	2008-08-18	2012-10-17	37	164	59	21.94	3TC+D4T30+EFV600	1	1	0	0	2		1	2	2	1	2	2	9	633	0	61.95	120.66	3	9	1	2	0	0	0	0	0	0	2		0	0	2	0	1900-01-02	2	2	1	2014-07-01	622	3	2008-08-25
2230	1	2008-08-19	2013-06-06	39	168	59	20.9	3TC+D4T30+NVP	1	1	0	0	2		1	2	2	1	2	2	0	655	0	100	73.3	3	9	9	2	0	0	0	0	0	0	2		0	0	2	0	1900-01-02	2	2	1	2014-07-01	390	3	2008-08-19
2231	1	2008-08-19	2013-09-19	35	171	64	21.89	3TC+D4T30+NVP	1	1	1	0	2		1	2	2	1	2	2	0	783	0	79.65	103.77	3	2	9	2	0	0	0	0	0	0	2		0	1	2	0	1900-01-02	2	2	1	2014-07-01	285	3	2008-08-19
2235	0	2008-08-22	2013-05-06	41	151	64	28.07	3TC+EFV600+TDF	0	2	0	0	2		1	2	2	1	2	2	0	322	9999999	127.4	51.72	1	2	9	1	2	2	1	2	2	2	2		0	0	2	0	1900-01-02	2	2	1	2014-07-01	421	3	2008-08-22
2243	1	2008-09-01	2013-09-19	44	170	53	18.34	3TC+D4T30+EFV600	1	1	0	0	2		1	2	2	1	2	2	0	441	0	115.93	53.98	4	9	9	2	0	0	0	0	0	0	2		0	0	2	0	1900-01-02	2	2	1	2014-07-01	285	3	2008-09-01
2245	0	2008-09-02	2012-09-05	47	146	57	26.74	3TC+AZT+NVP	1	2	1	0	2		1	2	2	1	2	2	9	709	9999999	68.14	80.91	2	9	2	2	0	0	0	0	0	0	2		0	0	2	0	1900-01-02	2	2	1	2014-07-01	664	3	2008-09-02
2247	0	2008-09-03	2013-09-25	37	150	53	23.56	3TC+EFV600+TDF	0	2	0	0	2		2	0	0	0	0	0	0	625	9999999	81.42	69.73	2	2	9	2	0	0	0	0	0	0	2		0	0	2	0	1900-01-02	2	2	1	2014-07-01	279	3	2008-09-03
2250	0	2008-09-05	2012-11-22	46	142	48	23.8	3TC+D4T30+EFV600	1	1	0	0	2		1	2	2	1	2	2	9	573	0	71.68	65.46	4	2	9	2	0	0	0	0	0	0	2		0	0	2	0	1900-01-02	2	2	1	2014-07-01	586	3	2008-09-05
2255	1	2008-09-11	2013-10-22	67	162	51	19.43	3TC+D4T30+NVP	1	1	1	0	2		1	2	2	1	2	2	0	778	0	113.28	40.42	3	9	9	2	0	0	0	0	0	0	1	Hypertensive nephropathy	1	1	2	0	1900-01-02	2	2	6	2014-07-01	252	3	2008-09-11
2265	1	2008-09-22	2013-10-24	38	161	59	22.76	3TC+D4T30+NVP	1	1	0	0	2		1	2	2	1	2	2	9	649	0	107.97	68.56	2	1	2	2	0	0	0	0	0	0	2		0	0	2	0	1900-01-02	2	2	1	2014-07-01	250	3	2008-09-18
2267	1	2008-09-22	2012-09-20	30	163	66	24.84	3TC+D4T30+NVP	1	1	0	0	2		1	1	1	2	1	1	9	332	0	113.28	78.83	3	1	9	2	0	0	0	0	0	0	2		0	0	2	0	1900-01-02	2	2	1	2014-07-01	649	3	2008-09-22
2269	1	2008-09-24	2013-06-25	38	169	73	25.56	3TC+D4T30+EFV600	1	1	0	0	2		1	2	2	1	2	2	0	489	0	112.39	81.49	4	2	2	2	0	0	0	0	0	0	2		0	0	2	0	1900-01-02	2	2	1	2014-07-01	371	3	2008-09-24
2270	1	2008-09-25	2013-03-29	35	162	63	24.01	3TC+D4T30+EFV600	1	1	0	0	2		1	2	2	1	2	2	0	663	0	81.42	99.93	3	9	9	2	0	0	0	0	0	0	2		0	0	2	0	1900-01-02	2	2	1	2014-07-01	459	3	2008-09-25
2277	0	2008-10-06	2013-09-09	46	152	52	22.51	3TC+D4T30+EFV600	1	1	0	0	2		1	2	2	1	2	2	0	348	0	75.22	67.58	3	2	9	2	0	0	0	0	0	0	2		0	0	2	0	1900-01-02	2	2	1	2014-07-01	295	3	2008-10-06
2282	0	2008-10-08	2013-05-23	35	158	67	26.84	3TC+D4T30+NVP	1	1	0	0	2		1	2	2	1	2	2	9	186	0	88.5	82.67	4	9	9	1	2	2	1	2	2	2	2		0	0	2	0	1900-01-02	2	2	1	2014-07-01	404	2	2008-10-09
2283	1	2008-10-09	2013-11-07	41	175	67	21.88	3TC+D4T30+NVP	1	1	0	0	2		1	2	2	1	2	2	9	964	0	70.8	115.23	3	2	9	2	0	0	0	0	0	0	2		0	0	2	0	1900-01-02	2	2	1	2014-07-01	236	3	2008-10-10
2295	0	2008-10-30	2013-02-28	51	150	51	22.67	3TC+D4T30+EFV600	1	2	0	0	2		1	2	2	1	2	2	0	902	9999999	33.63	140.37	3	9	9	1	2	2	1	2	2	2	2		0	0	2	0	1900-01-02	2	2	1	2014-07-01	488	3	2008-10-30
2297	1	2008-11-03	2012-11-29	32	167	53	19	3TC+D4T30+EFV600	1	1	0	0	2		1	2	2	1	2	2	0	145	0	100	70.41	3	9	9	1	2	2	1	2	2	2	2		0	0	2	0	1900-01-02	2	2	1	2014-07-01	579	2	2008-11-03
2300	1	2008-11-06	2012-07-17	50	165	53	19.47	3TC+D4T30+NVP	1	1	0	0	2		1	2	2	1	2	2	9	397	0	109.74	53.46	4	9	9	2	0	0	0	0	0	0	2		0	0	2	0	1900-01-02	2	2	2	2013-07-15	363	3	2008-11-06
2302	0	2008-11-07	2013-01-23	32	149	42	18.92	3TC+D4T30+NVP	1	1	0	0	2		1	2	2	1	2	2	9	960	0	63.29	74.54	2	2	2	2	0	0	0	0	0	0	2		0	0	2	0	1900-01-02	2	2	1	2014-07-01	524	3	2008-11-10
2304	1	2008-11-10	2012-11-30	35	171	57	19.49	3TC+D4T30+NVP	1	1	0	0	2		1	2	2	1	2	2	0	390	0	74.34	99.03	3	2	9	1	2	2	1	2	2	2	2		0	0	2	0	1900-01-02	2	2	1	2014-07-01	578	3	2008-11-10
231	0	2005-01-14	2012-05-29	50	157	49	19.88	3TC+D4T30+EFV600	1	1	1	0	2		1	2	2	1	2	2	9	725	0	85.9	53.39	3	2	9	2	0	0	0	0	0	0	2		0	1	2	0	1900-01-02	2	2	1	2014-07-01	763	3	2005-01-17
2310	1	2008-11-17	2013-05-23	37	158	50	20.03	3TC+D4T30+EFV600	1	1	0	0	2		1	2	2	1	2	2	0	501	0	117.7	53.82	3	9	9	1	2	2	1	2	2	2	2		0	0	2	0	1900-01-02	2	2	1	2014-07-01	404	3	2008-11-17
2311	1	2008-11-17	2013-10-09	40	175	76	24.82	3TC+D4T30+EFV600	1	1	0	0	2		1	2	2	1	2	2	0	454	0	108.85	85.88	3	9	2	2	0	0	0	0	0	0	2		0	0	2	0	1900-01-02	2	2	1	2014-07-01	265	3	2008-11-17
2312	1	2008-11-19	2012-12-27	33	170	64	22.15	3TC+D4T30+EFV600	1	1	0	0	2		1	2	2	1	2	2	9	398	0	100	84.23	4	9	9	2	0	0	0	0	0	0	2		0	0	2	0	1900-01-02	2	2	1	2014-07-01	551	3	2008-11-10
2314	1	2008-11-20	2013-11-11	40	153	44	18.8	3TC+D4T30+NVP	1	1	1	0	2		1	2	2	1	2	2	0	164	0	107.08	50.54	3	9	9	1	2	2	1	2	2	2	2		0	1	2	0	1900-01-02	2	2	1	2014-07-01	232	2	2008-11-28
2316	1	2008-11-24	2013-07-15	56	155	50	20.81	3TC+D4T30+NVP	1	1	0	0	2		1	2	2	1	2	2	0	395	0	89.39	57.79	3	9	2	1	2	2	1	2	2	2	2		0	0	2	0	1900-01-02	2	2	1	2014-07-01	351	3	2008-11-24
232	0	2004-10-19	2012-01-06	35	153	56	23.92	3TC+D4T30+NVP	1	1	0	0	2		1	2	2	1	2	2	9	275	9999999	53	115.38	3	2	2	2	0	0	0	0	0	0	2		0	0	2	0	1900-01-02	2	2	1	2014-07-01	907	3	2004-11-18
2320	0	2009-07-29	2013-11-21	33	148	43	19.63	3TC+D4T30+NVP	1	1	0	0	2		1	2	2	1	2	2	0	879	0	61.95	77.24	3	2	9	2	0	0	0	0	0	0	2		0	0	2	0	1900-01-02	2	2	1	2014-07-01	222	3	2009-07-29
2324	1	2008-12-01	2013-06-24	34	168	54	19.13	3TC+D4T30+EFV600	1	1	0	0	2		1	2	2	1	2	2	0	383	0	99.12	71.03	4	9	9	2	0	0	0	0	0	0	2		0	0	2	0	1900-01-02	2	2	1	2014-07-01	372	3	2008-12-01
2331	1	2008-12-16	2013-09-19	35	159	47	18.59	3TC+D4T30+NVP	1	1	0	0	2		1	2	2	1	2	2	0	435	0	61.06	99.41	4	9	2	2	0	0	0	0	0	0	2		0	0	2	0	1900-01-02	2	2	1	2014-07-01	285	3	2008-12-16
2333	1	2008-12-22	2012-12-06	42	161	50	19.29	3TC+D4T30+NVP	1	1	0	0	2		1	2	2	1	2	2	9	827	0	107.85	55.88	3	9	9	2	0	0	0	0	0	0	2		0	0	2	0	1900-01-02	2	2	1	2014-07-01	572	3	2009-01-07
2335	1	2008-12-22	2012-12-26	64	161	75	28.93	3TC+D4T30+NVP	1	1	1	0	2		1	2	2	1	2	2	0	473	0	90.27	77.67	2	9	9	2	0	0	0	0	0	0	2		0	1	2	0	1900-01-02	2	2	1	2014-07-01	552	3	2008-12-22
2339	1	2008-12-30	2012-10-19	36	162	51	19.43	3TC+D4T30+EFV600	1	1	0	0	2		1	2	2	1	2	2	9	327	0	60.18	108.41	3	2	9	1	2	2	1	2	2	2	2		0	0	2	0	1900-01-02	2	2	1	2014-07-01	620	3	2008-12-30
2341	1	2009-01-02	2013-10-10	39	162	50	19.05	3TC+D4T30+EFV600	1	1	0	0	2		1	2	2	1	2	2	0	496	0	83.19	74.67	3	9	2	2	0	0	0	0	0	0	2		0	0	2	0	1900-01-02	2	2	1	2014-07-01	264	3	2009-01-02
2342	1	2009-01-05	2013-01-23	37	152	47	20.34	3TC+D4T30+NVP	1	1	1	0	2		1	2	2	1	1	2	1	278	0	59.29	100.43	4	1	9	1	2	2	1	2	2	2	2		0	0	2	0	1900-01-02	2	2	1	2014-07-01	524	3	2009-01-05
2343	0	2009-01-05	2013-12-18	30	156	50	20.55	3TC+D4T30+NVP	1	1	0	0	2		1	2	2	1	2	2	0	306	0	64.6	88.54	3	2	9	2	0	0	0	0	0	0	2		0	0	2	0	1900-01-02	2	2	1	2014-07-01	195	3	2009-01-12
2344	1	2008-11-25	2013-10-25	35	165	57	20.94	3TC+D4T30+NVP	1	1	0	0	2		1	2	2	1	2	2	0	828	0	100	73.62	3	1	9	2	0	0	0	0	0	0	2		0	0	2	0	1900-01-02	2	2	1	2014-07-01	249	3	2008-11-25
2347	1	2009-01-07	2013-01-23	35	170	75	25.95	3TC+D4T30+EFV600	1	1	0	0	2		1	2	2	1	2	2	1	561	0	76.11	127.27	3	1	9	2	0	0	0	0	0	0	2		0	0	2	0	1900-01-02	2	2	1	2014-07-01	524	3	2009-07-20
2352	1	2009-01-12	2012-11-29	35	160	55	21.48	3TC+D4T30+EFV600	1	1	0	0	2		1	2	2	1	2	2	0	222	0	117.7	60.35	3	9	2	2	0	0	0	0	0	0	2		0	0	2	0	1900-01-02	2	2	6	2014-07-01	579	3	2009-01-12
2353	0	2009-01-12	2012-07-24	34	153	43	18.37	3TC+D4T30+EFV600	1	1	0	0	2		1	2	2	1	2	2	0	987	0	73.44	64.55	3	2	9	2	0	0	0	0	0	0	2		0	0	2	0	1900-01-02	2	2	1	2014-07-01	707	3	2009-07-28
2356	0	2009-01-13	2013-03-06	28	148	47	21.46	EFV600+FTC+TDF	0	2	0	0	2		1	2	2	1	2	2	1	327	9999999	84.1	65.1	1	1	9	1	2	2	1	2	2	2	2		0	0	2	0	1900-01-02	2	2	1	2014-07-01	482	3	2009-01-13
2358	1	2009-01-14	2013-01-23	34	161	62	23.92	3TC+D4T30+NVP	1	1	1	0	2		1	2	2	1	2	2	0	208	0	92.92	86.99	1	9	9	2	0	0	0	0	0	0	2		0	0	2	0	1900-01-02	2	2	1	2014-07-01	524	3	2009-01-22
236	0	2004-08-19	2012-12-31	30	153	69	29.48	3TC+D4T30+NVP	1	1	1	1	2		1	2	2	1	2	2	9	707	0	69.03	114.35	2	2	1	2	0	0	0	0	0	0	2		1	1	2	0	1900-01-02	2	2	1	2014-07-01	547	3	2004-11-01
2363	0	2009-01-19	2013-08-27	35	149	55	24.77	3TC+D4T30+NVP	1	1	0	0	2		1	2	2	1	2	2	0	711	0	62.83	95.59	3	2	9	2	0	0	0	0	0	0	2		0	0	2	0	1900-01-02	2	2	1	2014-07-01	308	3	2009-01-19
2365	1	2009-01-19	2013-08-13	35	160	54	21.09	3TC+D4T30+EFV600	1	1	0	1	2		1	2	2	1	2	2	0	1126	0	100	69.74	3	9	9	2	0	0	0	0	0	0	2		1	0	2	0	1900-01-02	2	2	1	2014-07-01	322	3	2009-01-19
2369	1	2009-01-26	2013-11-22	32	162	50	19.05	3TC+D4T30+EFV600	1	1	0	0	2		1	2	2	1	2	2	0	457	0	86.73	76.58	4	2	2	2	0	0	0	0	0	0	2		0	0	2	0	1900-01-02	2	2	1	2014-07-01	221	3	2009-01-26
2371	1	2009-01-29	2013-02-26	35	173	61	20.38	3TC+D4T30+NVP	1	1	0	0	2		1	2	2	1	2	2	0	631	9999999	71.68	109.91	3	9	9	2	0	0	0	0	0	0	2		0	0	2	0	1900-01-02	2	2	1	2014-07-01	490	3	2009-01-29
2374	0	2009-01-30	2013-12-24	34	144	41	19.77	3TC+D4T30+NVP	1	1	0	0	2		1	2	2	1	2	2	9	383	0	77.88	58.04	3	2	2	2	0	0	0	0	0	0	2		0	0	2	0	1900-01-02	2	2	1	2014-07-01	189	3	2009-01-13
2378	0	2009-02-02	2013-06-25	46	148	51	23.28	3TC+D4T30+EFV600	1	1	0	0	2		1	2	2	1	2	2	9	495	0	65.49	76.13	3	2	9	2	0	0	0	0	0	0	2		0	0	2	0	1900-01-02	2	2	1	2014-07-01	371	3	2009-02-02
2385	1	2009-02-09	2012-12-12	38	165	59	21.67	EFV600+FTC+TDF	0	2	0	0	2		1	2	2	1	2	2	0	827	9999999	78.8	93.94	3	2	1	2	0	0	0	0	0	0	2		0	0	2	0	1900-01-02	2	2	1	2014-07-01	566	3	2009-02-09
2388	1	2009-02-16	2013-09-19	42	166	70	25.4	3TC+D4T30+EFV600	1	1	0	0	2		1	2	2	1	2	2	0	849	0	96.46	87.47	4	9	9	2	0	0	0	0	0	0	2		0	0	2	0	1900-01-02	2	2	1	2014-07-01	285	3	2009-02-16
2390	0	2009-02-16	2013-01-25	51	145	42	19.98	3TC+D4T30+EFV600	1	1	0	0	2		1	2	2	1	2	2	9	894	0	47.79	81.35	3	9	9	2	0	0	0	0	0	0	2		0	0	2	0	1900-01-02	2	2	1	2014-07-01	522	3	2009-02-19
2393	1	2009-02-17	2013-04-30	33	164	55	20.45	3TC+D4T30+EFV600	1	1	0	0	2		1	2	2	1	2	2	0	164	0	104.43	69.31	3	9	2	1	2	2	1	2	2	2	2		0	0	2	0	1900-01-02	2	2	1	2014-07-01	427	2	2009-02-17
2396	0	2009-02-18	2013-09-18	59	155	47	19.56	3TC+AZT+NVP	1	1	0	0	2		1	2	2	1	2	2	9	860	0	71.68	55.24	3	2	2	2	0	0	0	0	0	0	2		0	0	2	0	1900-01-02	2	2	6	2014-07-01	286	3	2009-02-18
2397	1	2009-02-18	2012-02-03	44	159	52	20.57	3TC+D4T30+NVP	1	1	0	0	2		1	2	2	1	2	2	9	210	9999999	82.31	74.6	3	2	2	1	2	2	1	2	2	2	2		0	0	2	0	1900-01-02	2	2	1	2014-07-01	879	3	2009-02-18
240	1	2004-12-28	2013-05-27	39	163	65	24.46	3TC+D4T+NVP	1	1	1	0	2		1	2	2	1	2	2	0	446	0	68.14	118.51	3	9	9	2	0	0	0	0	0	0	2		0	1	2	0	1900-01-02	2	2	1	2014-07-01	400	3	2005-01-11
2400	1	2009-02-24	2013-11-18	41	161	55	21.22	3TC+D4T30+NVP	1	1	0	0	2		1	2	2	1	2	2	0	848	0	89.38	74.93	3	9	9	2	0	0	0	0	0	0	2		0	0	2	0	1900-01-02	2	2	1	2014-07-01	225	3	2009-02-24
2402	0	2009-02-25	2013-10-23	34	155	48	19.98	3TC+D4T30+EFV600	1	1	0	0	2		2	0	0	0	0	0	0	375	0	59.29	89.25	3	2	9	2	0	0	0	0	0	0	2		0	0	2	0	1900-01-02	2	2	1	2014-07-01	251	3	2009-02-25
2403	0	2009-02-25	2013-02-21	37	156	60	24.65	EFV600+FTC+TDF	0	2	0	0	2		1	2	2	1	1	2	1	337	9999999	65.49	98.14	1	1	2	2	0	0	0	0	0	0	2		0	0	2	0	1900-01-02	2	2	1	2014-07-01	495	3	2009-02-25
2404	0	2009-02-25	2013-03-07	42	152	45	19.48	3TC+D4T30+NVP	1	1	0	0	9		1	2	2	1	2	2	9	507	0	86.73	52.88	4	9	9	2	0	0	0	0	0	0	2		0	0	2	0	1900-01-02	2	2	1	2014-07-01	481	3	2009-02-25
2405	1	2009-02-25	2013-06-25	33	161	62	23.92	3TC+D4T30+EFV600	1	1	0	0	2		1	2	2	1	2	2	0	1215	0	91.16	89.51	3	9	9	2	0	0	0	0	0	0	2		0	0	2	0	1900-01-02	2	2	1	2014-07-01	371	3	2009-02-25
2406	1	2009-02-25	2013-08-26	36	166	67	24.31	3TC+EFV600+TDF	0	2	1	0	2		2	0	0	0	0	0	1	374	9999999	82.31	104.13	1	1	2	2	0	0	0	0	0	0	2		0	0	2	0	1900-01-02	2	2	1	2014-07-01	309	3	2009-02-25
2407	1	2009-02-26	2013-06-24	37	163	50	18.82	3TC+D4T30+NVP	1	1	0	0	2		1	2	2	1	2	2	0	920	0	80.53	78.66	2	9	9	2	0	0	0	0	0	0	2		0	0	2	0	1900-01-02	2	2	1	2014-07-01	372	3	2009-02-26
2410	0	2009-02-26	2013-09-19	28	149	39	17.57	3TC+D4T30+NVP	1	1	0	0	2		1	2	2	1	2	2	1	581	0	64.6	70.32	3	1	9	2	0	0	0	0	0	0	2		0	0	2	0	1900-01-02	2	2	1	2014-07-01	285	3	2009-03-25
2414	1	2009-03-02	2013-05-02	39	162	47	17.91	3TC+D4T30+EFV600	1	1	0	0	2		1	2	2	1	2	2	0	688	0	53.98	108.17	3	9	9	2	0	0	0	0	0	0	2		0	0	2	0	1900-01-02	2	2	1	2014-07-01	425	3	2009-03-09
2418	0	2009-03-12	2013-02-20	16	146	39	18.3	3TC+D4T30+NVP	1	1	0	0	2		1	2	2	1	2	2	0	428	0	49.56	101.48	3	2	2	2	0	0	0	0	0	0	2		0	0	2	0	1900-01-02	2	2	1	2014-07-01	496	3	2009-03-12
2420	0	2009-03-09	2013-07-23	44	159	73	28.88	3TC+D4T30+NVP	1	1	1	0	2		1	2	2	1	2	2	0	553	0	83.3	87.49	3	2	9	2	0	0	0	0	0	0	2		1	1	2	0	1900-01-02	2	2	1	2014-07-01	343	3	2009-03-11
2423	1	2009-03-12	2013-11-19	35	163	69	25.97	3TC+D4T30+NVP	1	1	0	0	2		1	2	2	1	2	2	0	403	0	92.92	95.9	1	9	9	2	0	0	0	0	0	0	2		0	0	2	0	1900-01-02	2	2	1	2014-07-01	224	3	2009-03-12
2425	1	2009-03-13	2013-05-03	32	159	62	24.52	3TC+D4T30+EFV600	1	1	0	0	2		1	2	2	1	2	2	9	669	0	95.58	86.17	3	2	2	2	0	0	0	0	0	0	2		0	0	2	0	1900-01-02	2	2	1	2014-07-01	424	3	2009-03-13
2434	0	2009-03-20	2012-08-07	52	162	48	18.29	3TC+D4T30+NVP	1	1	0	0	2		2	0	0	0	0	0	9	508	3116	38.05	115.45	2	2	9	2	0	0	0	0	0	0	2		0	0	2	0	1900-01-02	2	2	1	2014-07-01	693	3	2009-03-20
2437	1	2009-03-25	2013-02-26	42	166	61	22.14	3TC+D4T30+EFV600	1	1	0	0	2		1	2	2	1	2	2	0	612	0	116.82	62.94	3	9	9	2	0	0	0	0	0	0	2		0	0	2	0	1900-01-02	2	2	1	2014-07-01	490	3	2009-03-25
2442	1	2009-03-30	2013-11-15	27	163	55	20.7	3TC+D4T30+EFV600	1	1	0	0	2		1	2	2	1	2	2	9	300	0	102.66	74.46	4	9	9	1	2	2	1	2	2	2	2		0	0	2	0	1900-01-02	2	2	1	2014-07-01	228	3	2009-03-30
2443	1	2009-03-30	2013-05-08	52	165	62	22.77	3TC+D4T30+NVP	1	1	0	0	2		1	2	2	1	2	2	0	747	0	88.5	75.83	3	9	9	2	0	0	0	0	0	0	2		0	0	2	0	1900-01-02	2	2	1	2014-07-01	419	3	2009-03-31
2446	1	2009-03-31	2013-05-02	37	162	51	19.43	3TC+D4T30+NVP	1	1	0	0	2		1	2	2	1	2	2	1	343	0	76.11	84.89	3	1	9	1	2	2	1	2	2	2	2		0	0	2	0	1900-01-02	2	2	1	2014-07-01	425	3	2009-03-25
2453	0	2009-04-07	2013-05-27	42	157	83	33.67	3TC+D4T30+NVP	1	1	0	0	2		1	2	2	1	2	2	0	634	0	103.54	81.7	3	2	9	2	0	0	0	0	0	0	2		0	0	2	0	1900-01-02	2	2	1	2014-07-01	400	3	2009-04-07
2454	1	2009-04-07	2013-09-24	57	162	57	21.72	3TC+D4T30+EFV600	1	1	0	0	2		1	2	2	1	2	2	0	713	0	112.39	51.78	3	9	9	2	0	0	0	0	0	0	2		0	0	2	0	1900-01-02	2	2	1	2014-07-01	280	3	2009-04-08
2457	1	2009-04-10	2013-01-18	48	156	69	28.35	3TC+D4T30+EFV600	1	1	0	0	2		1	2	2	1	2	2	0	136	0	96.46	80.95	3	9	9	1	2	2	1	2	2	2	2		0	0	2	0	1900-01-02	2	2	1	2014-07-01	529	2	2009-04-11
2463	1	2009-04-27	2013-11-20	36	149	42	18.92	3TC+D4T30+NVP	1	1	0	0	2		1	2	2	1	1	2	0	482	0	85.84	62.59	4	9	9	2	0	0	0	0	0	0	2		0	0	2	0	1900-01-02	2	2	1	2014-07-01	223	3	2009-04-27
2464	0	2009-04-27	2013-07-25	32	153	43	18.37	3TC+D4T30+NVP	1	1	0	0	2		1	2	2	1	2	2	9	241	0	76.99	62.73	3	9	9	2	0	0	0	0	0	0	2		0	0	2	0	1900-01-02	2	2	1	2014-07-01	341	3	2009-05-18
2466	1	2009-04-27	2013-10-22	39	165	57	20.94	3TC+D4T30+NVP	1	1	0	0	2		1	2	2	1	2	2	9	207	0	104.43	67.81	3	9	9	1	2	2	1	2	2	2	2		0	0	2	0	1900-01-02	2	2	1	2014-07-01	252	3	2009-05-18
2468	0	2009-04-29	2013-07-16	38	160	75.5	29.49	3TC+D4T30+NVP	1	1	0	0	2		1	2	2	1	2	2	0	778	0	69.03	116.02	2	2	9	2	0	0	0	0	0	0	2		0	0	2	0	1900-01-02	2	2	1	2014-07-01	350	3	2009-05-28
2471	0	2009-04-30	2012-09-27	41	150	47	20.89	3TC+D4T30+NVP	1	1	0	0	9		1	2	2	1	2	2	9	576	0	94.65	51.13	3	9	9	2	0	0	0	0	0	0	2		0	0	2	0	1900-01-02	2	2	1	2014-07-01	642	3	2009-05-07
2474	1	2009-05-06	2013-08-29	35	162	61	23.24	3TC+D4T30+NVP	1	1	0	0	2		1	2	2	1	2	2	0	600	0	89.39	88.13	3	9	9	2	0	0	0	0	0	0	2		0	0	2	0	1900-01-02	2	2	1	2014-07-01	306	3	2009-05-21
248	1	2005-01-11	2012-02-22	42	166	57	20.69	3TC+D4T+NVP	1	1	0	0	2		1	2	2	1	2	2	9	329	0	67.26	102.15	3	2	9	1	2	2	1	2	2	2	2		0	0	2	0	1900-01-02	2	2	1	2014-07-01	860	3	2005-01-07
2482	0	2009-05-12	2013-11-21	34	153	53	22.64	3TC+D4T30+NVP	1	1	0	0	2		1	2	2	1	2	2	0	324	0	95.58	61.13	3	2	9	1	2	2	1	2	2	2	2		0	0	2	0	1900-01-02	2	2	1	2014-07-01	222	3	2009-05-19
2485	0	2009-05-15	2013-12-20	48	146	44	20.64	3TC+D4T30+NVP	1	1	0	0	2		1	2	2	1	2	2	0	283	0	42.48	99.1	3	2	9	1	2	2	1	2	2	2	2		0	1	2	0	1900-01-02	2	2	1	2014-07-01	193	3	2009-05-15
2489	1	2009-05-18	2013-07-25	41	167	59	21.16	3TC+D4T30+NVP	1	1	0	0	2		1	2	2	1	2	2	0	457	0	100	71.84	3	9	9	2	0	0	0	0	0	0	2		0	0	2	0	1900-01-02	2	2	1	2014-07-01	341	3	2009-05-18
249	0	2004-12-20	2012-10-17	40	156	52	21.37	3TC+D4T30+NVP	1	1	0	0	2		1	2	2	1	1	2	9	257	0	55.75	97	3	2	2	2	0	0	0	0	0	0	2		0	0	2	0	1900-01-02	2	2	1	2014-07-01	622	3	2004-12-20
2492	0	2009-05-19	2012-12-20	42	159	50	19.78	3TC+D4T30+EFV600	1	1	0	0	2		2	0	0	0	0	0	9	306	0	77.88	65.43	3	2	2	2	0	0	0	0	0	0	2		0	0	2	0	1900-01-02	2	2	1	2014-07-01	558	3	2009-05-19
2495	1	2009-05-22	2012-07-17	41	161	50	19.29	3TC+D4T30+NVP	1	1	0	0	2		1	2	2	1	2	2	9	497	0	109.74	55.48	4	9	9	2	0	0	0	0	0	0	2		0	0	2	0	1900-01-02	2	2	1	2014-07-01	714	3	2009-05-22
2498	0	2009-05-25	2013-08-13	16	151	39	17.1	3TC+D4T30+EFV600	1	1	0	0	2		1	2	2	1	2	2	0	718	0	56.64	88.8	3	2	9	2	0	0	0	0	0	0	2		0	0	2	0	1900-01-02	2	2	1	2014-07-01	322	3	2009-05-25
2504	1	2009-05-28	2012-08-21	35	163	50	18.82	3TC+D4T30+NVP	1	1	0	0	2		1	2	2	1	2	2	9	478	0	84.07	76.81	3	2	9	2	0	0	0	0	0	0	2		0	0	2	0	1900-01-02	2	2	1	2014-07-01	679	3	2009-05-28
2508	0	2009-06-01	2013-04-25	25	149	44	19.82	3TC+AZT+NVP	1	1	0	0	2		1	2	2	1	2	2	0	791	0	57.52	91.49	3	2	1	2	0	0	0	0	0	0	2		0	0	2	0	1900-01-02	2	2	1	2014-07-01	432	3	2009-06-02
2509	1	2009-06-02	2013-07-23	32	167	56	20.08	3TC+D4T30+NVP	1	1	0	0	2		1	2	2	1	2	2	0	113	0	80.53	92.38	4	9	9	1	2	2	1	2	2	2	2		0	0	2	0	1900-01-02	2	2	1	2014-07-01	343	2	2009-06-02
2511	0	2009-06-04	2012-10-17	34	160	61	23.83	3TC+D4T30+NVP	1	1	0	0	2		1	2	2	1	2	2	0	494	0	999	999	2	2	9	2	0	0	0	0	0	0	2		0	0	2	0	1900-01-02	2	2	1	2014-07-01	622	3	2009-06-11
2512	1	2009-06-05	2013-12-18	33	153	49	20.93	3TC+D4T30+NVP	1	1	0	0	2		1	2	2	1	2	2	0	1027	0	76.99	83.76	3	9	9	2	0	0	0	0	0	0	2		0	0	2	0	1900-01-02	2	2	1	2014-07-01	195	3	2009-06-05
2515	0	2009-06-08	2012-12-21	38	147	40	18.51	3TC+D4T30+EFV600	1	1	0	0	2		1	2	2	1	2	2	0	234	0	106.54	39.83	4	2	2	2	0	0	0	0	0	0	2		0	0	2	0	1900-01-02	2	2	1	2014-07-01	557	3	2009-06-08
2516	1	2009-06-09	2012-09-20	34	162	54	20.58	3TC+D4T30+NVP	1	1	0	0	2		1	2	2	1	2	2	0	435	0	117.7	59.82	3	2	9	2	0	0	0	0	0	0	2		0	0	2	0	1900-01-02	2	2	1	2014-07-01	649	3	2009-06-09
2517	1	2009-06-09	2012-08-28	29	169	59	20.66	3TC+D4T30+NVP	1	1	0	0	2		1	2	2	1	1	2	9	457	0	100	80.55	3	1	2	2	0	0	0	0	0	0	2		0	0	2	0	1900-01-02	2	2	1	2014-07-01	672	3	2009-06-09
2519	0	2009-06-15	2013-01-17	54	156	49	20.13	3TC+D4T30+NVP	1	1	0	0	2		1	2	2	1	2	2	0	564	9999999	50.45	86.87	3	2	9	2	0	0	0	0	0	0	2		0	0	2	0	1900-01-02	2	2	1	2014-07-01	530	3	2009-06-15
2520	1	2009-06-15	2012-08-24	38	168	63	22.32	3TC+D4T30+EFV600	1	1	0	0	2		1	2	2	1	2	2	0	261	97	112.39	70.33	3	2	2	1	2	2	1	2	2	2	2		0	0	2	0	1900-01-02	2	2	1	2014-07-01	676	3	2009-06-15
2521	1	2009-06-15	2012-12-31	32	169	51	17.86	3TC+D4T30+EFV600	1	1	0	0	2		1	2	2	1	2	2	9	318	0	89.38	75.8	3	2	2	1	2	2	1	2	2	2	2		0	0	2	0	1900-01-02	2	2	1	2014-07-01	547	3	2009-06-15
2524	1	2009-06-16	2012-08-29	47	160	64	25	3TC+D4T30+EFV600	1	1	0	0	2		1	2	2	1	2	2	9	568	81	100.89	72.56	3	9	2	2	0	0	0	0	0	0	2		0	0	2	0	1900-01-02	2	2	1	2014-07-01	671	3	2009-06-15
2525	1	2009-06-19	2013-03-22	38	158	52	20.83	3TC+D4T30+NVP	1	1	0	0	2		1	2	2	1	2	2	0	353	0	82.3	79.27	4	2	9	1	2	2	1	2	2	2	2		0	0	2	0	1900-01-02	2	2	1	2014-07-01	466	3	2009-06-19
2532	0	2009-06-25	2013-11-18	38	140	41	20.92	3TC+EFV600+TDF	0	2	0	0	2		1	2	2	1	2	2	0	43	9999999	77.88	55.85	4	2	9	1	2	2	1	2	2	2	2		0	0	2	0	1900-01-02	2	2	1	2014-07-01	225	1	2009-06-25
2533	1	2009-06-25	2013-06-21	41	176	65	20.98	3TC+D4T30+NVP	1	1	0	0	2		1	2	2	1	2	2	0	531	0	83.19	95.14	2	9	9	2	0	0	0	0	0	0	2		0	0	2	0	1900-01-02	2	2	1	2014-07-01	375	3	2009-06-25
2536	1	2009-06-29	2013-02-19	38	161	73	28.16	3TC+D4T30+NVP	1	1	0	0	2		1	2	2	1	2	2	1	321	0	80.53	113.73	3	1	9	1	2	2	1	2	2	2	2		0	0	2	0	1900-01-02	2	2	1	2014-07-01	497	3	2009-06-29
2537	0	2009-06-29	2013-05-28	41	153	61	26.06	3TC+EFV600+TDF	0	2	0	0	2		2	0	0	0	0	0	0	779	9999999	61.9	101.46	2	2	9	2	0	0	0	0	0	0	2		0	0	2	0	1900-01-02	2	2	1	2014-07-01	399	3	2009-06-30
2538	1	2009-06-29	2013-08-22	37	163	75	28.23	3TC+D4T30+EFV600	1	1	0	0	2		1	2	2	1	2	2	0	475	0	107.08	88.74	3	9	9	2	0	0	0	0	0	0	2		0	0	2	0	1900-01-02	2	2	1	2014-07-01	313	3	2009-06-29
2539	0	2009-06-29	2013-10-09	37	151	42	18.42	3TC+D4T30+NVP	1	1	0	0	2		1	2	2	1	2	2	0	413	0	63.72	70.61	3	2	9	1	2	2	1	2	2	2	2		0	0	2	0	1900-01-02	2	2	1	2014-07-01	265	3	2009-06-29
2546	1	2009-07-02	2012-10-26	37	161	51	19.68	3TC+D4T30+NVP	1	1	1	0	2		1	2	2	1	2	2	9	325	0	59.29	108.98	4	2	9	1	2	2	1	2	2	2	2		0	1	2	0	1900-01-02	2	2	1	2014-07-01	613	3	2009-07-02
255	0	2005-01-11	2013-12-09	34	159	51	20.17	3TC+D4T30+NVP	1	1	0	0	2		1	1	2	1	2	2	0	566	9999999	81.42	69.05	4	2	9	2	0	0	0	0	0	0	2		0	0	2	0	1900-01-02	2	2	1	2014-07-01	204	3	2005-01-11
2557	1	2009-07-13	2013-01-16	42	166	57	20.69	3TC+D4T30+NVP	1	1	0	0	2		1	2	2	1	2	2	0	365	0	123.9	55.45	3	9	2	1	2	2	1	2	2	2	2		0	0	2	0	1900-01-02	2	2	1	2014-07-01	531	3	2009-07-13
2558	0	2009-07-13	2013-11-21	33	149	49	22.07	3TC+D4T30+NVP	1	1	0	0	2		1	2	2	1	2	2	0	799	0	64.61	84.39	1	2	9	2	0	0	0	0	0	0	2		0	0	2	0	1900-01-02	2	2	1	2014-07-01	222	3	2009-07-13
2561	1	2009-07-16	2013-09-20	30	158	49	19.63	3TC+D4T30+EFV600	1	1	0	0	2		1	2	2	1	2	2	0	799	0	68.14	97.3	3	9	9	2	0	0	0	0	0	0	2		0	0	2	0	1900-01-02	2	2	1	2014-07-01	284	3	2009-07-16
2568	1	2009-07-23	2012-12-26	53	163	65	24.46	3TC+D4T30+NVP	1	1	0	0	2		1	2	2	1	2	2	9	262	0	126.55	54.96	3	2	2	1	2	2	1	2	2	2	2		0	0	2	0	1900-01-02	2	2	1	2014-07-01	552	3	2009-07-23
2569	0	2009-07-23	2013-05-28	42	150	53	23.56	3TC+EFV600+TDF	0	2	1	0	2		1	2	2	1	2	2	0	339	9999999	69	78.29	1	2	9	1	2	2	1	2	2	2	2		1	1	2	0	1900-01-02	2	2	1	2014-07-01	399	3	2009-07-23
2571	1	2009-07-27	2013-11-20	33	162	55	20.96	3TC+D4T30+NVP	1	1	0	0	2		1	2	2	1	2	2	0	536	0	119.4	60.62	2	9	9	2	0	0	0	0	0	0	2		0	0	2	0	1900-01-02	2	2	1	2014-07-01	223	3	2009-07-27
2573	0	2009-11-25	2013-12-13	32	161	57	21.99	3TC+D4T30+NVP	1	1	0	0	2		1	2	2	1	2	2	0	679	0	72.57	88.22	2	2	2	2	0	0	0	0	0	0	2		0	0	2	0	1900-01-02	2	2	1	2014-07-01	200	3	2009-11-25
2574	1	2009-07-27	2013-09-19	37	158	57	22.83	3TC+D4T30+EFV600	1	1	0	0	2		1	2	2	1	2	2	0	809	0	103.54	69.74	3	9	9	2	0	0	0	0	0	0	2		0	0	2	0	1900-01-02	2	2	1	2014-07-01	285	3	2009-07-27
2575	1	2009-07-28	2012-08-23	50	168	63	22.32	3TC+D4T30+NVP	1	1	0	0	2		1	2	2	1	2	2	0	237	0	131.86	52.89	3	9	9	1	2	2	1	2	2	2	2		0	1	2	0	1900-01-02	2	2	1	2014-07-01	677	3	2009-07-28
2576	0	2009-07-28	2013-09-19	46	146	52	24.39	3TC+D4T30+NVP	1	1	0	0	2		1	2	2	1	2	2	0	970	0	53.98	94.17	1	2	9	2	0	0	0	0	0	0	2		0	0	2	0	1900-01-02	2	2	1	2014-07-01	285	3	2009-07-28
2577	0	2009-08-03	2013-09-19	35	150	57	25.33	3TC+D4T30+NVP	1	1	0	0	2		1	2	2	1	2	2	0	1157	0	59.3	104.96	2	2	9	2	0	0	0	0	0	0	2		0	0	2	0	1900-01-02	2	2	1	2014-07-01	285	3	2009-08-03
2580	1	2009-08-03	2013-07-23	25	167	54	19.36	3TC+D4T30+NVP	1	1	0	0	2		1	2	2	1	2	2	0	445	0	94.69	80.67	3	9	9	2	0	0	0	0	0	0	2		0	0	2	0	1900-01-02	2	2	1	2014-07-01	343	3	2009-08-04
2581	1	2009-08-05	2012-10-18	37	169	62	21.71	3TC+D4T30+EFV600	1	1	0	0	2		1	2	2	1	2	2	9	592	0	89.38	87.88	3	2	9	1	2	2	1	2	2	2	2		0	0	2	0	1900-01-02	2	2	1	2014-07-01	621	3	2009-08-05
2584	1	2009-08-10	2013-03-19	31	158	50	20.03	3TC+D4T30+EFV600	1	1	1	0	2		1	2	2	1	2	2	0	380	0	84.07	79.74	3	9	9	2	0	0	0	0	0	0	2		0	1	2	0	1900-01-02	1	2	4	2013-09-27	192	3	2009-08-10
2585	0	2009-08-10	2013-03-21	28	141	37	18.61	EFV600+FTC+TDF	0	2	0	0	2		1	2	2	1	2	2	0	293	9999999	69.9	61.66	1	2	9	2	0	0	0	0	0	0	2		0	0	2	0	1900-01-02	2	2	1	2014-07-01	467	3	2009-08-10
2605	0	2009-08-25	2013-05-16	32	164	57	21.19	3TC+D4T30+NVP	1	1	0	0	2		1	2	2	1	2	2	0	564	0	78.77	81.28	3	2	9	2	0	0	0	0	0	0	2		0	0	2	0	1900-01-02	2	2	1	2014-07-01	411	3	2009-08-25
2608	1	2009-08-27	2013-10-22	40	159	51	20.17	3TC+D4T30+EFV600	1	1	0	0	2		1	2	2	1	2	2	0	1000	0	118.59	52.9	3	2	9	2	0	0	0	0	0	0	2		0	0	2	0	1900-01-02	2	2	1	2014-07-01	252	3	2009-08-27
2611	1	2009-09-02	2012-10-16	42	153	50	21.36	3TC+D4T30+EFV600	1	1	0	0	2		1	2	2	1	2	2	0	653	0	67.26	89.61	4	2	2	2	0	0	0	0	0	0	2		0	0	2	0	1900-01-02	2	2	1	2014-07-01	623	3	2009-09-02
2616	1	2009-09-08	2013-01-31	35	164	62	23.05	3TC+D4T30+EFV600	1	1	0	0	2		1	2	2	1	2	2	0	587	0	130.98	61.13	4	9	9	2	0	0	0	0	0	0	2		0	0	2	0	1900-01-02	2	2	1	2014-07-01	516	3	2009-09-08
2618	0	2009-09-14	2013-11-18	43	151	56	24.56	3TC+D4T30+EFV600	1	1	0	0	9		1	2	2	1	2	2	0	452	0	74.34	75.99	3	2	9	2	0	0	0	0	0	0	2		0	0	2	0	1900-01-02	2	2	1	2014-07-01	225	3	2009-09-14
2621	1	2009-09-18	2013-04-29	31	159	58	22.94	3TC+D4T30+NVP	1	1	0	0	2		1	2	2	1	1	2	0	387	0	80.53	96.56	3	2	9	1	2	2	1	2	2	2	2		0	0	2	0	1900-01-02	2	2	1	2014-07-01	428	3	2009-09-18
2625	1	2009-09-28	2013-03-19	31	165	53	19.47	3TC+D4T30+EFV600	1	1	0	0	2		1	2	2	1	2	2	0	328	0	70.8	100.36	4	9	9	1	2	2	1	2	2	2	2		0	0	2	0	1900-01-02	2	2	1	2014-07-01	469	3	2009-09-28
2634	0	2009-10-07	2013-10-09	43	150	44	19.56	3TC+AZT+NVP	1	1	0	0	2		1	2	2	1	2	2	9	778	0	74.87	59.29	3	9	9	2	0	0	0	0	0	0	2		0	0	2	0	1900-01-02	2	2	1	2014-07-01	265	3	2009-10-07
2636	1	2009-10-12	2013-08-14	48	170	59	20.42	3TC+AZT+NVP	1	2	0	0	2		1	2	2	1	2	2	0	436	9999999	110.62	60.35	3	9	9	2	0	0	0	0	0	0	2		0	0	2	0	1900-01-02	2	2	1	2014-07-01	321	3	2009-10-12
2638	1	2009-10-12	2012-01-26	26	153	43	18.37	EFV600+FTC+TDF	0	2	0	0	2		1	2	2	1	2	2	0	51	9999999	84	71.78	4	2	2	1	2	2	1	2	2	2	2		0	0	2	0	1900-01-02	2	2	1	2014-07-01	887	1	2009-10-13
2643	1	2009-10-26	2012-10-18	33	169	58	20.31	3TC+D4T30+NVP	1	1	0	0	2		1	2	2	1	2	2	0	278	0	78.76	96.92	3	9	9	2	0	0	0	0	0	0	2		0	0	2	0	1900-01-02	2	2	1	2014-07-01	621	3	2009-10-26
2644	1	2009-10-27	2013-07-16	30	162	47	17.91	3TC+D4T30+EFV600	1	1	0	0	2		1	2	2	1	2	2	9	599	0	78.76	80.74	4	2	9	2	0	0	0	0	0	0	2		0	0	2	0	1900-01-02	2	2	1	2014-07-01	350	3	2009-10-27
2648	1	2009-11-02	2012-03-13	53	152	47	20.34	3TC+D4T30+NVP	1	1	0	0	2		1	2	2	1	2	2	9	586	9999999	92.04	54.64	3	2	2	2	0	0	0	0	0	0	2		0	0	2	0	1900-01-02	2	2	6	2014-07-01	840	3	2009-11-02
2654	1	2009-11-10	2013-12-13	31	159	67	26.5	3TC+D4T30+NVP	1	1	0	0	2		1	2	2	1	2	2	0	908	0	77	116.66	4	9	9	2	0	0	0	0	0	0	2		0	0	2	0	1900-01-02	2	2	1	2014-07-01	200	3	2009-11-10
2662	0	2009-11-17	2012-10-23	27	147	51	23.6	EFV600+FTC+TDF	0	2	0	0	2		1	2	2	1	2	2	0	337	9999999	63.7	94.09	2	2	9	2	0	0	0	0	0	0	2		0	0	2	0	1900-01-02	2	2	1	2014-07-01	616	3	2010-05-25
2663	1	2009-11-17	2013-06-20	36	166	57	20.69	3TC+D4T30+EFV600	1	1	0	0	2		1	2	2	1	2	2	0	362	0	129.21	56.43	3	9	9	1	2	2	1	2	2	2	2		0	0	2	0	1900-01-02	2	2	1	2014-07-01	376	3	2009-11-17
2666	0	2009-11-19	2013-02-28	45	155	50	20.81	3TC+D4T30+NVP	1	1	0	0	2		1	2	2	1	2	2	0	344	0	60.18	82.09	4	2	9	1	2	2	1	2	2	2	2		0	0	2	0	1900-01-02	2	2	1	2014-07-01	488	3	2009-11-20
2668	0	2009-11-20	2013-11-07	46	151	50	21.93	3TC+D4T30+NVP	1	1	0	0	2		1	2	2	1	2	2	0	742	0	76.99	63.49	3	2	9	2	0	0	0	0	0	0	2		0	0	2	0	1900-01-02	2	2	1	2014-07-01	236	3	2009-11-20
2670	0	2010-08-04	2013-05-14	53	143	42.5	20.78	3TC+AZT+NVP	1	1	0	0	2		1	2	2	1	2	2	0	821	0	46.9	81.99	3	2	2	2	0	0	0	0	0	0	2		0	0	2	0	1900-01-02	2	2	1	2014-07-01	413	3	2010-08-04
2671	1	2009-11-30	2013-06-10	33	166	60	21.77	3TC+D4T30+NVP	1	1	1	0	2		1	2	2	1	2	2	0	464	0	120.36	65.61	3	9	9	1	2	2	1	2	2	2	2		0	1	2	0	1900-01-02	2	2	1	2014-07-01	386	3	2009-11-26
2679	0	2009-12-09	2013-08-22	49	148	60	27.39	3TC+D4T30+NVP	1	1	0	0	2		1	2	2	1	2	2	0	682	0	56.64	100.25	2	2	9	2	0	0	0	0	0	0	2		0	0	2	0	1900-01-02	2	2	1	2014-07-01	313	3	2009-12-09
2680	0	2009-12-09	2012-11-05	50	143	43	21.03	3TC+D4T30+EFV600	1	1	0	1	2		1	2	2	1	2	2	0	1119	9999999	60.2	66.86	3	9	9	2	0	0	0	0	0	0	2		1	0	2	0	1900-01-02	2	2	1	2014-07-01	603	3	2009-12-09
2682	1	2009-12-10	2013-01-24	58	167	56	20.08	3TC+D4T30+EFV600	1	1	1	0	2		1	2	2	1	2	2	0	557	9999999	98.2	57.52	3	9	9	2	0	0	0	0	0	0	2		0	1	2	0	1900-01-02	1	2	4	2014-01-06	347	3	2009-12-10
2685	1	2009-12-21	2013-02-21	34	159	56	22.15	3TC+D4T30+EFV600	1	1	0	0	2		1	2	2	1	2	2	1	473	0	84.07	86.85	3	1	9	2	0	0	0	0	0	0	2		0	0	2	0	1900-01-02	2	2	1	2014-07-01	495	3	2009-12-21
2686	0	2009-12-21	2013-05-28	38	152	50	21.64	3TC+D4T30+EFV600	1	1	0	0	2		1	2	2	1	1	2	0	551	0	67.26	78.86	4	2	2	2	0	0	0	0	0	0	2		0	0	2	0	1900-01-02	2	2	1	2014-07-01	399	3	2009-12-21
2688	1	2009-12-22	2013-11-14	35	170	68	23.53	3TC+D4T30+EFV600	1	1	0	0	2		1	2	2	1	2	2	0	204	0	99.12	88.6	3	9	9	1	2	2	1	2	2	2	2		0	0	2	0	1900-01-02	2	2	1	2014-07-01	229	3	2009-12-22
2691	0	2009-12-23	2013-01-14	40	157	63	25.56	3TC+D4T30+EFV600	1	1	0	0	2		1	2	2	1	2	2	0	446	0	77.8	84.22	4	2	2	2	0	0	0	0	0	0	2		0	0	2	0	1900-01-02	2	2	1	2014-07-01	533	3	2009-11-27
2692	0	2009-12-24	2013-09-05	38	157	60	24.34	3TC+D4T30+NVP	1	1	1	0	2		1	2	2	1	2	2	0	425	0	53.98	117.91	3	2	2	2	0	0	0	0	0	0	2		0	1	2	0	1900-01-02	2	2	1	2014-07-01	299	3	2009-11-26
2693	1	2009-12-24	2013-10-24	43	155	53	22.06	3TC+D4T30+EFV600	1	1	0	0	2		1	2	2	1	2	2	0	283	0	102.66	61.6	3	9	9	1	2	2	1	2	2	2	2		0	0	2	0	1900-01-02	2	2	1	2014-07-01	250	3	2009-12-17
2694	0	2009-12-29	2013-11-04	33	142	40	19.84	3TC+D4T30+EFV600	1	1	0	0	9		1	2	2	1	2	2	0	9999	0	61.95	71.85	4	2	2	1	2	2	1	2	2	2	2		0	0	2	0	1900-01-02	2	2	1	2014-07-01	239	3	2009-12-29
2696	1	2009-12-30	2013-09-19	51	166	53	19.23	3TC+D4T30+EFV600	1	1	0	0	2		1	2	2	1	2	2	9	326	0	99.12	58.53	3	9	9	1	2	2	1	2	2	2	2		0	0	2	0	1900-01-02	2	2	1	2014-07-01	285	3	2009-12-29
2697	1	2009-12-30	2013-11-08	41	166	85	30.85	3TC+D4T30+EFV600	1	1	1	0	2		1	2	2	1	2	2	0	992	9999999	80.5	128.58	3	9	9	2	0	0	0	0	0	0	2		0	1	2	0	1900-01-02	2	2	1	2014-07-01	235	3	2009-12-30
2698	1	2009-12-31	2013-02-07	42	158	62	24.84	3TC+D4T30+EFV600	1	1	0	0	2		1	2	2	1	2	2	0	440	9999999	81.48	91.72	3	9	9	1	2	2	1	2	2	2	2		0	0	2	0	1900-01-02	2	2	1	2014-07-01	509	3	2009-12-31
2702	1	2010-01-05	2013-02-25	31	160	55	21.48	3TC+D4T30+EFV600	1	1	0	0	2		1	2	2	1	2	2	0	450	0	76.99	95.78	3	9	9	2	0	0	0	0	0	0	2		0	0	2	0	1900-01-02	2	2	1	2014-07-01	491	3	2010-01-05
2709	1	2010-01-11	2013-01-03	35	167	54	19.36	EFV600+FTC+TDF	0	2	0	0	2		2	0	0	0	0	0	0	650	9999999	92.92	75.05	3	2	1	2	0	0	0	0	0	0	2		1	0	2	0	1900-01-02	2	2	1	2014-07-01	544	3	2010-01-11
2712	0	2010-01-14	2013-01-21	35	160	58	22.66	3TC+D4T30+NVP	1	1	0	0	2		1	2	2	1	2	2	0	828	0	56.64	111.82	3	2	2	2	0	0	0	0	0	0	2		0	0	2	0	1900-01-02	2	2	1	2014-07-01	526	3	2010-01-14
2718	0	2010-01-21	2013-11-07	33	163	49	18.44	3TC+D4T30+NVP	1	1	0	0	2		1	2	2	1	2	2	0	348	0	86.73	62.87	4	2	2	1	2	2	1	2	2	2	2		0	0	2	0	1900-01-02	2	2	1	2014-07-01	236	3	2010-01-21
2723	1	2010-01-27	2013-02-21	40	160	55	21.48	3TC+D4T30+EFV600	1	1	0	0	2		1	2	2	1	2	2	0	172	0	86.73	78	3	9	9	1	2	2	1	2	2	2	2		0	0	2	0	1900-01-02	2	2	1	2014-07-01	495	2	2010-01-21
2727	1	2010-02-01	2013-10-23	42	174	71	23.45	3TC+D4T30+NVP	1	1	0	0	2		1	2	2	1	2	2	0	663	0	108.85	78.63	3	9	9	2	0	0	0	0	0	0	2		0	0	2	0	1900-01-02	2	2	1	2014-07-01	251	3	2010-02-01
2729	0	2010-02-03	2013-06-20	51	152	42	18.18	3TC+D4T30+NVP	1	1	0	0	2		1	2	2	1	2	2	0	622	0	53.1	73.21	3	2	2	2	0	0	0	0	0	0	2		0	0	2	0	1900-01-02	2	2	6	2014-07-01	376	3	2010-02-03
2732	0	2010-02-08	2013-06-19	48	151	58	25.44	3TC+EFV600+TDF	0	2	0	0	2		1	2	2	1	2	2	0	411	9999999	84.96	65.32	3	2	9	2	2	2	2	2	2	2	2		0	0	2	0	1900-01-02	2	2	1	2014-07-01	377	3	2010-02-08
2733	1	2010-02-08	2013-09-11	31	165	63	23.14	3TC+D4T30+EFV600	1	1	0	0	2		1	2	2	1	1	2	0	365	0	91.15	92.66	4	9	9	1	2	2	1	2	2	2	2		0	0	2	0	1900-01-02	2	2	1	2014-07-01	293	3	2010-02-08
2737	1	2010-02-15	2013-01-21	44	166	59	21.41	3TC+D4T30+NVP	1	1	0	0	2		1	2	2	1	2	2	0	290	0	103.54	67.29	4	9	9	1	2	2	1	2	2	2	2		0	0	2	0	1900-01-02	2	2	1	2014-07-01	526	3	2010-02-15
2748	1	2010-03-08	2013-10-25	40	161	60	23.15	3TC+D4T30+NVP	1	1	0	0	2		1	2	2	1	2	2	0	280	0	76.99	95.86	3	9	9	1	2	2	1	2	2	2	2		0	0	2	0	1900-01-02	2	2	1	2014-07-01	249	3	2010-03-08
2750	0	2010-03-15	2012-08-23	45	149	46	20.72	3TC+D4T30+EFV600	1	1	0	0	2		1	2	2	1	2	2	0	400	0	69.91	65.01	3	2	9	2	0	0	0	0	0	0	2		0	0	2	0	1900-01-02	2	2	1	2014-07-01	677	3	2010-03-15
2753	1	2010-03-10	2013-02-20	28	161	62	23.92	3TC+D4T30+NVP	1	1	0	0	2		1	2	2	1	2	2	9	364	0	100	85.41	4	2	2	1	2	2	1	2	2	2	2		0	0	2	0	1900-01-02	2	2	1	2014-07-01	496	3	2010-03-10
2760	1	2010-03-16	2013-09-05	41	158	66	26.44	3TC+D4T30+NVP	1	1	1	0	2		1	2	2	1	2	2	0	182	0	104.43	76.96	3	9	2	1	2	2	1	2	2	2	2		0	1	2	0	1900-01-02	2	2	1	2014-07-01	299	2	2010-03-16
2764	1	2010-03-18	2013-09-05	38	161	53	20.45	3TC+D4T30+NVP	1	1	0	0	2		1	2	2	1	2	2	0	175	0	100	66.49	3	2	1	1	2	2	1	2	2	2	2		0	0	2	0	1900-01-02	2	2	1	2014-07-01	299	2	2010-03-18
2766	1	2010-03-22	2013-09-12	50	152	55	23.81	3TC+D4T30+EFV600	1	1	0	0	2		1	2	2	1	2	2	0	494	0	87.61	69.5	3	9	9	2	0	0	0	0	0	0	2		0	0	2	0	1900-01-02	2	2	1	2014-07-01	292	3	2010-03-22
2767	0	2010-03-22	2013-03-22	45	158	62	24.84	3TC+D4T30+EFV600	1	1	0	0	2		1	2	2	1	2	2	9	609	0	57.53	106.48	4	9	9	2	0	0	0	0	0	0	2		0	0	2	0	1900-01-02	2	2	1	2014-07-01	466	3	2010-03-22
2771	1	2010-03-25	2013-02-20	42	154	50	21.08	3TC+D4T30+NVP	1	1	0	0	2		1	2	2	1	2	2	0	467	0	59.29	101.65	4	9	9	2	0	0	0	0	0	0	2		0	0	2	0	1900-01-02	2	2	1	2014-07-01	496	3	2010-03-25
2774	1	2010-03-29	2013-01-17	40	157	47	19.07	3TC+D4T30+NVP	1	1	0	0	2		1	2	2	1	2	2	0	382	0	75.22	76.85	4	9	9	1	2	2	1	2	2	2	2		0	1	2	0	1900-01-02	2	2	1	2014-07-01	530	3	2010-03-29
2776	0	2010-03-29	2013-08-30	16	143	42	20.54	3TC+D4T30+NVP	1	1	0	0	2		1	2	2	1	2	2	9	512	0	68.14	79.49	3	9	9	1	2	2	1	2	2	2	2		0	0	2	0	1900-01-02	2	2	1	2014-07-01	305	3	2010-03-29
2777	0	2010-03-30	2012-11-07	27	153	45	19.22	3TC+AZT+NVP	1	1	0	0	2		1	2	2	1	2	2	0	434	9999999	45.1	117.26	4	2	2	1	2	2	1	2	2	2	2		0	0	2	0	1900-01-02	2	2	1	2014-07-01	601	3	2010-09-01
2787	0	2010-04-19	2013-02-05	32	157	62	25.15	3TC+D4T30+EFV600	1	1	0	0	2		1	2	2	1	2	2	9	731	0	69.03	100.88	3	9	9	2	0	0	0	0	0	0	2		0	0	2	0	1900-01-02	2	2	1	2014-07-01	511	3	2010-04-20
2788	1	2010-04-19	2013-09-03	32	155	48	19.98	3TC+D4T30+EFV600	1	1	0	0	2		1	2	2	1	2	2	0	505	0	106.2	60.04	4	9	9	1	2	2	1	2	2	2	2		0	0	2	0	1900-01-02	2	2	1	2014-07-01	301	3	2010-04-20
2789	1	2010-04-19	2012-12-15	36	166	56	20.32	3TC+D4T30+EFV600	1	1	0	0	2		1	2	2	1	2	2	0	448	0	93.04	76.99	4	9	9	1	2	2	1	2	2	2	2		0	0	2	0	1900-01-02	2	2	1	2014-07-01	563	3	2010-04-19
2791	1	2010-04-19	2013-03-15	39	163	81	30.49	3TC+D4T30+EFV600	1	1	0	0	2		1	2	2	1	2	2	0	507	0	113.28	88.83	3	9	9	2	0	0	0	0	0	0	2		0	0	2	0	1900-01-02	2	2	1	2014-07-01	473	3	2010-04-19
2796	1	2010-04-21	2013-05-22	40	155	62	25.81	3TC+D4T30+EFV600	1	1	0	0	2		1	2	2	1	2	2	0	634	0	101.77	74.93	4	9	9	2	0	0	0	0	0	0	2		0	1	2	0	1900-01-02	2	2	1	2014-07-01	405	3	2010-04-21
280	1	2005-02-07	2013-02-20	37	167	58	20.8	3TC+D4T+NVP	1	1	0	0	2		1	2	2	1	2	2	0	565	0	73.45	100.04	3	9	9	2	0	0	0	0	0	0	2		0	0	2	0	1900-01-02	2	2	1	2014-07-01	496	3	2005-02-07
2800	0	2010-04-29	2013-06-03	48	155	49	20.4	3TC+D4T30+EFV600	1	1	0	0	2		1	2	2	1	2	2	0	365	0	82.31	56.96	3	2	2	2	0	0	0	0	0	0	2		0	0	2	0	1900-01-02	2	2	1	2014-07-01	393	3	2010-03-26
2804	1	2010-05-04	2013-02-19	30	162	51	19.43	3TC+D4T30+NVP	1	1	0	0	2		1	2	2	1	2	2	0	92	0	75.28	91.66	3	9	9	1	2	2	1	2	2	2	2		0	0	2	0	1900-01-02	2	2	1	2014-07-01	497	1	2010-05-04
2806	1	2010-05-05	2012-10-16	44	161	55	21.22	3TC+D4T30+NVP	1	1	0	0	2		1	2	2	1	2	2	0	260	0	74.34	87.36	3	9	9	1	2	2	1	2	2	2	2		0	0	2	0	1900-01-02	2	2	1	2014-07-01	623	3	2010-05-05
2812	1	2010-05-11	2012-10-15	38	161	55	21.22	3TC+D4T30+EFV600	1	1	0	0	2		1	2	2	1	1	2	0	308	0	59.2	116.56	3	9	9	1	2	2	1	2	2	2	2		0	0	2	0	1900-01-02	2	2	1	2014-07-01	624	3	2010-05-11
2816	0	2010-05-12	2013-09-03	41	151	49	21.49	3TC+D4T30+NVP	1	1	0	0	2		1	2	2	1	2	2	0	688	0	74.34	67.86	3	2	2	2	0	0	0	0	0	0	2		0	0	2	0	1900-01-02	2	2	1	2014-07-01	301	3	2010-05-12
2817	1	2010-05-12	2013-10-09	48	164	59	21.94	3TC+D4T30+NVP	1	1	0	0	2		1	2	2	1	2	2	0	463	0	106.2	62.87	3	9	9	2	0	0	0	0	0	0	2		0	0	2	0	1900-01-02	2	2	1	2014-07-01	265	3	2010-05-12
2820	1	2010-05-14	2012-10-16	40	166	52	18.87	3TC+D4T30+NVP	1	1	0	0	2		1	2	2	1	2	2	0	232	0	76.11	84.04	2	9	2	1	2	2	1	2	2	2	2		0	0	2	0	1900-01-02	2	2	1	2014-07-01	623	3	2010-05-14
2826	1	2010-05-20	2013-03-27	33	166	54	19.6	3TC+D4T30+NVP	1	1	0	0	2		1	2	2	1	2	2	9	232	0	89.4	79.5	4	9	9	1	2	2	1	2	2	2	2		0	0	2	0	1900-01-02	2	2	3	2013-12-31	279	3	2010-05-14
283	1	2005-02-17	2013-05-28	44	166	50	18.14	3TC+D4T30+EFV600	1	1	0	0	2		1	2	2	1	2	2	0	366	0	88.5	66.71	3	9	9	2	0	0	0	0	0	0	2		0	0	2	0	1900-01-02	2	2	1	2014-07-01	399	3	2005-02-17
2831	1	2010-05-24	2013-11-19	50	167	66	23.67	3TC+D4T30+NVP	1	1	0	0	2		1	2	2	1	2	2	0	681	0	96.46	75.74	3	9	9	2	0	0	0	0	0	0	2		0	0	2	0	1900-01-02	2	2	1	2014-07-01	224	3	2010-05-24
2832	1	2010-05-24	2013-01-24	41	166	61	22.14	3TC+D4T30+NVP	1	1	0	0	2		1	2	2	1	2	2	0	497	0	78.76	94.31	3	2	2	2	0	0	0	0	0	0	2		0	0	2	0	1900-01-02	2	2	1	2014-07-01	523	3	2010-05-24
2833	0	2010-05-24	2012-05-03	49	143	42	20.54	3TC+D4T30+EFV600	1	1	0	0	2		1	2	2	1	2	2	0	758	9999999	67.26	59.1	4	2	2	2	0	0	0	0	0	0	2		0	0	2	0	1900-01-02	2	2	1	2014-07-01	789	3	2010-05-24
2834	1	2010-05-24	2013-11-19	44	165	53	19.47	3TC+D4T30+EFV600	1	1	0	0	2		1	2	2	1	2	2	0	319	0	95.58	65.48	4	2	2	1	2	2	1	2	2	2	2		0	0	2	0	1900-01-02	2	2	1	2014-07-01	224	3	2010-05-17
2835	1	2010-05-25	2013-08-28	27	159	56	22.15	3TC+D4T30+NVP	1	1	0	0	2		1	2	2	1	2	2	0	443	0	95.58	81.43	3	9	9	2	0	0	0	0	0	0	2		0	0	2	0	1900-01-02	2	2	1	2014-07-01	307	3	2010-05-25
2838	1	2010-05-26	2012-10-19	37	166	51	18.51	3TC+D4T30+EFV600	1	1	0	0	2		1	2	2	1	1	2	0	246	0	100	64.61	4	9	9	1	2	2	1	2	2	2	2		0	0	2	0	1900-01-02	2	2	1	2014-07-01	620	3	2010-05-27
2839	1	2010-06-02	2012-11-26	37	160	54	21.09	3TC+D4T30+EFV600	1	1	0	0	2		1	2	2	1	2	2	9	695	0	74.34	92.03	4	2	9	1	2	2	1	2	2	2	2		0	0	2	0	1900-01-02	2	2	1	2014-07-01	582	3	2010-06-02
284	0	2005-02-12	2013-03-27	35	147	46	21.29	3TC+D4T30+NVP	1	1	0	0	2		1	2	2	1	2	2	0	575	0	86.7	57.94	2	9	9	2	0	0	0	0	0	0	2		0	0	2	0	1900-01-02	2	2	1	2014-07-01	461	3	2005-07-26
2840	1	2010-06-03	2012-10-19	52	168	49	17.36	3TC+D4T30+EFV600	1	1	0	0	2		1	2	2	1	2	2	0	167	0	66.37	79.91	4	9	1	1	2	2	1	2	2	2	2		0	0	2	0	1900-01-02	2	2	1	2014-07-01	620	2	2010-06-03
2842	1	2010-06-04	2013-09-24	47	164	60	22.31	3TC+D4T30+NVP	1	1	0	0	2		1	2	2	1	2	2	0	379	0	108.85	63.05	3	9	9	2	0	0	0	0	0	0	2		0	0	2	0	1900-01-02	2	2	1	2014-07-01	280	3	2010-06-04
2845	0	2010-06-07	2013-02-19	36	159	65	25.71	3TC+D4T30+NVP	1	1	0	0	2		1	2	2	1	2	2	0	518	0	58.41	120.36	3	2	9	2	0	0	0	0	0	0	2		0	0	2	0	1900-01-02	2	2	1	2014-07-01	497	3	2010-06-07
2847	1	2010-06-08	2012-11-29	42	149	43	19.37	3TC+D4T30+EFV600	1	1	0	0	2		1	2	2	1	2	2	0	246	0	92.92	55.78	3	2	1	1	2	2	1	2	2	2	2		0	0	2	0	1900-01-02	2	2	1	2014-07-01	579	3	2010-06-08
2849	0	2010-06-10	2013-01-22	36	154	63	26.56	3TC+D4T30+NVP	1	1	0	0	2		1	2	2	1	2	2	0	608	0	46.02	148.07	4	2	2	2	0	0	0	0	0	0	2		0	0	2	0	1900-01-02	2	2	1	2014-07-01	525	3	2010-06-10
285	0	2005-02-17	2012-11-27	14	151	43	18.86	3TC+D4T30+EFV600	1	1	0	0	2		1	2	2	1	2	2	0	1027	0	67.26	83.78	3	2	2	2	0	0	0	0	0	0	2		0	0	2	0	1900-01-02	2	2	1	2014-07-01	581	3	2005-02-16
2851	1	2010-06-15	2013-11-20	46	161	58	22.38	3TC+D4T30+NVP	1	1	0	0	2		1	2	2	1	2	2	0	229	0	111.51	60.14	2	9	9	2	0	0	0	0	0	0	2		0	0	2	0	1900-01-02	2	2	1	2014-07-01	223	3	2010-06-15
2856	1	2010-06-16	2013-12-23	49	163	47	17.69	3TC+D4T30+NVP	1	1	0	0	2		1	2	2	1	2	2	0	395	0	76.99	68.33	3	9	9	2	0	0	0	0	0	0	2		0	0	2	0	1900-01-02	2	2	1	2014-07-01	190	3	2010-06-16
2858	0	2010-06-17	2013-12-17	35	159	62	24.52	3TC+D4T30+NVP	1	1	0	0	2		1	2	2	1	2	2	0	7030	0	66.37	102.01	2	2	2	2	0	0	0	0	0	0	2		0	0	2	0	1900-01-02	2	2	1	2014-07-01	196	3	2010-07-01
286	1	2005-02-17	2012-07-25	36	163	62	23.34	3TC+D4T30+EFV600	1	1	0	0	2		1	2	2	1	2	2	0	634	9999999	67.26	117.92	4	2	2	2	0	0	0	0	0	0	2		0	0	2	0	1900-01-02	2	2	1	2014-07-01	706	3	2005-02-17
2860	0	2010-06-18	2013-10-23	38	149	45	20.27	3TC+D4T30+EFV600	1	1	0	0	2		1	2	2	1	2	2	0	671	0	79.65	59.93	4	2	2	2	0	0	0	0	0	0	2		0	0	2	0	1900-01-02	2	2	1	2014-07-01	251	3	2010-06-18
2861	0	2010-06-21	2013-02-19	40	154	42	17.71	3TC+D4T30+NVP	1	1	0	0	2		1	2	2	1	2	2	0	791	0	63.72	68.55	4	2	2	2	0	0	0	0	0	0	2		0	0	2	0	1900-01-02	2	2	6	2014-07-01	497	3	2010-06-21
2863	1	2010-06-21	2013-11-20	37	167	65	23.31	3TC+D4T30+NVP	1	1	0	0	2		1	2	2	1	2	2	0	814	0	97.35	84.59	2	9	9	2	0	0	0	0	0	0	2		0	0	2	0	1900-01-02	2	2	1	2014-07-01	223	3	2010-06-21
2872	1	2010-07-12	2013-12-31	26	157	56	22.72	3TC+D4T30+EFV600	1	1	0	0	2		1	2	2	1	2	2	0	630	0	53.1	147.88	3	9	9	2	0	0	0	0	0	0	2		0	0	2	0	1900-01-02	2	2	1	2014-07-01	182	3	2010-07-08
2873	1	2010-07-09	2012-12-10	62	155	48	19.98	3TC+D4T30+NVP	1	1	1	0	2		1	2	2	1	2	2	0	178	0	100.89	45.64	3	9	9	1	2	2	1	2	2	2	2		0	1	2	0	1900-01-02	2	2	1	2014-07-01	568	2	2010-06-04
2875	1	2010-07-13	2013-10-08	34	165	52	19.1	3TC+D4T30+NVP	1	1	1	0	2		1	2	2	1	1	2	0	169	176	91.16	74.37	3	9	9	1	2	2	1	2	2	2	2		0	1	2	0	1900-01-02	2	2	1	2014-07-01	266	2	2010-07-13
2879	1	2010-07-20	2013-08-16	45	164	52	19.33	3TC+D4T30+NVP	1	1	0	0	2		1	2	2	1	2	2	0	631	0	80.53	75.45	3	9	9	2	0	0	0	0	0	0	2		0	0	2	0	1900-01-02	2	2	1	2014-07-01	319	3	2010-07-20
2883	0	2010-07-27	2013-08-16	53	147	45	20.82	3TC+D4T30+NVP	1	1	0	0	2		1	2	2	1	2	2	0	593	0	67.26	60.54	4	2	2	2	0	0	0	0	0	0	2		0	0	2	0	1900-01-02	2	2	1	2014-07-01	319	3	2010-07-27
2886	1	2010-07-27	2013-09-19	31	157	47	19.07	3TC+D4T30+NVP	1	1	0	0	2		1	2	2	1	2	2	0	340	0	100	63.01	3	9	9	1	2	2	1	2	2	2	2		0	0	2	0	1900-01-02	2	2	6	2014-07-01	285	3	2010-06-24
2888	0	2010-07-30	2013-03-25	61	147	32	14.81	3TC+AZT+EFV600	1	1	0	0	2		1	2	2	1	2	2	0	467	0	52.21	50.36	4	9	9	2	0	0	0	0	0	0	2		0	0	2	0	1900-01-02	1	2	4	2013-12-13	263	3	2010-07-30
2890	1	2010-08-04	2013-09-25	34	165	52	19.1	3TC+D4T30+EFV600	1	1	0	0	2		1	2	2	1	2	2	0	553	0	84.07	80.64	4	9	9	2	0	0	0	0	0	0	2		0	0	2	0	1900-01-02	2	2	1	2014-07-01	279	3	2010-08-04
2891	0	2010-08-12	2012-06-07	44	150	44	19.56	3TC+D4T30+EFV600	1	1	0	0	2		1	2	2	1	2	2	9	495	9999999	60.18	73	4	9	9	1	2	2	1	2	2	2	2		0	0	2	0	1900-01-02	2	2	6	2014-07-01	754	3	2010-08-12
2893	0	2010-08-13	2013-10-22	58	149	58	26.12	3TC+D4T30+NVP	1	1	0	0	2		1	2	2	1	2	2	0	446	0	69.92	70.74	3	2	2	2	0	0	0	0	0	0	2		0	1	2	0	1900-01-02	2	2	1	2014-07-01	252	3	2010-08-13
2895	0	2010-08-13	2013-09-09	42	150	47	20.89	3TC+D4T30+NVP	1	1	0	0	2		1	2	2	1	2	2	1	722	0	73.45	65.22	3	1	2	2	0	0	0	0	0	0	2		0	0	2	0	1900-01-02	2	2	1	2014-07-01	295	3	2010-08-13
2897	0	2010-08-16	2013-11-22	43	152	56	24.24	3TC+D4T30+NVP	1	1	0	0	2		1	2	2	1	2	2	0	526	0	68.14	82.91	3	2	9	1	2	2	2	2	2	1	2		0	0	2	0	1900-01-02	2	2	1	2014-07-01	221	3	2010-08-16
29	1	2004-11-23	2012-11-16	32	175	70	22.86	3TC+D4T30+EFV600	1	1	0	0	2		1	2	2	1	2	2	9	1113	0	117.7	79	3	2	9	2	0	0	0	0	0	0	2		0	0	2	0	1900-01-02	2	2	1	2014-07-01	592	3	2004-11-23
2900	1	2010-08-16	2013-12-30	28	167	69	24.74	3TC+EFV600+TDF	0	2	0	0	2		1	2	2	1	2	2	0	300	9999999	121.14	78.47	1	2	2	2	0	0	0	0	0	0	2		0	0	2	0	1900-01-02	2	2	1	2014-07-01	183	3	2010-08-16
2901	1	2010-08-16	2013-06-18	40	171	67	22.91	3TC+D4T30+NVP	1	1	0	0	2		1	2	2	1	2	2	0	432	0	93.81	87.85	3	9	9	2	0	0	0	0	0	0	2		0	0	2	0	1900-01-02	2	2	1	2014-07-01	378	3	2010-08-16
2904	1	2010-08-16	2012-03-05	22	162	47	17.91	3TC+AZT+NVP	1	2	0	0	2		1	2	2	1	2	2	0	301	9999999	135.4	50.38	1	9	9	1	2	2	1	2	2	2	2		0	0	2	0	1900-01-02	2	2	1	2014-07-01	848	3	2010-08-17
2905	1	2010-08-17	2013-03-29	42	159	51	20.17	3TC+D4T30+EFV600	1	1	0	0	2		1	2	2	1	2	2	0	202	0	88.5	69.46	3	9	9	1	2	2	1	2	2	2	2		0	0	2	0	1900-01-02	2	2	1	2014-07-01	459	3	2010-07-20
2908	0	2010-08-17	2012-10-19	43	148	45	20.54	3TC+D4T30+EFV600	1	1	0	0	2		1	2	2	1	2	2	9	327	0	53.98	84.1	4	9	9	1	2	2	1	2	2	2	2		0	0	2	0	1900-01-02	2	2	1	2014-07-01	620	3	2010-08-17
2912	0	2010-08-23	2013-09-17	38	153	57	24.35	3TC+D4T30+EFV600	1	1	0	0	2		1	2	2	1	2	2	0	472	0	92.92	65.07	4	2	2	2	0	0	0	0	0	0	2		0	0	2	0	1900-01-02	2	2	1	2014-07-01	287	3	2010-08-09
2916	0	2010-08-30	2013-11-21	39	149	57	25.67	3TC+D4T30+NVP	1	1	0	0	2		1	2	2	1	2	2	1	928	0	73.45	81.52	3	1	9	2	0	0	0	0	0	0	2		0	0	2	0	1900-01-02	2	2	1	2014-07-01	222	3	2010-08-30
2917	0	2010-08-30	2013-12-16	37	153	52	22.21	3TC+D4T30+EFV600	1	1	0	0	2		1	2	2	1	2	2	0	766	0	60.2	92.53	4	9	9	2	0	0	0	0	0	0	2		0	0	2	0	1900-01-02	2	1	3	2014-02-07	53	3	2010-08-30
2918	0	2010-08-31	2013-07-30	30	156	50	20.55	3TC+D4T30+EFV600	1	1	0	0	1		1	2	2	1	2	2	0	566	0	50.45	113.38	3	2	2	2	0	0	0	0	0	0	2		0	0	2	0	1900-01-02	2	2	1	2014-07-01	336	3	2010-08-31
2920	1	2010-09-01	2013-01-07	33	159	54	21.36	3TC+D4T30+NVP	1	1	0	0	2		1	2	2	1	2	2	0	204	0	92.64	76.72	3	9	9	1	2	2	1	2	2	2	2		0	0	2	0	1900-01-02	2	2	1	2014-07-01	540	3	2010-09-01
2924	1	2010-09-06	2012-07-02	30	153	44	18.8	EFV600+FTC+TDF	0	2	0	0	2		1	2	2	1	2	2	1	319	9999999	98.2	60.62	1	1	2	2	0	0	0	0	0	0	2		0	0	2	0	1900-01-02	2	2	6	2014-07-01	729	3	2010-09-06
2926	0	2010-09-07	2013-09-25	45	142	56	27.77	3TC+D4T30+EFV600	1	1	1	0	2		1	2	2	1	2	2	0	368	0	64.61	85.63	3	2	1	1	2	2	1	2	2	2	2		0	1	2	0	1900-01-02	2	2	1	2014-07-01	279	3	2010-09-24
2930	0	2010-09-10	2013-02-19	29	146	47	22.05	3TC+D4T30+NVP	1	1	0	0	2		1	2	2	1	2	2	0	273	0	55.75	97.32	3	2	2	1	2	2	1	2	2	2	2		0	0	2	0	1900-01-02	2	2	1	2014-07-01	497	3	2010-09-10
2936	0	2010-09-20	2013-11-20	38	147	61	28.23	3TC+D4T30+NVP	1	1	1	0	2		1	2	2	1	2	2	0	649	0	68.14	94.96	2	2	2	2	0	0	0	0	0	0	2		0	0	2	0	1900-01-02	2	2	1	2014-07-01	223	3	2010-09-20
2938	0	2010-09-22	2013-08-05	30	159	72	28.48	3TC+D4T30+NVP	1	1	0	0	2		1	2	2	1	2	2	0	680	0	72.57	113.5	3	2	2	2	0	0	0	0	0	0	2		0	0	2	0	1900-01-02	2	2	1	2014-07-01	330	3	2010-09-16
2943	0	2010-09-27	2013-12-17	31	146	45	21.11	3TC+D4T30+EFV600	1	1	0	0	2		1	2	2	1	2	2	0	363	0	52.22	97.69	4	2	2	2	0	0	0	0	0	0	2		0	0	2	0	1900-01-02	2	2	1	2014-07-01	196	3	2010-09-13
2946	1	2010-09-27	2013-08-12	35	173	55	18.38	3TC+EFV600+TDF	0	2	0	0	2		1	2	2	1	2	2	0	729	9999999	95.6	74.3	3	2	9	1	2	2	1	2	2	2	2		0	0	2	0	1900-01-02	2	2	2	2013-12-12	122	3	2010-09-27
2950	1	2010-09-28	2012-12-07	33	160	46	17.97	EFV600+FTC+TDF	0	2	0	0	2		1	2	2	1	2	2	0	14	9999999	88.5	68.41	3	2	9	1	2	2	1	2	2	2	2		0	0	1	2	2013-11-04	2	1	5	2013-11-04	332	1	2010-09-28
2954	0	2010-09-29	2013-05-30	27	154	39	16.44	3TC+EFV600+TDF	0	2	0	0	2		2	0	0	0	0	0	0	432	9999999	52.22	87.77	1	9	9	2	0	0	0	0	0	0	2		0	0	2	0	1900-01-02	2	2	6	2014-05-06	341	3	2010-09-29
2972	1	2010-10-11	2013-11-21	49	146	48	22.52	3TC+D4T30+NVP	1	1	0	0	2		1	2	2	1	2	2	9	204	0	90.27	59.52	3	2	9	1	2	2	1	2	2	2	2		0	0	2	0	1900-01-02	2	2	1	2014-07-01	222	3	2010-10-12
2975	0	2010-10-14	2013-06-20	37	158	41	16.42	3TC+AZT+NVP	1	1	0	0	2		1	2	2	1	2	2	0	612	0	71.68	61.27	4	2	2	2	0	0	0	0	0	0	2		0	0	2	0	1900-01-02	2	2	1	2014-07-01	376	3	2010-10-14
2976	1	2010-10-18	2013-02-19	22	161	52	20.06	3TC+D4T30+EFV600	1	1	0	0	2		1	2	2	1	2	2	0	680	0	84.07	89.77	4	9	9	2	0	0	0	0	0	0	2		0	0	2	0	1900-01-02	2	2	1	2014-07-01	497	3	2010-10-13
2986	0	2010-10-29	2012-08-21	40	157	55	22.31	3TC+D4T30+NVP	1	1	0	0	2		2	0	0	0	0	0	0	663	0	70.8	80.79	4	2	1	2	0	0	0	0	0	0	2		1	0	2	0	1900-01-02	2	2	1	2014-07-01	679	3	2010-07-02
2987	1	2010-11-01	2013-11-25	42	165	60	22.04	3TC+D4T30+EFV600	1	1	0	0	2		1	2	2	1	2	2	0	208	0	93.81	77.1	4	9	9	1	2	2	1	2	2	2	2		0	0	2	0	1900-01-02	2	2	1	2014-07-01	218	3	2010-11-01
302	0	2005-02-22	2012-11-22	41	154	52	21.93	3TC+D4T30+NVP	1	1	0	0	2		1	2	2	1	1	2	9	1056	0	92.04	58.17	3	9	9	2	0	0	0	0	0	0	2		0	0	2	0	1900-01-02	2	2	1	2014-07-01	586	3	2005-03-21
3025	1	2010-12-02	2013-12-18	38	157	51	20.69	3TC+AZT+NVP	1	1	0	0	2		1	2	2	1	2	2	9	711	0	58.4	109.56	3	9	9	2	0	0	0	0	0	0	2		0	0	2	0	1900-01-02	2	2	1	2014-07-01	195	3	2010-12-02
3029	0	2010-12-06	2013-11-08	26	158	47	18.83	3TC+AZT+EFV600	1	1	0	0	2		1	2	2	1	1	2	9	507	0	53.1	104.94	4	9	9	2	0	0	0	0	0	0	2		0	0	2	0	1900-01-02	2	2	1	2014-07-01	235	3	2010-12-06
3046	1	2010-12-16	2013-01-24	41	164	52	19.33	3TC+AZT+EFV600	1	1	0	0	2		1	2	2	1	2	2	0	361	0	76.11	83.2	4	9	9	1	2	2	1	2	2	2	2		0	0	2	0	1900-01-02	2	2	1	2014-07-01	523	3	2010-12-17
3052	1	2010-12-23	2012-11-21	39	161	53	20.45	3TC+AZT+NVP	1	1	0	0	2		1	2	2	1	2	2	0	193	0	110.25	59.72	4	9	9	1	2	2	1	2	2	2	2		0	0	2	0	1900-01-02	2	2	1	2014-07-01	587	2	2010-12-23
3066	0	2011-01-18	2012-01-10	53	153	55	23.5	3TC+AZT+NVP	1	2	0	0	2		1	2	2	1	2	2	0	171	9999999	78.77	63.18	3	2	9	1	2	2	1	2	2	2	2		0	0	2	0	1900-01-02	2	2	1	2014-07-01	903	2	2010-12-23
3067	0	2011-01-12	2013-05-03	37	155	49	20.4	3TC+AZT+NVP	1	1	0	0	2		1	2	2	1	2	2	0	269	0	61.06	85.96	4	2	1	1	2	2	1	2	2	2	2		0	0	2	0	1900-01-02	2	2	1	2014-07-01	424	3	2011-01-12
3085	1	2011-01-27	2012-06-04	40	160	52	20.31	3TC+AZT+NVP	1	2	0	0	2		1	2	2	1	2	2	9	410	9999999	86.73	73.75	3	2	9	1	2	2	1	2	2	2	2		0	0	2	0	1900-01-02	2	2	1	2014-07-01	757	3	2011-01-27
3088	1	2011-01-28	2012-11-30	51	155	47	19.56	EFV600+FTC+TDF	0	2	0	0	2		1	2	2	1	2	2	0	344	9999999	69.9	73.61	3	2	2	1	2	2	1	2	2	2	2		0	0	2	0	1900-01-02	2	2	1	2014-07-01	578	3	2010-12-28
3104	1	2011-02-07	2013-07-26	36	154	55	23.19	3TC+D4T30+EFV600	1	1	0	0	2		1	2	2	1	2	2	0	299	0	115.05	61.15	4	9	9	1	2	2	1	2	2	2	2		0	0	2	0	1900-01-02	2	2	1	2014-07-01	340	3	2011-02-07
3106	0	2011-02-07	2012-07-04	26	148	41	18.72	3TC+AZT+NVP	1	1	0	0	2		1	2	2	1	2	2	9	419	9999999	53.1	91.54	2	9	9	2	0	0	0	0	0	0	2		0	0	2	0	1900-01-02	2	2	1	2014-07-01	727	3	2011-02-01
3116	0	2011-02-18	2012-05-21	29	153	53	22.64	3TC+AZT+NVP	1	1	0	0	2		1	2	2	1	2	2	0	461	9999999	117.7	51.98	4	2	2	1	2	2	1	2	2	2	2		0	0	2	0	1900-01-02	2	2	1	2014-07-01	771	3	2011-02-18
3132	0	2011-03-07	2013-09-19	37	152	60	25.97	3TC+AZT+NVP	1	1	0	0	2		1	2	2	1	2	2	0	539	0	67.26	95.56	3	2	2	2	0	0	0	0	0	0	2		0	0	2	0	1900-01-02	2	2	1	2014-07-01	285	3	2011-03-08
3139	0	2011-03-15	2013-10-01	23	157	58	23.53	3TC+EFV600+TDF	0	2	0	0	2		1	2	2	1	2	2	0	387	9999999	68.14	103.57	3	2	9	2	0	0	0	0	0	0	2		0	0	2	0	1900-01-02	2	2	1	2014-07-01	273	3	2011-03-15
314	0	2005-03-02	2013-09-05	15	147	36	16.66	3TC+D4T30+NVP	1	1	0	0	2		1	2	2	1	2	2	9	530	0	55.76	83.93	3	9	2	2	0	0	0	0	0	0	2		0	0	2	0	1900-01-02	2	2	1	2014-07-01	299	3	2005-03-07
3145	0	2011-03-22	2013-12-23	28	156	58	23.83	3TC+AZT+EFV600	1	1	0	0	2		1	2	2	1	2	2	0	496	0	36.28	186.21	4	2	2	2	0	0	0	0	0	0	2		0	0	2	0	1900-01-02	2	2	1	2014-07-01	190	3	2011-03-22
3151	0	2011-03-24	2013-03-06	61	142	40	19.84	3TC+AZT+NVP	1	1	0	0	2		1	2	2	1	1	2	9	123	0	57.52	57.13	4	9	9	2	0	0	0	0	0	0	2		0	0	2	0	1900-01-02	2	2	6	2014-07-01	482	2	2011-03-18
3157	0	2011-03-30	2012-12-06	34	157	49	19.88	3TC+AZT+NVP	1	1	0	0	2		1	2	2	1	2	2	0	505	9999999	79.7	67.78	2	2	2	2	0	0	0	0	0	0	2		0	0	2	0	1900-01-02	2	2	1	2014-07-01	572	3	2011-03-11
3173	1	2011-04-27	2013-08-16	54	172	66	22.31	3TC+EFV600+TDF	0	2	1	0	2		2	0	0	0	0	0	0	377	9999999	116.8	59.77	2	2	2	2	0	0	0	0	0	0	1	Bilateral nephrotrophy	0	1	2	0	1900-01-02	2	2	1	2014-07-01	319	3	2011-04-27
3175	1	2011-04-29	2013-03-27	31	165	58	21.3	3TC+AZT+NVP	1	1	0	0	2		1	2	2	1	2	2	0	483	0	109.74	70.86	3	9	9	1	2	2	1	2	2	2	2		0	0	2	0	1900-01-02	2	2	1	2014-07-01	461	3	2011-04-29
3180	0	2011-05-02	2013-02-19	37	148	48	21.91	3TC+D4T30+EFV600	1	1	0	0	2		1	2	2	1	2	2	0	848	9999999	43.36	118.58	4	2	9	1	2	2	1	2	2	2	2		0	0	2	0	1900-01-02	2	2	1	2014-07-01	497	3	2011-05-02
319	0	2005-03-03	2013-01-22	30	152	51	22.07	3TC+D4T30+NVP	1	1	0	0	2		1	2	2	1	2	2	9	760	0	58.41	99.89	4	2	2	2	0	0	0	0	0	0	2		0	0	2	0	1900-01-02	2	2	1	2014-07-01	525	3	2005-03-03
3199	0	2011-05-19	2013-07-01	29	146	42	19.7	3TC+EFV600+TDF	0	2	0	0	2		1	2	2	1	2	2	0	290	9999999	61.95	78.26	1	2	2	1	2	2	1	2	2	2	2		0	0	2	0	1900-01-02	2	2	1	2014-07-01	365	3	2011-05-19
3204	0	2011-05-24	2013-11-22	39	151	47	20.61	3TC+D4T30+NVP	1	1	0	0	2		1	2	2	1	2	2	0	3666	0	94.69	52.14	3	2	9	1	2	2	1	2	2	2	2		0	0	2	0	1900-01-02	2	2	1	2014-07-01	221	3	2011-03-10
321	1	2005-03-09	2012-08-06	51	162	53	20.2	3TC+D4T30+NVP	1	1	0	0	2		1	2	2	1	2	2	9	101	0	104.43	55.56	4	2	9	1	2	2	1	2	2	2	2		0	0	2	0	1900-01-02	2	2	1	2014-07-01	694	2	2005-03-09
3211	0	2011-05-26	2012-08-23	25	144	47	22.67	3TC+AZT+NVP	1	1	0	0	2		1	2	2	1	2	2	0	385	9999999	90.27	62.27	3	2	2	1	2	2	1	2	2	2	2		0	0	2	0	1900-01-02	2	2	1	2014-07-01	677	3	2011-05-26
3216	0	2011-05-31	2013-12-02	31	145	43	20.45	3TC+EFV600+TDF	0	2	0	0	2		2	0	0	0	0	0	1	435	9999999	77	63.3	2	1	2	2	0	0	0	0	0	0	2		0	0	2	0	1900-01-02	2	2	1	2014-07-01	211	3	2011-05-31
3218	1	2011-06-02	2013-04-22	35	162	56	21.34	3TC+EFV600+TDF	0	2	0	0	2		1	2	2	1	2	2	0	379	9999999	101.8	71.05	3	2	2	2	0	0	0	0	0	0	2		0	0	2	0	1900-01-02	2	2	1	2014-07-01	435	3	2011-06-02
3233	1	2011-06-09	2013-09-19	36	157	52	21.1	3TC+AZT+NVP	1	1	0	0	2		1	2	2	1	1	2	0	276	0	80.53	82.6	4	9	9	1	2	2	1	2	2	2	2		0	0	2	0	1900-01-02	2	2	1	2014-07-01	285	3	2011-06-09
3245	1	2011-06-13	2013-06-17	37	169	55	19.26	3TC+AZT+EFV600	1	2	0	0	2		1	2	2	1	2	2	0	275	9999999	117.7	59.2	3	9	9	2	0	0	0	0	0	0	2		0	0	2	0	1900-01-02	2	2	1	2014-07-01	379	3	2011-06-13
3249	1	2011-06-16	2013-11-21	42	165	78	28.65	3TC+AZT+NVP	1	1	0	0	2		1	2	2	1	1	2	0	720	0	211.11	79.88	4	2	9	2	0	0	0	0	0	0	2		0	0	2	0	1900-01-02	2	2	1	2014-07-01	222	3	2011-06-15
3253	1	2011-06-20	2012-05-09	43	162	60	22.86	3TC+AZT+NVP	1	1	0	0	2		1	2	2	1	1	2	0	215	9999999	112.39	63.69	3	2	9	1	2	2	1	2	2	2	2		0	0	2	0	1900-01-02	2	2	1	2014-07-01	783	3	2011-06-13
3254	0	2011-06-20	2012-10-29	45	147	57	26.38	3TC+AZT+NVP	1	1	0	0	2		1	2	2	1	1	2	0	999	9999999	77.88	72.31	4	2	2	1	2	2	1	2	2	2	2		0	0	2	0	1900-01-02	2	2	6	2014-07-01	610	3	2011-06-06
3255	1	2011-06-20	2012-07-09	35	162	56	21.34	EFV600+FTC+TDF	0	2	0	0	2		1	2	2	1	2	2	1	478	9999999	104.4	69.28	3	1	2	2	0	0	0	0	0	0	2		0	0	2	0	1900-01-02	2	2	1	2014-07-01	722	3	2011-06-20
3272	0	2011-06-29	2013-06-11	37	147	61	28.23	3TC+EFV600+TDF	0	2	0	0	2		1	2	2	1	2	2	0	315	9999999	91.16	71.68	2	2	2	2	0	0	0	0	0	0	2		0	0	2	0	1900-01-02	2	2	1	2014-07-01	385	3	2011-06-29
328	1	2005-03-02	2013-03-11	35	170	50	17.3	3TC+AZT+EFV600	1	1	0	0	2		1	2	2	1	2	2	0	394	9999999	90.27	71.54	3	9	9	1	2	2	1	2	2	2	2		0	0	2	0	1900-01-02	2	2	1	2014-07-01	477	3	2005-03-22
3281	0	2011-07-08	2013-11-04	42	149	53	23.87	3TC+D4T+NVP	1	1	1	0	2		1	2	2	1	2	2	0	435	9999999	75.2	71.83	3	2	2	2	0	0	0	0	0	0	2		0	0	2	0	1900-01-02	2	2	1	2014-07-01	239	3	2011-06-27
3289	0	2011-07-11	2012-09-25	32	149	52	23.42	3TC+D4T30+NVP	1	1	0	0	2		1	2	2	1	2	2	0	897	0	67.26	86.84	3	2	9	2	0	0	0	0	0	0	2		0	0	2	0	1900-01-02	2	2	1	2014-07-01	644	3	2011-06-27
3302	1	2011-07-25	2013-11-12	47	162	55	20.96	3TC+D4T30+NVP	1	1	0	0	2		1	2	2	1	2	2	0	367	0	66.37	94.79	3	9	9	2	0	0	0	0	0	0	2		0	0	2	0	1900-01-02	2	2	1	2014-07-01	231	3	2011-07-18
3307	1	2011-07-25	2012-02-09	44	164	58	21.56	3TC+AZT+EFV600	1	2	0	0	2		1	2	2	1	1	2	0	14	9999999	133.63	51.25	4	9	9	1	2	2	1	1	2	2	2		0	0	2	0	1900-01-02	2	2	1	2014-07-01	873	1	2011-07-25
3309	1	2011-07-26	2012-08-28	38	166	51	18.51	EFV600+FTC+TDF	0	2	9	9	2		1	2	2	1	2	2	1	291	9999999	97.35	65.73	2	1	2	2	0	0	0	0	0	0	2		0	0	2	0	1900-01-02	2	2	1	2014-07-01	672	3	2011-07-26
3314	1	2011-07-29	2012-08-09	43	171	63	21.55	3TC+AZT+EFV600	1	2	0	0	2		1	2	2	1	2	2	0	295	0	111.51	67.41	4	9	9	2	0	0	0	0	0	0	2		0	0	2	0	1900-01-02	2	2	1	2014-07-01	691	3	2011-07-29
3315	0	2011-08-03	2013-07-10	46	158	51	20.43	3TC+AZT+EFV600	1	1	0	0	2		1	2	2	1	2	2	0	129	0	99.48	50.12	4	2	9	1	2	2	1	2	2	2	2		0	0	2	0	1900-01-02	2	2	1	2014-07-01	356	2	2011-08-03
3351	0	2011-08-26	2012-04-06	33	147	38	17.59	3TC+AZT+NVP	1	2	0	0	2		1	2	2	1	2	2	0	244	9999999	82.3	51.38	3	2	2	1	2	2	1	2	2	2	2		0	0	2	0	1900-01-02	2	2	1	2014-07-01	816	3	2011-08-19
3357	0	2011-08-29	2012-12-18	41	150	53	23.56	3TC+AZT+NVP	1	1	1	0	2		1	2	2	1	2	2	0	482	0	70.8	77.07	2	2	2	2	0	0	0	0	0	0	2		0	0	2	0	1900-01-02	2	2	1	2014-07-01	560	3	2011-08-29
3358	0	2011-08-15	2013-10-10	43	152	48.5	20.99	3TC+D4T+NVP	1	1	0	0	2		1	2	2	1	2	2	9	209	0	64.6	75.74	2	9	9	1	2	2	1	2	2	2	2		0	0	2	0	1900-01-02	2	1	3	2014-03-18	159	3	2011-08-15
3365	0	2011-09-02	2013-01-07	43	155	67	27.89	3TC+AZT+NVP	1	2	0	0	2		1	2	2	1	2	2	0	160	9999999	64.61	104.61	4	2	9	1	2	2	1	2	2	2	2		0	0	2	0	1900-01-02	2	2	1	2014-07-01	540	2	2011-08-22
338	1	2005-03-16	2012-09-20	35	167	64	22.95	3TC+D4T30+NVP	1	1	0	0	2		1	2	2	1	2	2	9	563	0	127.44	64.86	3	2	2	2	0	0	0	0	0	0	2		0	0	2	0	1900-01-02	2	2	1	2014-07-01	649	3	2005-03-16
3380	1	2011-09-21	2013-07-11	34	174	70	23.12	3TC+EFV600+TDF	0	2	0	0	2		1	2	2	1	2	2	0	213	9999999	83.2	109.69	3	2	2	2	0	0	0	0	0	0	2		0	0	2	0	1900-01-02	2	2	1	2014-07-01	355	3	2011-09-21
3385	0	2011-09-26	2013-07-01	20	140	44	22.45	3TC+EFV600+TDF	1	2	0	0	2		2	0	0	0	0	0	0	742	9999999	60.18	91.25	1	2	9	2	0	0	0	0	0	0	2		0	0	2	0	1900-01-02	2	2	1	2014-07-01	365	3	2011-09-22
3394	0	2011-10-05	2013-06-10	33	156	48	19.72	3TC+AZT+NVP	1	2	0	0	2		1	2	2	1	2	2	0	205	9999999	95.58	55.88	3	2	2	2	0	0	0	0	0	0	2		0	0	2	0	1900-01-02	2	2	1	2014-07-01	386	3	2011-10-05
3405	1	2011-10-17	2012-09-18	36	162	50	19.05	3TC+AZT+NVP	1	1	0	0	2		1	2	2	1	1	2	0	71	0	115.93	55.17	4	9	9	1	2	2	1	2	2	2	2		0	0	2	0	1900-01-02	2	2	1	2014-07-01	651	1	2011-10-03
3408	1	2011-10-18	2012-10-19	64	165	47	17.26	EFV600+FTC+TDF	0	2	0	0	2		1	2	2	1	2	2	0	134	9999999	69	63.67	3	2	9	2	0	0	0	0	0	0	2		0	0	2	0	1900-01-02	2	2	1	2014-07-01	620	2	2011-10-10
344	0	2005-03-11	2012-07-27	41	143	41	20.05	EFV600+FTC+TDF	0	2	0	0	2		1	2	2	1	2	2	0	91	9999999	71	59.46	4	2	2	2	0	0	0	0	0	0	2		0	0	2	0	1900-01-02	2	2	1	2014-07-01	704	1	2005-04-05
3447	1	2011-11-24	2013-03-08	37	159	48	18.99	3TC+AZT+NVP	1	2	0	0	2		1	2	2	1	2	2	0	497	0	67.37	90.26	3	9	9	2	0	0	0	0	0	0	2		0	0	2	0	1900-01-02	2	2	1	2014-07-01	480	3	2011-11-24
345	1	2005-03-01	2013-12-24	35	160	47	18.36	3TC+D4T30+NVP	1	1	1	0	2		1	2	2	1	2	2	0	497	0	77.88	77.94	3	9	9	2	0	0	0	0	0	0	2		0	0	2	0	1900-01-02	2	2	1	2014-07-01	189	3	2005-03-01
3450	1	2011-11-25	2013-05-16	29	165	55	20.2	3TC+AZT+NVP	1	2	0	0	2		1	2	2	1	2	2	0	408	9999999	103.54	72.52	1	2	2	2	0	0	0	0	0	0	2		0	0	2	0	1900-01-02	2	2	1	2014-07-01	411	3	2011-11-21
3461	0	2011-12-07	2012-11-16	40	155	55	22.89	EFV600+FTC+TDF	0	2	0	0	2		1	2	2	1	2	2	0	302	9999999	46	124.35	3	2	9	1	2	2	1	2	2	2	2		0	0	2	0	1900-01-02	2	2	2	2013-07-29	255	3	2011-12-07
3466	0	2011-12-12	2012-01-24	47	153	38	16.23	3TC+AZT+EFV600	1	2	0	0	2		1	2	2	1	2	2	0	9999	9999999	68.15	53.93	4	2	1	1	2	2	1	2	2	2	2		0	0	2	0	1900-01-02	2	2	1	2014-07-01	889	3	2011-12-12
3475	1	2011-12-19	2012-01-12	32	161	44	16.97	EFV600+FTC+TDF	0	2	0	0	2		1	2	2	1	2	2	0	69	9999999	76	76.91	4	2	9	1	2	2	1	2	2	2	2		0	0	2	0	1900-01-02	2	1	2	2013-10-23	650	1	2011-12-19
3477	0	2011-12-21	2012-01-16	36	149	42	18.92	EFV600+FTC+TDF	0	2	0	0	2		1	2	2	1	2	2	0	62	9999999	84	54.08	4	2	2	2	0	0	0	0	0	0	2		0	0	2	0	1900-01-02	2	2	1	2014-07-01	897	1	2011-12-21
3480	0	2011-12-27	2012-01-12	40	160	56	21.88	EFV600+FTC+TDF	0	2	0	0	2		1	2	2	1	2	2	0	4	9999999	75	77.65	4	2	9	1	2	2	1	2	2	2	2		0	0	1	2	2013-05-22	2	2	5	2013-05-22	496	1	2011-11-30
3485	0	2012-01-02	2012-07-31	34	155	49	20.4	EFV600+FTC+TDF	0	2	0	0	2		1	2	2	1	2	2	0	24	9999999	63.7	84.8	3	2	9	2	0	0	0	0	0	0	2		0	0	2	1	2013-02-14	2	1	2	2013-11-19	476	1	2012-01-02
3486	1	2012-01-05	2012-03-29	41	175	60	19.59	3TC+AZT+EFV600	1	2	0	0	2		1	2	2	1	2	2	0	23	9999999	133.63	54.67	3	9	9	1	2	2	1	2	2	2	2		0	0	2	0	1900-01-02	1	2	4	2012-04-27	29	1	2012-01-05
3488	0	2012-01-09	2012-01-20	34	156	56	23.01	EFV600+FTC+TDF	0	2	0	0	2		1	2	2	1	2	2	1	254	9999999	68	90.79	3	1	2	2	0	0	0	0	0	0	2		0	0	2	0	1900-01-02	2	2	1	2014-07-01	893	3	2012-01-06
3495	0	2012-01-12	2012-01-30	39	148	29	13.24	EFV600+FTC+TDF	0	2	0	0	2		1	2	2	1	1	2	0	39	9999999	51	59.73	4	2	9	1	2	2	1	2	2	2	2		0	0	2	0	1900-01-02	1	1	4	2012-03-20	50	1	2012-01-05
3502	1	2012-01-18	2013-08-12	45	165	60	22.04	3TC+D4T30+NVP	1	1	0	0	2		1	2	2	1	2	2	0	153	9999999	75.22	93.21	3	9	9	1	2	2	1	2	2	2	2		0	0	2	0	1900-01-02	2	2	1	2014-07-01	323	2	2011-12-21
3507	0	2012-01-23	2013-04-03	39	147	57	26.38	3TC+AZT+NVP	1	1	0	0	2		1	2	2	1	1	2	0	408	9999999	91.16	65.68	4	2	2	1	2	2	1	2	2	2	2		0	0	2	0	1900-01-02	2	2	1	2014-07-01	454	3	2012-01-23
3510	0	2012-01-24	2012-08-28	38	158	57	22.83	3TC+D4T30+NVP	1	1	1	0	2		2	0	0	0	0	0	0	1015	0	71.69	84.34	4	2	9	2	0	0	0	0	0	0	2		0	0	2	0	1900-01-02	2	2	1	2014-07-01	672	3	2011-12-21
3517	0	2012-01-26	2012-06-07	42	152	44	19.04	3TC+AZT+NVP	1	2	0	0	2		1	2	2	1	1	2	0	9999	9999999	67.26	66.67	2	2	2	2	0	0	0	0	0	0	2		0	0	2	0	1900-01-02	2	2	1	2014-07-01	754	3	2012-01-26
3520	0	2012-01-27	2012-01-27	37	155	50	20.81	EFV600+FTC+TDF	0	2	0	0	2		1	2	2	1	2	2	0	40	9999999	84.87	63.11	3	2	9	1	2	2	2	1	2	2	2		0	0	2	0	1900-01-02	1	2	4	2013-09-03	585	1	2012-01-02
3528	1	2012-01-31	2012-02-13	32	162	49	18.67	EFV600+FTC+TDF	0	2	0	0	2		1	2	2	1	2	2	1	259	9999999	80	81.36	3	1	9	2	0	0	0	0	0	0	2		0	0	2	0	1900-01-02	2	2	1	2014-07-01	869	3	2012-01-31
353	1	2005-03-21	2012-10-18	49	165	49	18	3TC+D4T30+EFV600	1	1	0	0	2		1	2	2	1	2	2	9	734	0	64.6	84.9	4	2	9	2	0	0	0	0	0	0	2		0	0	2	0	1900-01-02	2	2	1	2014-07-01	621	3	2005-03-18
3543	1	2012-02-14	2012-02-21	33	165	59	21.67	EFV600+FTC+TDF	0	2	0	0	2		1	2	2	1	2	2	1	343	9999999	74	104.93	2	1	9	2	0	0	0	0	0	0	2		0	0	2	0	1900-01-02	2	2	1	2014-07-01	861	3	2012-01-25
3544	1	2012-02-16	2012-04-30	33	158	48	19.23	3TC+AZT+NVP	1	1	0	0	2		1	2	2	1	2	2	0	109	9999999	89.38	70.68	3	9	9	1	2	2	1	2	2	2	2		0	0	2	0	1900-01-02	2	2	1	2014-07-01	792	2	2012-01-25
3547	1	2012-02-17	2012-05-10	34	161	81	31.25	3TC+AZT+NVP	1	2	0	0	2		1	2	2	1	2	2	0	23	9999999	108.85	97.02	4	9	9	1	2	2	1	2	2	2	2		0	0	2	0	1900-01-02	2	2	1	2014-07-01	782	1	2012-02-17
3548	0	2012-02-20	2012-03-14	28	160	43	16.8	EFV600+FTC+TDF	0	2	0	0	2		1	2	2	1	2	2	0	46	9999999	56.6	88.49	3	2	9	2	0	0	0	0	0	0	2		0	0	2	0	1900-01-02	2	2	1	2014-07-01	839	1	2012-02-09
3549	1	2012-02-21	2012-05-07	27	161	46	17.75	3TC+AZT+NVP	1	2	0	0	2		1	2	2	1	2	2	0	56	9999999	78.76	81.18	3	9	9	1	2	2	1	1	2	1	2		0	0	2	0	1900-01-02	2	2	1	2014-07-01	785	1	2012-02-21
3550	0	2012-02-21	2012-10-18	38	156	43	17.67	3TC+D4T30+NVP	1	1	0	0	2		2	0	0	0	0	0	0	627	0	55.76	81.8	3	2	2	2	0	0	0	0	0	0	2		0	0	2	0	1900-01-02	2	2	1	2014-07-01	621	3	2011-12-22
3556	0	2012-02-27	2012-05-25	35	154	45	18.97	3TC+AZT+NVP	1	2	0	0	2		1	2	2	1	2	2	0	9999	9999999	69.91	70.29	2	2	9	1	2	2	1	2	2	2	2		0	0	2	0	1900-01-02	2	2	1	2014-07-01	767	3	2012-02-27
3557	0	2012-02-27	2012-03-13	42	151	42	18.42	EFV600+FTC+TDF	0	2	0	0	2		1	2	2	1	2	2	0	136	9999999	71.68	59.72	3	2	9	2	0	0	0	0	0	0	2		0	0	2	0	1900-01-02	2	2	1	2014-07-01	840	2	2012-02-17
3561	0	2012-02-29	2013-06-04	38	151	81	35.52	3TC+EFV600+TDF	0	2	0	0	2		2	0	0	0	0	0	0	1151	9999999	69.92	122.89	1	2	9	2	0	0	0	0	0	0	2		0	0	2	0	1900-01-02	2	2	1	2014-07-01	392	3	2012-02-22
3564	1	2012-03-05	2012-03-26	37	161	44	16.97	EFV600+FTC+TDF	0	2	0	0	2		1	2	2	1	2	2	0	39	9999999	82.3	67.73	4	2	9	1	2	2	1	2	2	2	2		0	0	2	0	1900-01-02	2	2	1	2014-07-01	827	1	2012-03-01
3576	0	2012-03-14	2012-06-14	30	152	43	18.61	3TC+AZT+EFV600	1	2	0	0	2		2	0	0	0	0	0	0	257	9999999	61.06	80.56	4	2	9	2	0	0	0	0	0	0	2		0	0	2	0	1900-01-02	2	2	1	2014-07-01	747	3	2012-02-22
3587	0	2012-03-20	2012-08-28	38	161	52	20.06	3TC+D4T30+NVP	1	1	0	0	2		1	2	2	1	2	2	0	505	0	83.19	66.31	3	2	2	2	0	0	0	0	0	0	2		0	0	2	0	1900-01-02	2	2	1	2014-07-01	672	3	2011-12-22
359	1	2005-03-23	2012-08-24	46	172	77	26.03	3TC+D4T40+EFV600	1	1	0	0	2		1	2	2	1	2	2	0	731	100	119.5	74.5	4	9	9	1	2	2	1	2	2	2	2		0	0	2	0	1900-01-02	1	2	4	2014-04-23	607	3	2005-03-22
3595	1	2012-03-26	2012-04-27	45	162	48	18.29	EFV600+FTC+TDF	0	2	0	0	2		1	2	2	1	2	2	0	26	9999999	100.89	55.59	4	2	9	1	2	2	1	2	2	2	2		0	0	2	0	1900-01-02	2	2	1	2014-07-01	795	1	2012-03-19
3596	1	2012-03-27	2012-05-17	38	165	54	19.83	3TC+AZT+EFV600	1	2	0	0	2		2	0	0	0	0	0	0	152	9999999	72	94.09	4	9	9	2	0	0	0	0	0	0	2		1	0	2	0	1900-01-02	2	2	1	2014-07-01	775	2	2012-03-16
3597	0	2012-03-27	2012-06-11	46	155	43	17.9	3TC+AZT+EFV600	1	2	1	0	2		1	2	2	1	1	2	0	9999	9999999	69.92	60.12	3	2	9	1	2	2	1	2	2	2	2		0	0	2	0	1900-01-02	2	2	1	2014-07-01	750	3	2012-03-06
3602	0	2012-04-04	2013-10-11	37	150	43	19.11	3TC+EFV600+TDF	0	2	0	0	2		1	2	2	1	2	2	1	273	9999999	54.87	83.95	2	1	9	1	2	2	1	2	2	2	2		0	0	2	0	1900-01-02	2	2	1	2014-07-01	263	3	2012-03-29
3603	1	2012-04-05	2012-05-07	41	163	53	19.95	EFV600+FTC+TDF	0	2	0	0	2		1	2	2	1	2	2	1	83	9999999	89	72.51	3	1	1	2	0	0	0	0	0	0	2		0	0	2	0	1900-01-02	2	2	1	2014-07-01	785	1	2012-04-02
3604	1	2012-04-06	2012-06-01	43	152	48	20.78	3TC+AZT+NVP	1	2	0	0	2		1	2	2	1	2	2	0	55	9999999	80.87	70.82	4	9	1	1	2	2	1	1	2	2	2		0	0	2	0	1900-01-02	2	2	1	2014-07-01	760	1	2012-03-23
3610	1	2012-04-09	2012-05-07	42	166	40	14.52	EFV600+FTC+TDF	0	2	0	0	2		1	2	2	1	2	2	0	14	9999999	60.2	80.09	4	2	9	1	2	2	1	2	2	2	2		0	1	2	0	1900-01-02	1	2	4	2012-11-19	196	1	2012-04-02
3611	1	2012-04-09	2012-05-02	34	155	54	22.48	EFV600+FTC+TDF	0	2	0	0	2		1	2	2	1	1	2	1	121	9999999	119.5	58.92	3	1	9	1	2	2	1	2	2	2	2		0	0	2	0	1900-01-02	2	2	1	2014-07-01	790	2	2012-03-29
3617	1	2012-04-19	2012-05-07	41	182	58	17.51	EFV600+FTC+TDF	0	2	0	0	2		1	2	2	1	1	2	1	144	9999999	54.9	128.65	3	1	9	2	0	0	0	0	0	0	2		0	0	2	0	1900-01-02	2	2	1	2014-07-01	785	2	2012-04-19
3620	0	2012-04-24	2013-07-17	45	154	45	18.97	3TC+EFV600+TDF	0	2	0	0	2		2	0	0	0	0	0	0	328	9999999	61.95	71.77	2	2	2	2	0	0	0	0	0	0	2		0	0	2	0	1900-01-02	2	2	1	2014-07-01	349	3	2012-04-24
3622	1	2012-04-24	2013-07-29	35	165	52	19.1	3TC+D4T30+NVP	1	1	0	0	2		1	2	2	2	1	2	0	254	0	78.76	85.27	3	9	9	1	2	2	1	2	2	2	2		0	0	2	0	1900-01-02	2	2	1	2014-07-01	337	3	2012-01-30
3627	0	2012-04-26	2012-05-18	42	154	46	19.4	EFV600+FTC+TDF	0	2	0	0	2		1	2	2	1	2	2	1	13	9999999	71.7	65.39	4	1	1	1	2	2	1	2	2	2	2		0	0	2	0	1900-01-02	2	2	1	2014-07-01	774	1	2012-04-19
3632	1	2012-04-30	2012-07-31	30	167	62	22.23	3TC+AZT+NVP	1	2	0	0	2		1	2	2	1	2	2	0	163	9999999	90.27	92.93	3	9	9	1	2	2	1	2	2	2	2		0	0	2	0	1900-01-02	2	2	1	2014-07-01	700	2	2012-03-29
3633	0	2012-04-30	2012-05-03	29	148	40	18.26	EFV600+FTC+TDF	0	2	0	0	2		1	2	2	1	2	2	0	22	9999999	86.73	53.24	4	2	9	2	0	0	0	0	0	0	2		0	0	2	0	1900-01-02	2	2	1	2014-07-01	789	1	2012-03-29
3634	1	2012-04-30	2012-05-14	23	171	53	18.13	EFV600+FTC+TDF	0	2	0	0	2		1	2	2	1	2	2	0	33	9999999	74	103.07	3	2	9	1	2	2	1	2	2	2	2		0	0	2	0	1900-01-02	1	2	4	2012-07-26	73	1	2012-04-19
3635	0	2012-04-30	2012-06-11	32	160	44	17.19	3TC+AZT+EFV600	1	2	0	0	2		1	2	2	1	2	2	1	9999	9999999	76.99	64.19	4	1	9	1	2	2	1	2	1	2	2		0	0	2	0	1900-01-02	2	2	1	2014-07-01	750	3	2012-03-08
3637	1	2012-05-03	2012-06-14	52	168	45	15.94	EFV600+FTC+TDF	0	2	0	0	2		1	2	2	1	2	2	0	20	9999999	76.1	64.01	4	2	9	1	2	2	1	2	2	2	2		0	0	2	0	1900-01-02	1	2	4	2012-10-31	139	1	2012-05-03
364	0	2005-03-28	2013-10-24	40	153	50	21.36	3TC+D4T30+NVP	1	1	0	0	2		1	2	2	1	2	2	0	434	0	62.83	82.76	3	2	2	2	0	0	0	0	0	0	2		0	0	2	0	1900-01-02	2	2	1	2014-07-01	250	3	2005-03-25
3640	0	2012-05-03	2013-10-28	39	162	58	22.1	3TC+EFV600+TDF	0	2	0	0	2		1	2	2	1	2	2	1	347	9999999	55.76	109.26	2	1	9	2	0	0	0	0	0	0	2		0	0	2	0	1900-01-02	2	2	1	2014-07-01	246	3	2012-04-25
3644	1	2012-05-09	2012-05-30	54	170	58	20.07	3TC+AZT+NVP	1	2	0	0	2		1	2	2	1	2	2	0	27	9999999	109.74	55.91	3	9	9	1	2	2	1	2	2	2	2		0	0	2	0	1900-01-02	2	2	1	2014-07-01	762	1	2012-04-23
3645	1	2012-05-10	2012-05-24	32	158	59	23.63	EFV600+FTC+TDF	0	2	0	0	2		1	2	2	1	2	2	1	36	9999999	107.08	73.19	4	1	9	1	2	2	1	2	2	2	2		0	0	2	0	1900-01-02	2	2	1	2014-07-01	768	1	2012-04-02
3646	1	2012-05-11	2012-06-05	31	163	37	13.93	EFV600+FTC+TDF	0	2	0	0	2		1	2	2	1	2	2	0	14	9999999	56.6	87.64	4	2	9	2	0	0	0	0	0	0	2		0	0	2	0	1900-01-02	2	2	1	2014-07-01	756	1	2012-05-10
3647	1	2012-05-14	2012-07-16	27	155	40	16.65	3TC+AZT+EFV600	1	2	0	0	2		1	2	2	1	2	2	0	46	9999999	60.2	92.35	4	9	9	1	2	2	1	2	2	2	2		0	0	2	0	1900-01-02	1	2	4	2012-08-13	28	1	2012-05-14
3653	0	2012-05-17	2012-08-09	24	159	55	21.76	3TC+AZT+NVP	1	2	0	0	9		1	2	2	1	2	2	0	9999	9999999	78.76	84.25	1	2	9	1	2	2	1	2	2	2	2		0	0	2	0	1900-01-02	2	2	1	2014-07-01	691	3	2012-05-10
3656	1	2012-05-22	2012-08-16	45	165	50	18.37	3TC+AZT+NVP	1	2	0	0	2		1	2	2	1	2	2	0	105	9999999	76.11	76.76	3	9	1	1	2	2	1	2	2	2	2		0	0	2	0	1900-01-02	2	2	1	2014-07-01	684	2	2012-05-08
3658	1	2012-05-25	2012-05-29	36	162	51	19.43	EFV600+FTC+TDF	0	2	0	0	2		1	2	2	1	2	2	0	22	9999999	99.1	65.83	3	2	9	1	2	2	1	2	2	2	2		0	0	2	0	1900-01-02	2	2	1	2014-07-01	763	1	2012-05-07
3660	1	2012-05-28	2012-06-04	42	163	32	12.04	EFV600+FTC+TDF	0	2	1	0	2		1	2	2	1	2	2	0	124	9999999	49.6	77.77	4	2	1	2	0	0	0	0	0	0	2		0	0	2	0	1900-01-02	2	2	1	2014-07-01	757	2	2012-05-24
3663	1	2012-05-29	2012-05-30	32	170	42	14.53	EFV600+FTC+TDF	0	2	0	0	2		1	2	2	1	2	2	0	9	9999999	93.8	59.48	4	2	9	1	2	2	1	2	2	2	2		0	0	2	0	1900-01-02	2	2	1	2014-07-01	762	1	2012-05-10
3671	1	2012-05-31	2012-07-16	35	165	44	16.16	EFV600+FTC+TDF	0	2	0	0	2		1	2	2	1	1	2	0	11	9999999	100.9	56.32	4	2	9	2	0	0	0	0	0	0	2		0	0	2	0	1900-01-02	2	2	1	2014-07-01	715	1	2012-04-30
3677	1	2012-06-05	2012-06-15	32	171	46	15.73	EFV600+FTC+TDF	0	2	0	0	2		1	2	2	1	1	2	0	33	9999999	68.1	89.73	4	2	2	1	2	2	1	2	2	2	2		0	0	2	0	1900-01-02	2	2	1	2014-07-01	746	1	2012-06-05
3679	1	2012-06-06	2012-06-27	49	155	49	20.4	EFV600+FTC+TDF	0	2	0	0	2		1	2	2	1	2	2	1	86	9999999	94.7	57.92	3	1	2	2	0	0	0	0	0	0	2		0	0	2	0	1900-01-02	2	2	1	2014-07-01	734	1	2012-05-23
3680	0	2012-06-06	2012-06-27	47	144	48	23.15	EFV600+FTC+TDF	0	2	0	0	2		1	2	2	1	2	2	1	451	9999999	79.65	58.29	3	1	2	2	0	0	0	0	0	0	2		0	0	2	0	1900-01-02	2	2	1	2014-07-01	734	3	2012-06-06
3681	1	2012-06-06	2012-06-27	35	160	56	21.88	EFV600+FTC+TDF	0	2	0	0	2		1	2	2	1	2	2	1	125	9999999	74.34	97.29	3	1	2	1	2	2	1	2	2	2	2		0	0	2	0	1900-01-02	2	2	1	2014-07-01	734	2	2012-06-06
3684	1	2012-06-06	2012-06-06	29	164	58	21.56	EFV600+FTC+TDF	0	2	0	0	2		1	2	2	1	2	2	1	264	9999999	108.9	72.72	1	1	9	2	0	0	0	0	0	0	2		0	0	2	0	1900-01-02	2	2	1	2014-07-01	755	3	2012-05-16
3685	1	2012-06-06	2012-07-02	39	160	45	17.58	EFV600+FTC+TDF	0	2	0	0	2		1	2	2	1	2	2	0	58	9999999	73.5	76.06	3	2	2	2	0	0	0	0	0	0	2		0	0	2	0	1900-01-02	2	2	1	2014-07-01	729	1	2012-05-14
3687	1	2012-06-11	2013-11-11	46	148	43	19.63	3TC+AZT+NVP	1	2	0	0	2		1	2	2	1	2	2	0	6	9999999	102.66	48.43	4	9	9	1	2	2	1	2	2	2	2		0	0	2	0	1900-01-02	2	2	1	2014-07-01	232	1	2012-06-04
3689	1	2012-06-11	2012-07-09	27	172	56	18.93	EFV600+FTC+TDF	0	2	0	0	2		1	2	2	1	2	2	0	6	9999999	110.6	70.37	4	2	9	1	2	2	1	2	2	2	2		0	0	2	0	1900-01-02	2	2	2	2012-10-16	99	1	2012-05-16
3690	0	2012-06-11	2012-10-09	33	153	47	20.08	EFV600+FTC+TDF	0	2	0	0	2		1	2	2	1	2	2	0	488	9999999	81.42	64.24	3	2	9	2	0	0	0	0	0	0	2		0	0	2	0	1900-01-02	2	2	1	2014-07-01	630	3	2012-06-04
3692	0	2012-06-14	2013-03-19	16	152	52	22.51	3TC+EFV600+TDF	0	2	0	0	2		1	2	2	1	2	2	0	298	9999999	62.8	106.78	2	2	9	2	0	0	0	0	0	0	2		0	0	2	0	1900-01-02	2	2	1	2014-07-01	469	3	2012-06-14
3694	1	2012-06-15	2012-06-29	38	155	41	17.07	EFV600+FTC+TDF	0	2	0	0	2		1	2	2	1	2	2	0	79	9999999	65.5	78.53	4	2	2	2	0	0	0	0	0	0	2		0	0	2	0	1900-01-02	2	2	1	2014-07-01	732	1	2012-06-15
3701	0	2012-06-19	2013-09-11	33	147	45	20.82	3TC+AZT+NVP	1	2	0	0	2		1	2	2	1	2	2	0	104	0	74.3	67.4	3	2	9	1	2	2	1	2	2	2	2		0	0	2	0	1900-01-02	1	2	4	2014-02-10	152	2	2012-06-18
3705	0	2012-06-20	2013-10-09	50	151	62	27.19	3TC+AZT+NVP	1	1	0	0	9		1	2	2	1	2	2	0	862	0	41.59	139.53	3	2	9	2	0	0	0	0	0	0	2		0	0	2	0	1900-01-02	2	2	1	2014-07-01	265	3	2012-01-24
3706	1	2012-06-21	2012-07-23	34	160	46	17.97	EFV600+FTC+TDF	0	2	0	0	2		1	2	2	1	2	2	0	27	9999999	97.35	61.61	4	2	9	1	2	2	1	2	2	2	2		0	0	2	0	1900-01-02	1	2	4	2013-04-23	274	1	2012-06-06
371	1	2005-03-31	2013-09-19	46	168	63	22.32	3TC+AZT+NVP	1	1	0	0	2		1	2	2	1	2	2	0	645	0	92.92	78.39	3	9	9	2	0	0	0	0	0	0	2		1	0	2	0	1900-01-02	2	2	1	2014-07-01	285	3	2005-03-31
3711	1	2012-06-26	2012-07-10	40	157	41	16.63	EFV600+FTC+TDF	0	2	0	0	2		1	2	2	1	1	2	1	5	9999999	71.7	70.33	4	1	9	1	2	2	1	1	2	2	2		0	0	2	0	1900-01-02	1	2	4	2012-08-27	48	1	2012-06-18
3715	0	2012-06-27	2012-10-01	55	149	40	18.02	EFV600+FTC+TDF	0	2	0	0	2		1	2	2	1	2	2	0	400	9999999	39.8	88.84	3	2	9	2	0	0	0	0	0	0	2		0	0	2	0	1900-01-02	2	2	6	2014-04-09	555	3	2012-06-27
3718	0	2012-06-29	2012-09-27	45	137	39	20.78	3TC+D4T30+NVP	1	1	0	0	9		1	2	2	1	2	2	0	9999	0	69	55.84	2	2	9	2	0	0	0	0	0	0	2		1	0	2	0	1900-01-02	2	2	6	2014-07-01	642	3	2012-06-11
3721	1	2012-07-02	2012-07-26	45	170	51	17.65	EFV600+FTC+TDF	0	2	0	0	2		1	2	2	1	1	2	1	355	9999999	74.34	80.16	3	1	2	2	0	0	0	0	0	0	2		0	0	2	0	1900-01-02	2	2	1	2014-07-01	705	3	2012-05-10
3722	0	2012-07-03	2012-09-06	50	148	40	18.26	3TC+AZT+NVP	1	2	0	0	2		2	0	0	0	0	0	0	9999	9999999	61.06	61.32	2	2	9	2	0	0	0	0	0	0	2		0	0	2	0	1900-01-02	2	2	1	2014-07-01	663	3	2012-06-21
3726	1	2012-07-06	2012-07-18	40	164	62	23.05	EFV600+FTC+TDF	0	2	0	0	2		1	2	2	1	2	2	1	162	9999999	57.5	132.63	3	1	1	2	0	0	0	0	0	0	2		0	0	2	0	1900-01-02	2	2	1	2014-07-01	713	2	2012-07-02
3727	0	2012-07-06	2012-10-16	29	160	67	26.17	EFV600+FTC+TDF	0	2	0	0	2		1	2	2	1	2	2	0	192	9999999	62	124.75	3	2	2	1	2	2	1	2	2	2	2		0	0	2	0	1900-01-02	2	2	1	2014-07-01	623	2	2012-07-02
3728	1	2012-07-10	2012-08-03	52	165	56	20.57	EFV600+FTC+TDF	0	2	0	0	2		2	0	0	0	0	0	1	191	9999999	81	74.83	3	1	2	2	0	0	0	0	0	0	2		0	0	2	0	1900-01-02	2	2	1	2014-07-01	697	2	2012-07-10
3730	1	2012-07-11	2012-08-07	26	178	58	18.31	EFV600+FTC+TDF	0	2	0	0	2		1	2	2	1	2	2	0	4	9999999	73.3	110.95	4	2	2	2	0	0	0	0	0	0	2		0	0	2	0	1900-01-02	2	2	1	2014-07-01	693	1	2012-07-11
3731	0	2012-07-11	2012-09-11	43	159	37	14.64	3TC+AZT+EFV600	1	2	0	0	2		2	0	0	0	0	0	0	9999	9999999	50.45	73.99	3	2	2	2	0	0	0	0	0	0	2		0	0	2	0	1900-01-02	2	2	1	2014-07-01	658	3	2012-06-26
3732	1	2012-07-11	2012-07-30	38	162	49	18.67	EFV600+FTC+TDF	0	2	0	0	2		1	2	2	1	2	2	0	14	9999999	81	75.9	4	2	2	1	2	2	1	2	2	2	2		1	0	2	0	1900-01-02	2	2	1	2014-07-01	701	1	2012-07-09
3735	1	2012-07-12	2012-07-23	43	157	48	19.47	EFV600+FTC+TDF	0	2	0	0	2		1	2	2	1	2	2	0	10	9999999	79.2	72.31	4	2	9	1	2	2	1	2	2	2	2		0	0	2	0	1900-01-02	2	2	1	2014-07-01	708	1	2012-06-26
3737	1	2012-07-13	2012-07-27	36	158	46	18.43	3TC+AZT+NVP	1	2	0	0	2		1	2	2	1	2	2	0	52	9999999	93	63.27	3	2	9	1	2	2	1	2	2	2	2		0	0	2	0	1900-01-02	2	1	1	2014-07-01	704	1	2012-06-18
3738	1	2012-07-16	2012-07-31	37	159	43	17.01	EFV600+FTC+TDF	0	2	0	0	2		1	2	2	1	2	2	0	35	9999999	72.6	75.04	3	2	2	2	0	0	0	0	0	0	2		0	0	2	0	1900-01-02	2	2	1	2014-07-01	700	1	2012-07-16
3739	1	2012-07-16	2012-08-06	27	167	53	19	EFV600+FTC+TDF	0	2	0	0	2		1	2	2	1	2	2	0	274	9999999	52.21	141.09	2	2	9	1	2	2	1	2	2	2	2		0	0	2	0	1900-01-02	2	2	1	2014-07-01	694	3	2012-07-16
374	0	2005-04-04	2013-03-27	46	141	36	18.11	3TC+D4T30+NVP	1	1	0	0	2		1	2	2	1	2	2	9	497	9999999	58.41	60.25	2	9	9	2	0	0	0	0	0	0	2		0	0	2	0	1900-01-02	2	2	1	2014-07-01	461	3	2005-03-31
3740	0	2012-07-16	2012-07-24	31	147	43	19.9	EFV600+FTC+TDF	0	2	0	0	2		1	2	2	1	2	2	0	45	9999999	96.5	50.51	3	2	2	1	2	2	1	2	2	2	2		0	0	2	0	1900-01-02	2	2	1	2014-07-01	707	1	2012-07-13
3741	1	2012-07-16	2012-07-20	39	163	53	19.95	EFV600+FTC+TDF	0	2	0	0	2		1	2	2	1	2	2	0	13	9999999	76.1	86.52	3	2	1	1	2	2	1	2	2	2	2		0	0	2	0	1900-01-02	1	2	4	2012-09-13	55	1	2012-07-03
3742	1	2012-07-16	2012-08-06	30	158	44	17.63	EFV600+FTC+TDF	0	2	0	0	2		1	2	2	1	2	2	0	64	9999999	88.7	67.12	4	2	9	1	2	2	1	2	2	2	2		0	0	2	0	1900-01-02	1	2	4	2012-10-31	86	1	2012-07-09
3743	0	2012-07-16	2012-08-08	29	145	35	16.65	EFV600+FTC+TDF	0	2	0	0	2		1	2	2	1	2	2	0	13	9999999	46	87.83	4	2	9	1	2	2	1	2	2	2	2		0	0	2	0	1900-01-02	1	2	4	2012-11-06	90	1	2012-07-16
3744	0	2012-07-16	2013-10-29	41	150	47	20.89	3TC+D4T30+EFV600	1	1	0	0	2		1	2	2	1	2	2	0	705	9999999	56.64	85.44	4	2	2	2	0	0	0	0	0	0	2		0	0	2	0	1900-01-02	2	2	1	2014-07-01	245	3	2012-07-02
3745	1	2012-07-17	2012-08-14	32	159	41	16.22	EFV600+FTC+TDF	0	2	0	0	2		1	2	2	1	2	2	0	14	9999999	36	151.29	4	2	9	1	2	2	1	2	2	2	2		0	0	2	0	1900-01-02	1	2	4	2012-10-10	57	1	2012-07-17
3746	1	2012-07-17	2012-08-15	40	159	42	16.61	EFV600+FTC+TDF	0	2	0	0	2		1	2	2	1	2	2	0	13	9999999	65.5	78.87	4	2	2	1	2	2	1	2	2	2	2		0	0	2	0	1900-01-02	2	2	1	2014-07-01	685	1	2012-07-17
375	1	2005-04-04	2013-12-20	39	167	60	21.51	3TC+D4T30+NVP	1	1	0	0	2		1	2	2	1	2	2	0	475	0	75.22	99.09	3	9	9	2	0	0	0	0	0	0	2		0	0	2	0	1900-01-02	2	2	1	2014-07-01	193	3	2005-03-29
3750	1	2012-07-18	2012-08-21	41	166	54	19.6	EFV600+FTC+TDF	0	2	0	0	2		1	2	2	1	2	2	0	46	9999999	89.38	73.57	3	2	2	1	2	2	1	2	2	2	2		0	0	2	0	1900-01-02	2	2	1	2014-07-01	679	1	2012-07-18
3752	0	2012-07-18	2013-11-21	39	152	55.5	24.02	3TC+D4T30+EFV600	1	1	0	0	2		2	0	0	0	0	0	0	321	0	55.75	104.57	4	2	9	2	0	0	0	0	0	0	2		0	0	2	0	1900-01-02	2	2	1	2014-07-01	222	3	2012-07-05
3753	1	2012-07-23	2012-08-07	27	155	36	14.98	EFV600+FTC+TDF	0	2	0	0	2		1	2	2	1	2	2	1	9	9999999	72.6	68.92	4	1	9	1	2	2	1	2	2	2	2		0	0	2	0	1900-01-02	1	2	4	2012-09-05	29	1	2012-07-16
3754	1	2012-07-23	2012-08-01	35	168	58	20.55	EFV600+FTC+TDF	0	2	0	0	2		1	2	2	1	2	2	1	52	9999999	93.8	79.86	3	1	2	1	2	2	1	2	2	2	2		0	0	2	0	1900-01-02	2	2	1	2014-07-01	699	1	2012-07-10
3755	1	2012-07-23	2012-08-03	35	151	49	21.49	EFV600+FTC+TDF	0	2	1	0	2		1	2	2	1	2	2	0	70	9999999	77.9	81.24	3	2	9	1	2	2	1	1	2	2	2		0	1	2	0	1900-01-02	2	2	1	2014-07-01	697	1	2012-07-16
3756	0	2012-07-24	2012-08-15	47	151	54	23.68	EFV600+FTC+TDF	0	2	0	0	2		1	2	2	1	2	2	0	148	9999999	69	75.69	2	2	2	1	2	2	1	2	2	2	2		0	0	2	0	1900-01-02	2	2	1	2014-07-01	685	2	2012-07-23
3758	1	2012-07-25	2013-12-19	44	167	67	24.02	3TC+D4T30+NVP	1	1	0	0	2		2	0	0	0	0	0	0	622	0	53.1	148.99	3	2	9	2	0	0	0	0	0	0	2		0	1	2	0	1900-01-02	2	2	1	2014-07-01	194	3	2012-07-24
3759	1	2012-07-25	2012-08-01	43	155	41	17.07	EFV600+FTC+TDF	0	2	0	0	1	Fine right renal stone	1	2	2	1	2	2	0	85	9999999	66.4	73.67	3	2	2	1	2	2	1	2	2	2	2		0	0	2	0	1900-01-02	2	2	6	2014-02-18	566	1	2012-07-25
3760	0	2012-07-25	2012-07-27	33	149	36	16.22	EFV600+FTC+TDF	0	2	1	0	2		1	2	2	1	2	2	1	80	9999999	49.6	80.77	4	1	9	2	0	0	0	0	0	0	2		0	0	2	0	1900-01-02	2	2	6	2013-12-20	511	1	2012-06-18
3762	0	2012-07-26	2013-06-26	43	149	47	21.17	3TC+D4T30+NVP	1	1	0	0	2		2	0	0	0	0	0	0	478	0	107.08	44.28	3	2	9	2	0	0	0	0	0	0	2		0	0	2	0	1900-01-02	2	2	6	2014-07-01	370	3	2012-06-11
3763	1	2012-07-26	2012-08-15	43	157	46	18.66	EFV600+FTC+TDF	0	2	0	0	2		1	2	2	1	2	2	0	41	9999999	85.8	63.97	3	2	1	2	0	0	0	0	0	0	2		0	0	2	0	1900-01-02	2	2	1	2014-07-01	685	1	2012-07-24
3764	1	2012-07-26	2013-09-23	43	160	70	27.34	3TC+EFV600+TDF	0	2	0	0	2		1	2	2	1	2	2	0	435	9999999	97.35	85.79	3	2	9	2	0	0	0	0	0	0	2		0	0	2	0	1900-01-02	2	2	1	2014-07-01	281	3	2012-07-26
3765	1	2012-07-30	2012-08-28	42	162	54	20.58	EFV600+FTC+TDF	0	2	0	0	2		1	2	2	1	2	2	0	112	9999999	96.5	67.45	3	2	2	2	0	0	0	0	0	0	2		0	0	2	0	1900-01-02	2	2	1	2014-07-01	672	2	2012-07-30
3767	1	2012-07-31	2012-09-06	41	165	56	20.57	EFV600+FTC+TDF	0	2	0	0	2		1	2	2	1	2	2	0	18	9999999	99.1	68.81	3	2	2	1	2	2	1	2	2	2	2		0	0	2	0	1900-01-02	2	2	1	2014-07-01	663	1	2012-07-31
3770	0	2012-08-06	2012-09-10	39	151	40	17.54	EFV600+FTC+TDF	0	2	0	0	2		1	2	2	1	2	2	0	41	9999999	80	52.52	4	2	9	1	2	2	1	2	2	2	1	Chronic kidney disease	0	0	1	1	2013-03-14	2	2	5	2013-03-14	185	1	2012-08-06
3771	0	2012-08-07	2012-08-31	38	156	41	16.85	EFV600+FTC+TDF	0	2	0	0	2		1	2	2	1	2	2	0	43	9999999	62	70.15	4	2	2	1	2	2	1	2	2	2	2		0	0	2	0	1900-01-02	2	2	1	2014-07-01	669	1	2012-08-07
3772	0	2012-08-08	2012-08-15	39	149	50	22.52	EFV600+FTC+TDF	0	2	0	0	2		1	2	2	1	2	2	0	62	9999999	85.8	61.21	2	2	2	1	2	2	1	2	2	2	2		0	0	2	0	1900-01-02	2	2	1	2014-07-01	685	1	2012-07-27
3774	1	2012-08-08	2012-09-05	31	164	50	18.59	EFV600+FTC+TDF	0	2	0	0	2		1	2	2	1	2	2	0	322	9999999	119.5	56.1	3	2	2	2	0	0	0	0	0	0	2		0	0	2	0	1900-01-02	2	2	1	2014-07-01	664	3	2012-08-08
3775	0	2012-08-08	2012-08-22	38	150	52	23.11	EFV600+FTC+TDF	0	2	0	0	2		1	2	2	1	2	2	0	173	9999999	63.7	86.6	1	2	2	1	2	2	1	2	2	2	2		0	0	2	0	1900-01-02	2	2	1	2014-07-01	678	2	2012-08-08
3776	0	2012-08-09	2012-08-20	40	158	62	24.84	EFV600+FTC+TDF	0	2	0	0	2		1	2	2	1	2	2	0	217	9999999	67.3	95.81	3	2	2	2	0	0	0	0	0	0	2		0	0	2	0	1900-01-02	2	2	1	2014-07-01	680	3	2012-08-09
3778	1	2012-08-13	2012-09-10	31	161	51	19.68	EFV600+FTC+TDF	0	2	0	0	2		1	2	2	1	2	2	0	16	9999999	83.2	82.18	4	2	9	1	2	2	1	2	2	2	2		0	0	2	0	1900-01-02	2	2	1	2014-07-01	659	1	2012-08-13
3780	1	2012-08-13	2012-09-06	37	160	55	21.48	EFV600+FTC+TDF	0	2	0	0	2		2	0	0	0	0	0	0	56	9999999	96.5	72.21	3	2	1	2	0	0	0	0	0	0	2		0	0	1	2	2014-07-01	2	2	5	2014-07-01	663	1	2012-07-24
3781	0	2012-08-15	2012-09-03	38	150	43	19.11	EFV600+FTC+TDF	0	2	0	0	2		1	2	2	1	2	2	0	163	9999999	66.4	68.7	3	2	9	1	2	2	1	2	2	2	2		0	0	2	0	1900-01-02	2	2	1	2014-07-01	666	2	2012-08-15
3789	1	2012-08-27	2012-09-24	29	153	52	22.21	EFV600+FTC+TDF	0	2	0	0	2		2	0	0	0	0	0	0	378	9999999	113.3	62.66	3	2	2	2	0	0	0	0	0	0	2		0	0	2	0	1900-01-02	2	2	1	2014-07-01	645	3	2012-08-27
3790	1	2012-08-27	2012-09-07	36	159	49	19.38	EFV600+FTC+TDF	0	2	0	0	2		1	2	2	1	2	2	0	394	9999999	69.92	89.65	4	2	9	2	0	0	0	0	0	0	2		0	0	2	0	1900-01-02	2	2	1	2014-07-01	662	3	2012-08-21
3791	0	2012-08-28	2012-09-12	41	148	60	27.39	EFV600+FTC+TDF	0	2	0	0	2		1	2	2	1	2	2	1	247	9999999	69	89.53	1	1	2	2	0	0	0	0	0	0	2		0	0	2	0	1900-01-02	2	2	1	2014-07-01	657	3	2012-08-28
3792	0	2012-08-28	2012-09-11	30	164	50	18.59	EFV600+FTC+TDF	0	2	0	0	2		1	2	2	1	2	2	0	15	9999999	66.38	86.17	3	2	9	2	0	0	0	0	0	0	2		0	0	2	0	1900-01-02	2	2	1	2014-07-01	658	1	2012-08-28
3793	0	2012-08-29	2012-08-31	48	150	48	21.33	EFV600+FTC+TDF	0	2	0	0	2		1	2	2	1	2	2	0	184	9999999	77.9	58.96	3	2	2	2	0	0	0	0	0	0	2		0	0	2	0	1900-01-02	2	2	1	2014-07-01	669	2	2012-08-15
3794	0	2012-08-30	2012-09-10	32	153	60	25.63	EFV600+FTC+TDF	0	2	0	0	2		1	2	2	1	2	2	1	66	9999999	132.75	50.77	4	1	2	2	0	0	0	0	0	0	2		0	0	2	0	1900-01-02	2	2	1	2014-07-01	659	1	2012-08-14
3795	1	2012-08-30	2012-08-30	35	154	56	23.61	EFV600+FTC+TDF	0	2	0	0	2		1	2	2	1	2	2	0	240	9999999	96.5	74.95	3	2	2	2	0	0	0	0	0	0	2		0	0	2	0	1900-01-02	2	2	1	2014-07-01	670	3	2012-08-14
3797	1	2012-08-31	2012-08-31	38	163	51	19.2	EFV600+FTC+TDF	0	2	0	0	2		1	2	2	1	2	2	0	29	9999999	84.96	75.31	3	2	9	1	2	2	1	2	2	2	2		0	0	2	0	1900-01-02	2	1	3	2013-04-22	234	1	2012-08-31
3798	1	2012-09-03	2012-10-10	34	166	43	15.6	EFV600+FTC+TDF	0	2	0	0	2		1	2	2	1	2	2	0	17	9999999	61.95	90.5	4	2	9	1	2	2	1	2	2	2	2		0	0	2	0	1900-01-02	1	2	4	2013-06-28	261	1	2012-09-03
38	1	2004-10-22	2013-05-13	38	166	67	24.31	3TC+D4T+EFV600	1	1	0	0	2		1	2	2	1	2	2	0	609	0	107.97	77.85	3	9	9	2	0	0	0	0	0	0	2		0	0	2	0	1900-01-02	2	2	1	2014-07-01	414	3	2004-10-21
3802	0	2012-09-04	2012-09-17	41	146	41	19.23	EFV600+FTC+TDF	0	2	0	0	2		1	2	2	1	2	2	0	206	9999999	84.1	50.19	3	2	2	2	0	0	0	0	0	0	2		0	0	2	0	1900-01-02	2	2	1	2014-07-01	652	3	2012-09-04
3803	1	2012-09-05	2012-09-24	42	152	51	22.07	EFV600+FTC+TDF	0	2	0	0	1	Left renal stone	1	2	2	1	2	2	1	212	9999999	92	66.82	3	1	1	2	0	0	0	0	0	0	2		0	0	2	0	1900-01-02	2	2	1	2014-07-01	645	3	2012-09-05
3807	1	2012-09-05	2012-10-03	49	157	38	15.42	EFV600+FTC+TDF	0	2	0	0	2		1	2	2	1	2	2	0	21	9999999	64.7	65.74	4	2	9	1	2	2	1	2	2	2	2		0	0	2	0	1900-01-02	1	1	4	2014-01-24	478	1	2012-09-03
3808	1	2012-09-05	2012-11-07	36	161	53	20.45	EFV600+FTC+TDF	0	2	0	0	2		1	2	2	1	2	2	0	231	9999999	111.5	60.81	4	2	9	1	2	2	1	2	2	2	2		0	0	2	0	1900-01-02	1	1	4	2012-12-04	27	3	2012-09-05
3809	1	2012-09-06	2012-09-14	34	169	49	17.16	EFV600+FTC+TDF	0	2	0	0	2		1	2	2	1	2	2	0	176	9999999	90.27	70.77	3	2	9	2	0	0	0	0	0	0	2		0	0	2	0	1900-01-02	2	2	1	2014-07-01	655	2	2012-09-04
3810	1	2012-09-06	2012-09-13	52	166	64	23.23	EFV600+FTC+TDF	0	2	0	0	2		1	2	2	1	2	2	0	97	9999999	84.1	82.37	2	2	9	1	2	2	1	2	2	2	2		0	0	2	0	1900-01-02	2	2	1	2014-07-01	656	1	2012-09-04
3813	1	2012-09-07	2012-09-21	39	163	59	22.21	EFV600+FTC+TDF	0	2	0	0	2		1	2	2	1	2	2	0	319	9999999	107.1	68.44	1	2	9	2	0	0	0	0	0	0	2		0	0	2	0	1900-01-02	2	2	1	2014-07-01	648	3	2012-09-07
3814	1	2012-09-10	2012-10-02	29	162	63	24.01	EFV600+FTC+TDF	0	2	0	0	2		1	2	2	1	2	2	0	38	9999999	35.4	242.98	3	2	9	1	2	2	1	2	2	2	2		0	0	2	0	1900-01-02	2	2	1	2014-07-01	637	1	2012-09-10
3815	0	2012-09-10	2012-09-24	34	151	65	28.51	EFV600+FTC+TDF	0	2	0	0	2		1	2	2	1	2	2	0	279	9999999	75.2	95.29	3	2	9	2	0	0	0	0	0	0	2		0	0	2	0	1900-01-02	2	2	1	2014-07-01	645	3	2012-09-10
3816	1	2012-09-10	2012-10-01	30	163	58	21.83	EFV600+FTC+TDF	0	2	0	0	2		1	2	2	1	2	2	0	46	9999999	92	85.3	3	2	9	2	0	0	0	0	0	0	2		0	0	2	0	1900-01-02	2	2	1	2014-07-01	638	1	2012-09-06
3817	0	2012-09-10	2013-03-06	53	150	42	18.67	EFV600+FTC+TDF	0	2	0	0	2		1	2	2	1	1	2	0	377	9999999	59.3	64.08	3	2	1	2	0	0	0	0	0	0	2		0	0	2	0	1900-01-02	2	2	1	2014-07-01	482	3	2012-08-13
3820	0	2012-09-11	2012-09-19	44	151	57	25	EFV600+FTC+TDF	0	2	0	0	2		1	2	2	1	2	2	0	256	9999999	93.8	60.67	3	2	9	2	0	0	0	0	0	0	2		0	0	2	0	1900-01-02	2	2	1	2014-07-01	650	3	2012-09-05
3821	1	2012-09-11	2012-09-24	34	170	56	19.38	EFV600+FTC+TDF	0	2	0	0	2		1	2	2	1	2	2	0	107	9999999	114.16	63.96	3	2	9	1	2	2	1	2	2	2	2		0	0	2	0	1900-01-02	2	2	1	2014-07-01	645	2	2012-09-11
3823	1	2012-09-11	2012-09-19	34	167	65	23.31	EFV600+FTC+TDF	0	2	0	0	2		2	0	0	0	0	0	1	127	9999999	115.1	73.63	4	1	9	2	0	0	0	0	0	0	2		0	0	2	0	1900-01-02	2	2	1	2014-07-01	650	2	2012-09-05
3825	0	2012-09-12	2012-09-21	33	152	52	22.51	EFV600+FTC+TDF	0	2	0	0	2		1	2	2	1	2	2	0	75	9999999	64.6	89.58	3	2	9	1	2	2	1	2	2	2	2		0	0	2	0	1900-01-02	2	2	1	2014-07-01	648	1	2012-09-10
3826	1	2012-09-13	2013-09-18	39	155	50	20.81	3TC+EFV600+TDF	0	2	0	0	2		1	2	2	1	2	2	0	337	9999999	93.81	66.21	1	2	9	2	0	0	0	0	0	0	2		0	0	2	0	1900-01-02	2	2	1	2014-07-01	286	3	2012-09-06
3828	1	2012-09-13	2012-09-28	29	157	39	15.82	EFV600+FTC+TDF	0	2	0	0	2		1	2	2	1	2	2	0	20	9999999	70.8	75.21	3	2	2	1	2	2	1	2	2	2	2		0	0	2	0	1900-01-02	1	2	4	2012-11-19	52	1	2012-09-13
3829	0	2012-09-13	2012-09-28	52	148	37	16.89	EFV600+FTC+TDF	0	2	1	0	2		1	2	2	1	2	2	0	271	9999999	64.6	52.42	4	2	9	2	0	0	0	0	0	0	2		0	0	2	0	1900-01-02	2	2	6	2014-03-31	549	3	2012-09-13
3830	1	2012-09-17	2012-10-09	25	161	43	16.59	EFV600+FTC+TDF	0	2	0	0	2		1	2	2	1	1	2	0	12	9999999	85	71.56	4	2	9	1	2	2	1	1	2	2	2		0	0	2	0	1900-01-02	1	2	4	2012-11-07	29	1	2012-09-17
3831	1	2012-09-17	2012-10-04	43	152	47	20.34	EFV600+FTC+TDF	0	2	0	0	2		1	2	2	1	2	2	1	89	9999999	101.8	55.08	4	1	9	2	0	0	0	0	0	0	2		0	0	2	0	1900-01-02	2	2	2	2014-03-20	532	1	2012-09-17
3837	0	2012-09-17	2012-10-05	32	147	39	18.05	EFV600+FTC+TDF	0	2	0	0	2		1	2	2	1	2	2	0	57	9999999	57.52	76.16	3	2	2	2	0	0	0	0	0	0	2		0	0	2	0	1900-01-02	2	2	1	2014-07-01	634	1	2012-09-06
3838	0	2012-09-18	2013-09-16	27	155	50	20.81	3TC+EFV600+TDF	0	2	0	0	2		2	0	0	0	0	0	1	339	9999999	69.92	84.04	1	1	9	2	0	0	0	0	0	0	2		0	0	2	0	1900-01-02	2	2	1	2014-07-01	288	3	2012-09-18
3840	1	2012-09-18	2012-10-09	33	161	44	16.97	EFV600+FTC+TDF	0	2	0	0	2		1	2	2	1	2	2	0	217	9999999	70.8	81.79	4	2	9	2	0	0	0	0	0	0	2		0	0	2	0	1900-01-02	2	2	6	2014-05-06	574	3	2012-09-14
3841	0	2012-09-19	2012-10-05	30	157	35	14.2	EFV600+FTC+TDF	0	2	0	0	2		1	2	2	1	2	2	0	25	9999999	58.41	68.55	4	2	2	1	2	2	1	2	2	2	2		0	0	2	0	1900-01-02	2	2	1	2014-07-01	634	1	2012-09-19
3842	0	2012-09-19	2012-10-08	56	149	45	20.27	EFV600+FTC+TDF	0	2	0	0	2		1	2	2	1	2	2	0	41	9999999	66.4	59.2	4	2	9	1	2	2	1	2	2	2	2		0	0	2	0	1900-01-02	2	2	1	2014-07-01	631	1	2012-09-19
3844	1	2012-09-19	2012-10-04	45	153	41	17.51	EFV600+FTC+TDF	0	2	0	0	2		1	2	2	1	2	2	0	35	9999999	47.8	100.23	4	2	2	1	2	2	1	2	2	2	2		0	0	2	0	1900-01-02	2	2	1	2014-07-01	635	1	2012-09-11
3845	0	2012-09-20	2012-10-04	45	157	44	17.85	EFV600+FTC+TDF	0	2	0	0	2		1	2	2	1	2	2	0	112	9999999	86.7	50.14	2	2	2	1	2	2	1	2	2	2	2		0	0	2	0	1900-01-02	2	2	1	2014-07-01	635	2	2012-09-20
3847	0	2012-09-20	2013-12-24	44	134	37	20.61	3TC+D4T30+EFV600	1	1	0	0	2		1	2	2	1	2	2	0	304	0	34.52	107.01	3	2	9	1	2	2	1	2	2	2	2		0	0	2	0	1900-01-02	2	2	1	2014-07-01	189	3	2012-09-20
3849	0	2012-09-20	2012-11-06	49	149	46	20.72	EFV600+FTC+TDF	0	2	0	0	2		1	2	2	1	2	2	1	28	9999999	61	71.37	3	1	9	2	0	0	0	0	0	0	2		1	0	2	0	1900-01-02	2	2	6	2014-05-15	555	1	2012-09-20
3850	0	2012-09-20	2012-09-28	44	158	53	21.23	EFV600+FTC+TDF	0	2	0	0	2		1	2	2	1	2	2	0	457	9999999	85	62.25	3	2	2	2	0	0	0	0	0	0	2		0	0	2	0	1900-01-02	2	2	1	2014-07-01	641	3	2012-09-10
3852	1	2012-09-21	2012-10-02	40	153	48	20.5	EFV600+FTC+TDF	0	2	0	0	2		1	2	2	1	2	2	0	160	9999999	115.1	51.29	4	2	9	2	0	0	0	0	0	0	2		0	0	2	0	1900-01-02	2	2	1	2014-07-01	637	2	2012-09-21
3853	1	2012-09-24	2012-10-10	39	160	57	22.27	EFV600+FTC+TDF	0	2	0	0	2		1	2	2	1	2	2	0	143	9999999	106.2	66.68	3	2	9	1	2	2	1	2	2	2	2		0	0	2	0	1900-01-02	2	2	1	2014-07-01	629	2	2012-09-24
3857	1	2012-09-24	2012-10-17	42	159	53	20.96	EFV600+FTC+TDF	0	2	0	0	2		1	2	2	1	2	2	0	318	9999999	51.3	124.53	3	2	9	1	2	2	1	2	2	2	2		0	0	2	0	1900-01-02	2	2	1	2014-07-01	622	3	2012-09-24
3859	1	2012-09-26	2013-01-16	41	169	58	20.31	EFV600+FTC+TDF	0	2	0	0	2		1	2	2	1	2	2	1	278	9999999	68.1	103.71	2	1	1	2	0	0	0	0	0	0	2		0	0	2	0	1900-01-02	2	2	1	2014-07-01	531	3	2012-09-26
3860	0	2012-09-26	2012-10-03	47	155	41	17.07	EFV600+FTC+TDF	0	2	0	0	2		1	2	2	1	2	2	0	16	9999999	63.7	62.25	4	2	9	1	2	2	1	2	2	2	2		0	0	2	0	1900-01-02	2	2	1	2014-07-01	636	1	2012-09-26
3861	1	2012-09-26	2012-10-12	38	156	48	19.72	EFV600+FTC+TDF	0	2	0	0	2		1	2	2	1	2	2	1	92	9999999	119.5	50.39	4	1	9	1	2	2	1	2	2	2	2		0	0	2	0	1900-01-02	2	2	6	2014-04-08	543	1	2012-09-26
3865	1	2012-09-28	2012-10-15	40	158	45	18.03	EFV600+FTC+TDF	0	2	0	0	2		1	2	2	1	2	2	1	205	9999999	72.57	76.27	3	1	9	1	2	2	1	2	2	2	2		0	0	2	0	1900-01-02	2	2	1	2014-07-01	624	3	2012-09-28
3866	1	2012-09-28	2012-10-15	28	166	43	15.6	EFV600+FTC+TDF	0	2	0	0	2		1	2	2	1	1	2	0	29	9999999	72.6	81.59	4	2	9	1	2	2	1	2	2	2	2		0	0	2	0	1900-01-02	2	2	1	2014-07-01	624	1	2012-09-28
3870	1	2012-10-02	2012-10-10	21	150	40	17.78	EFV600+FTC+TDF	0	2	0	0	2		1	2	2	1	2	2	1	60	9999999	77.9	75.16	3	1	9	1	2	2	1	2	2	2	2		0	0	2	0	1900-01-02	2	2	1	2014-07-01	629	1	2012-10-02
3872	1	2012-10-04	2012-10-08	36	175	53	17.31	EFV600+FTC+TDF	0	2	0	0	2		1	2	2	1	2	2	0	421	9999999	104.4	64.94	3	2	2	2	0	0	0	0	0	0	2		0	0	2	0	1900-01-02	2	2	1	2014-07-01	631	3	2012-09-26
3876	1	2012-10-03	2012-10-10	34	163	44	16.56	EFV600+FTC+TDF	0	2	0	0	2		1	2	2	1	2	2	0	16	9999999	103.54	55.41	3	2	2	1	2	2	1	2	2	2	2		0	0	2	0	1900-01-02	2	2	1	2014-07-01	629	1	2012-07-09
3878	0	2012-10-03	2012-10-05	37	151	52	22.81	EFV600+FTC+TDF	0	2	0	0	2		1	2	2	1	2	2	0	216	9999999	97.4	57.19	3	2	9	2	0	0	0	0	0	0	2		0	0	2	0	1900-01-02	2	2	1	2014-07-01	634	3	2012-09-26
3879	0	2012-10-04	2012-11-12	33	153	33	14.1	EFV600+FTC+TDF	0	2	0	0	2		1	2	2	1	1	2	0	29	9999999	45.1	81.42	4	2	9	2	0	0	0	0	0	0	2		0	0	2	0	1900-01-02	2	2	1	2014-07-01	596	1	2012-10-04
388	1	2005-04-08	2012-08-23	44	173	62	20.72	3TC+D4T30+NVP	1	1	0	0	2		2	0	0	0	0	0	9	954	0	88.5	82.72	3	9	9	2	0	0	0	0	0	0	2		0	0	2	0	1900-01-02	2	2	1	2014-07-01	677	3	2005-04-04
3881	0	2012-10-05	2012-10-09	40	145	45	21.4	EFV600+FTC+TDF	0	2	0	0	2		1	2	2	1	2	2	0	325	9999999	85.8	54.55	1	2	9	2	0	0	0	0	0	0	2		0	0	2	0	1900-01-02	2	2	1	2014-07-01	630	3	2012-09-18
3884	1	2012-10-05	2012-12-27	32	174	57	18.83	EFV600+FTC+TDF	0	2	0	0	2		1	2	2	1	2	2	0	7	9999999	63.7	118.87	3	2	9	2	0	0	0	0	0	0	2		0	0	2	0	1900-01-02	1	1	4	2013-09-06	253	1	2012-10-02
3887	0	2012-10-08	2012-10-18	40	140	39	19.9	EFV600+FTC+TDF	0	2	0	0	2		1	2	2	1	2	2	0	32	9999999	79.7	50.89	3	2	9	2	0	0	0	0	0	0	2		1	1	2	0	1900-01-02	2	2	1	2014-07-01	621	1	2012-10-03
3888	1	2012-10-08	2012-10-22	42	167	58	20.8	EFV600+FTC+TDF	0	2	0	0	2		1	2	2	1	2	2	0	374	9999999	65.5	106.74	3	2	9	2	0	0	0	0	0	0	2		0	0	2	0	1900-01-02	2	2	2	2014-01-14	449	3	2012-10-05
3889	0	2012-10-08	2012-11-02	45	157	39	15.82	EFV600+FTC+TDF	0	2	0	0	2		1	2	2	1	2	2	0	20	9999999	59.3	64.98	4	2	9	2	0	0	0	0	0	0	2		0	0	2	0	1900-01-02	2	2	1	2014-07-01	606	1	2012-10-05
3892	1	2012-10-09	2012-10-23	62	158	50	20.03	EFV600+FTC+TDF	0	2	0	0	2		1	2	2	1	2	2	0	98	9999999	89.39	53.66	3	2	9	1	2	2	1	2	2	2	2		0	0	2	0	1900-01-02	2	2	6	2014-05-08	562	1	2012-10-09
3897	1	2012-10-15	2012-11-05	25	170	50	17.3	EFV600+FTC+TDF	0	2	0	0	2		1	2	2	1	2	2	0	10	9999999	76.1	92.94	4	2	9	1	2	2	1	2	2	2	2		0	0	2	0	1900-01-02	2	2	1	2014-07-01	603	1	2012-10-15
3899	1	2012-10-15	2012-10-16	27	157	50	20.28	EFV600+FTC+TDF	0	2	0	0	2		1	2	2	1	2	2	0	141	9999999	92.9	74.81	3	2	9	1	2	2	1	2	2	2	2		0	0	2	0	1900-01-02	2	2	1	2014-07-01	623	2	2012-09-28
3901	0	2012-10-17	2012-11-02	28	144	38	18.33	EFV600+FTC+TDF	0	2	0	0	2		1	2	2	1	2	2	1	86	9999999	85.8	51.59	3	1	9	1	2	2	1	2	2	2	2		0	0	2	0	1900-01-02	1	2	4	2013-03-04	122	1	2012-10-17
3902	1	2012-10-14	2012-11-14	33	163	45	16.94	EFV600+FTC+TDF	0	2	0	0	2		1	2	2	1	2	2	0	15	9999999	57.5	103	4	2	2	1	2	2	1	2	2	2	2		0	0	1	2	2014-06-09	2	2	5	2014-06-09	572	1	2012-10-12
3903	1	2012-10-18	2012-11-30	26	168	57	20.2	EFV600+FTC+TDF	0	2	0	0	2		1	2	2	1	2	2	0	14	9999999	93.8	85.21	4	2	2	1	2	2	1	2	2	2	2		0	0	2	0	1900-01-02	1	2	4	2013-05-28	179	1	2012-10-18
3904	0	2012-10-18	2013-05-20	40	150	51	22.67	3TC+EFV600+TDF	0	2	0	0	2		1	2	2	1	2	2	0	299	9999999	94.6	56.07	2	2	9	2	0	0	0	0	0	0	2		0	0	2	0	1900-01-02	2	2	1	2014-07-01	407	3	2012-10-17
3909	1	2012-10-22	2012-11-05	44	162	49	18.67	EFV600+FTC+TDF	0	2	1	0	2		1	2	2	1	2	2	0	240	9999999	89.4	64.72	3	2	9	2	0	0	0	0	0	0	2		0	1	2	0	1900-01-02	2	2	1	2014-07-01	603	3	2012-10-15
3910	1	2012-10-22	2012-11-05	35	158	55	22.03	EFV600+FTC+TDF	0	2	0	0	2		1	2	2	1	2	2	0	38	9999999	104.4	68.04	3	2	9	1	2	2	1	2	2	2	2		0	0	2	0	1900-01-02	1	2	4	2013-02-28	115	1	2012-10-22
3913	1	2012-10-23	2012-11-05	39	176	53	17.11	EFV600+FTC+TDF	0	2	0	0	2		1	2	2	1	2	2	0	13	9999999	104.4	63.07	4	2	9	1	2	2	1	2	2	2	2		0	0	2	0	1900-01-02	2	2	1	2014-07-01	603	1	2012-10-23
3915	0	2012-10-24	2012-11-06	45	150	51	22.67	EFV600+FTC+TDF	0	2	0	0	2		1	2	2	1	2	2	0	185	9999999	85.9	58.66	3	2	2	1	2	2	1	2	2	2	2		0	0	2	0	1900-01-02	2	2	1	2014-07-01	602	2	2012-10-24
3916	0	2012-10-24	2012-10-31	36	162	45	17.15	EFV600+FTC+TDF	0	2	0	0	2		1	2	2	1	1	2	0	22	9999999	70.8	68.75	4	2	2	1	2	2	1	2	2	2	2		0	0	2	0	1900-01-02	1	2	4	2013-03-21	141	1	2012-10-24
3918	0	2012-10-24	2012-11-06	32	148	40	18.26	EFV600+FTC+TDF	0	2	0	0	2		1	2	2	1	2	2	0	76	9999999	59.3	75.76	4	2	9	2	0	0	0	0	0	0	2		0	0	2	0	1900-01-02	2	2	1	2014-07-01	602	1	2012-10-24
3919	0	2012-10-24	2012-11-26	28	148	42	19.17	3TC+AZT+NVP	1	2	0	0	2		1	2	2	1	2	2	0	9999	9999999	82.31	59.44	3	2	9	2	0	0	0	0	0	0	2		0	0	2	0	1900-01-02	2	2	6	2014-07-01	582	3	2012-10-24
3920	0	2012-10-24	2012-11-14	39	160	57	22.27	EFV600+FTC+TDF	0	2	0	0	2		1	2	2	1	2	2	0	76	9999999	76.8	77.96	4	2	9	1	2	2	1	2	2	2	2		0	0	2	0	1900-01-02	2	2	1	2014-07-01	594	1	2012-10-24
3921	1	2012-10-24	2012-11-14	41	159	56	22.15	EFV600+FTC+TDF	0	2	0	0	2		1	2	2	1	2	2	0	612	9999999	77	88.56	3	2	9	2	0	0	0	0	0	0	2		0	0	2	0	1900-01-02	2	2	1	2014-07-01	594	3	2012-10-24
3923	0	2012-10-25	2012-11-16	39	151	43	18.86	EFV600+FTC+TDF	0	2	0	0	2		1	2	2	1	2	2	0	93	9999999	86.7	52.1	4	2	9	2	0	0	0	0	0	0	2		0	0	2	0	1900-01-02	2	2	1	2014-07-01	592	1	2012-10-25
3924	1	2012-10-25	2012-12-18	32	171	56	19.15	EFV600+FTC+TDF	0	2	0	0	2		1	2	2	1	2	2	0	38	9999999	81.4	91.39	4	2	2	2	0	0	0	0	0	0	2		0	0	2	0	1900-01-02	2	2	1	2014-07-01	560	1	2012-10-25
3925	1	2012-10-29	2012-11-12	40	160	50	19.53	EFV600+FTC+TDF	0	2	0	0	2		1	2	2	1	2	2	0	143	9999999	87.4	70.37	4	2	9	1	2	2	1	2	2	2	2		0	0	2	0	1900-01-02	2	2	6	2014-05-06	540	2	2012-10-29
3934	1	2012-11-01	2013-10-22	38	163	59	22.21	3TC+EFV600+TDF	0	2	0	0	2		1	2	2	1	2	2	0	333	9999999	117.71	62.88	2	2	9	2	0	0	0	0	0	0	2		0	0	2	0	1900-01-02	2	2	1	2014-07-01	252	3	2012-10-29
3935	0	2012-11-02	2012-12-07	33	146	39	18.3	EFV600+FTC+TDF	0	2	0	0	2		1	2	2	1	2	2	0	185	9999999	54	80.37	3	2	2	1	2	2	1	2	2	2	2		0	0	2	0	1900-01-02	2	2	2	2014-04-30	509	2	2012-11-02
3937	1	2012-11-02	2013-01-25	31	160	55	21.48	EFV600+FTC+TDF	0	2	0	0	2		1	2	2	1	2	2	0	17	9999999	77.9	94.66	3	2	9	2	0	0	0	0	0	0	2		0	0	2	0	1900-01-02	2	2	1	2014-07-01	522	1	2012-11-02
3940	0	2012-11-02	2013-11-12	31	146	44	20.64	3TC+AZT+NVP	1	2	0	0	2		1	2	2	1	1	2	0	230	9999999	86.73	57.51	4	2	9	2	0	0	0	0	0	0	2		0	0	2	0	1900-01-02	2	2	1	2014-07-01	231	3	2012-11-01
3941	1	2012-11-02	2012-11-15	35	163	57	21.45	EFV600+FTC+TDF	0	2	0	0	2		1	2	2	1	2	2	1	191	9999999	108	68.16	3	1	9	1	2	2	1	2	2	2	2		0	0	2	0	1900-01-02	2	2	1	2014-07-01	593	2	2012-10-31
3943	1	2012-11-06	2012-11-12	46	158	51	20.43	EFV600+FTC+TDF	0	2	0	0	2		1	2	2	1	2	2	0	88	9999999	111.51	52.88	3	2	9	1	2	2	1	2	2	2	2		0	0	2	0	1900-01-02	2	2	1	2014-07-01	596	1	2012-10-29
3945	1	2012-11-07	2012-11-15	39	163	55	20.7	EFV600+FTC+TDF	0	2	0	0	2		1	2	2	1	2	2	0	88	9999999	134.5	50.8	3	2	1	1	2	2	1	2	2	2	2		0	0	2	0	1900-01-02	2	2	1	2014-07-01	593	1	2012-11-05
3946	1	2012-11-12	2012-11-29	35	160	46	17.97	EFV600+FTC+TDF	0	2	0	0	2		1	2	2	1	2	2	0	29	9999999	104.4	56.91	3	2	9	1	2	2	1	2	2	2	2		0	0	2	0	1900-01-02	1	2	4	2013-07-06	219	1	2012-11-12
3947	0	2012-11-12	2012-11-20	49	154	51	21.5	EFV600+FTC+TDF	0	2	0	0	2		1	2	2	1	2	2	0	41	9999999	62.83	76.82	3	2	9	1	2	2	1	2	2	2	2		0	1	2	0	1900-01-02	2	2	1	2014-07-01	588	1	2012-11-12
3948	0	2012-11-12	2012-11-19	33	154	57	24.03	EFV600+FTC+TDF	0	2	0	0	2		1	2	2	1	2	2	0	313	9999999	97.4	65.12	3	2	9	2	0	0	0	0	0	0	2		0	0	2	0	1900-01-02	2	2	1	2014-07-01	589	3	2012-11-05
3949	1	2012-11-13	2012-12-04	31	155	36	14.98	EFV600+FTC+TDF	0	2	0	0	2		1	2	2	1	2	2	0	20	9999999	64.6	74.71	4	2	1	1	2	2	1	2	2	2	2		0	0	2	0	1900-01-02	2	2	6	2014-06-18	561	1	2012-11-13
3950	0	2012-11-13	2012-11-27	28	161	42	16.2	EFV600+FTC+TDF	0	2	0	0	2		1	2	2	1	1	2	0	14	9999999	69	70.9	4	2	9	2	0	0	0	0	0	0	2		0	0	2	0	1900-01-02	2	2	1	2014-07-01	581	1	2012-11-13
3952	0	2012-11-14	2013-12-11	34	159	50	19.78	3TC+D4T30+EFV600	1	1	0	0	2		1	2	2	1	1	2	0	365	0	33.63	163.9	4	2	9	1	2	2	1	2	2	2	2		0	0	2	0	1900-01-02	2	2	1	2014-07-01	202	3	2012-11-14
3953	1	2012-11-14	2012-12-05	38	161	67	25.85	EFV600+FTC+TDF	0	2	0	0	2		1	2	2	1	2	2	0	19	9999999	96	87.56	3	2	2	1	2	2	1	2	2	2	2		0	0	2	0	1900-01-02	2	2	1	2014-07-01	573	1	2012-11-14
3955	1	2012-11-14	2013-12-19	37	158	50	20.03	3TC+AZT+NVP	1	1	0	0	2		1	2	2	1	2	2	0	112	0	67.26	94.18	3	9	9	1	2	2	1	2	2	2	2		0	0	2	0	1900-01-02	2	2	1	2014-07-01	194	2	2012-11-12
3956	1	2012-11-15	2012-12-03	24	160	50	19.53	EFV600+FTC+TDF	0	2	0	0	2		1	2	2	1	2	2	1	284	9999999	100.9	70.7	3	1	2	2	0	0	0	0	0	0	2		0	0	2	0	1900-01-02	2	2	1	2014-07-01	575	3	2012-11-15
3957	1	2012-11-15	2012-11-29	48	163	61	22.96	EFV600+FTC+TDF	0	2	0	0	2		1	2	2	1	2	2	0	288	9999999	104.4	66.12	3	2	2	2	0	0	0	0	0	0	2		0	0	2	0	1900-01-02	2	2	1	2014-07-01	579	3	2012-11-12
3958	0	2012-11-15	2013-12-23	37	167	66	23.67	3TC+EFV600+TDF	0	2	0	0	2		2	0	0	0	0	0	1	637	9999999	46	153.69	2	1	2	1	2	2	1	2	2	2	2		0	0	2	0	1900-01-02	2	2	1	2014-07-01	190	3	2012-05-22
3959	0	2012-11-15	2012-12-07	23	148	42	19.17	EFV600+FTC+TDF	0	2	0	0	2		1	2	2	1	2	2	0	12	9999999	62.8	81.38	3	2	2	2	0	0	0	0	0	0	2		0	0	2	0	1900-01-02	2	2	1	2014-07-01	571	1	2012-11-14
3960	1	2012-11-16	2012-12-06	41	168	63	22.32	EFV600+FTC+TDF	0	2	0	0	2		1	2	2	1	2	2	0	34	9999999	87.6	87.57	3	2	2	1	2	2	1	2	2	2	2		0	0	2	0	1900-01-02	2	2	1	2014-07-01	572	1	2012-11-16
3961	1	2012-11-16	2012-12-10	40	155	54	22.48	EFV600+FTC+TDF	0	2	0	0	2		1	2	2	1	2	2	0	28	9999999	89.4	74.3	3	2	9	1	2	2	1	2	2	2	2		0	0	2	0	1900-01-02	2	2	1	2014-07-01	568	1	2012-11-16
3962	0	2012-11-16	2013-03-08	25	140	37	18.88	3TC+AZT+EFV600	1	2	0	0	2		1	2	2	1	2	2	0	9999	9999999	87.61	50.51	3	2	9	1	2	2	1	2	2	2	2		0	0	2	0	1900-01-02	2	2	6	2014-07-01	480	3	2012-11-16
3963	1	2012-11-19	2012-12-07	37	163	43	16.18	EFV600+FTC+TDF	0	2	0	0	2		1	2	2	1	2	2	0	7	9999999	90.3	60.33	4	2	2	2	0	0	0	0	0	0	2		0	0	2	0	1900-01-02	2	2	1	2014-07-01	571	1	2012-11-19
3964	1	2012-11-19	2012-12-21	40	172	63	21.3	EFV600+FTC+TDF	0	1	0	0	2		1	2	2	1	2	2	9	23	9999999	77	100.64	3	1	9	1	2	2	1	2	2	2	2		0	0	2	0	1900-01-02	1	2	4	2013-01-18	28	1	2012-11-19
3965	0	2012-11-19	2012-12-07	43	158	46	18.43	EFV600+FTC+TDF	0	2	0	0	2		1	2	2	1	2	2	0	184	9999999	65.5	70.85	3	2	2	1	2	2	1	2	2	2	2		0	0	2	0	1900-01-02	2	2	1	2014-07-01	571	2	2012-11-19
3967	1	2012-11-20	2012-12-06	32	166	53	19.23	EFV600+FTC+TDF	0	2	0	0	2		1	2	2	1	2	2	0	169	9999999	128.3	54.88	2	2	9	2	0	0	0	0	0	0	2		0	0	2	0	1900-01-02	2	1	3	2013-08-29	266	2	2012-11-20
3968	1	2012-11-21	2012-08-20	41	160	50	19.53	D4T/3TC/NVP	1	1	0	0	2		1	2	2	1	2	2	0	188	9999999	999	999	3	2	9	1	2	2	1	2	2	2	2		0	0	2	0	1900-01-02	2	2	1	2014-07-01	680	2	2012-11-07
3969	1	2012-11-22	2012-12-06	42	155	53	22.06	EFV600+FTC+TDF	0	2	1	0	2		1	2	2	1	2	2	0	42	9999999	93.8	68.11	4	2	9	1	1	2	1	2	2	1	2		0	1	2	0	1900-01-02	2	2	1	2014-07-01	572	1	2012-11-09
3970	0	2012-11-23	2012-12-11	35	148	37	16.89	EFV600+FTC+TDF	0	2	0	0	2		1	2	2	1	2	2	0	9	9999999	53.1	76.09	4	2	2	1	2	2	1	2	2	2	2		0	0	2	0	1900-01-02	2	2	1	2014-07-01	567	1	2012-11-23
3971	1	2012-11-23	2012-12-15	43	162	46	17.53	EFV600+FTC+TDF	0	2	0	0	2		1	2	2	1	2	2	0	18	9999999	72.6	75.6	4	2	2	1	2	2	1	2	2	2	2		0	0	2	0	1900-01-02	1	2	4	2012-12-19	4	1	2012-11-19
3975	1	2012-11-26	2012-12-04	38	161	50	19.29	EFV600+FTC+TDF	0	2	0	0	2		1	2	2	1	2	2	0	92	9999999	80.5	77.93	3	2	9	1	2	2	1	2	2	2	2		0	0	2	0	1900-01-02	2	2	1	2014-07-01	574	1	2012-11-19
3979	0	2012-11-29	2012-12-12	42	152	55	23.81	EFV600+FTC+TDF	0	2	0	0	2		1	2	2	1	2	2	0	51	9999999	91.2	61.46	3	2	9	1	2	2	1	2	2	2	2		0	0	2	0	1900-01-02	2	2	1	2014-07-01	566	1	2012-11-29
3981	1	2012-11-29	2012-12-26	25	175	53	17.31	EFV600+FTC+TDF	0	2	0	0	2		1	2	2	1	2	2	0	37	9999999	55.8	134.35	4	2	2	1	2	2	1	2	2	2	2		0	0	2	0	1900-01-02	2	2	1	2014-07-01	552	1	2012-11-29
3982	0	2012-11-29	2013-06-25	33	167	77	27.61	3TC+AZT+NVP	1	2	0	0	2		1	2	2	1	2	2	0	424	9999999	71.69	119.52	3	2	9	2	0	0	0	0	0	0	2		0	0	2	0	1900-01-02	2	2	1	2014-07-01	371	3	2012-11-29
3984	1	2012-11-29	2012-12-15	29	157	39	15.82	EFV600+FTC+TDF	0	2	0	0	2		1	2	2	1	2	2	1	16	9999999	96.5	55.18	3	1	2	2	0	0	0	0	0	0	2		0	0	2	0	1900-01-02	2	2	1	2014-07-01	563	1	2012-11-21
3986	1	2012-11-29	2012-12-10	39	162	51	19.43	EFV600+FTC+TDF	0	2	0	0	2		1	2	2	1	2	2	0	292	9999999	77.9	81.33	3	2	2	1	2	2	1	2	2	2	2		0	0	2	0	1900-01-02	2	2	1	2014-07-01	568	3	2012-11-19
3988	1	2012-12-03	2012-12-15	39	166	62	22.5	EFV600+FTC+TDF	0	2	0	0	2		1	2	2	1	2	2	0	28	9999999	131.9	58.39	3	2	2	1	2	2	1	2	2	2	2		0	0	2	0	1900-01-02	2	2	1	2014-07-01	563	1	2012-12-03
3989	1	2012-12-03	2012-12-31	36	164	62	23.05	EFV600+FTC+TDF	0	2	0	0	2		1	2	2	1	2	2	1	54	9999999	122.1	64.96	4	1	2	1	2	2	1	2	2	2	2		0	0	2	0	1900-01-02	2	2	1	2014-07-01	547	1	2012-12-03
3990	0	2012-12-03	2012-12-13	36	154	44	18.55	EFV600+FTC+TDF	0	2	0	0	2		1	2	2	1	2	2	0	486	9999999	71.7	66.37	3	2	9	2	0	0	0	0	0	0	2		0	0	2	0	1900-01-02	2	2	1	2014-07-01	565	3	2012-12-03
3991	0	2012-12-04	2012-12-31	33	159	36	14.24	EFV600+FTC+TDF	0	2	0	0	2		1	2	2	1	2	2	0	8	9999999	58.4	68.6	4	2	9	1	2	2	1	2	2	2	2		0	0	2	0	1900-01-02	1	2	4	2013-02-22	53	1	2012-12-03
3992	1	2012-12-05	2013-09-17	37	167	58	20.8	3TC+EFV600+TDF	0	2	0	0	2		1	2	2	1	2	2	0	336	9999999	61.95	118.61	1	2	1	2	0	0	0	0	0	0	2		0	0	2	0	1900-01-02	2	2	1	2014-07-01	287	3	2012-12-05
3993	1	2012-12-05	2012-12-31	37	161	55	21.22	EFV600+FTC+TDF	0	2	0	0	2		1	2	2	1	1	2	0	10	9999999	108	64.52	4	2	2	1	2	2	1	2	2	2	2		0	0	2	0	1900-01-02	2	2	1	2014-07-01	547	1	2012-12-03
3994	1	2012-12-06	2012-12-26	30	156	45	18.49	EFV600+FTC+TDF	0	2	0	0	2		1	2	2	1	2	2	0	58	9999999	70.8	86	3	2	2	2	0	0	0	0	0	0	2		0	0	2	0	1900-01-02	2	2	1	2014-07-01	552	1	2012-12-06
3995	0	2012-12-06	2013-09-26	30	147	47	21.75	3TC+EFV600+TDF	0	2	0	0	2		2	0	0	0	0	0	1	606	9999999	87.61	61.37	2	1	2	2	0	0	0	0	0	0	2		0	0	2	0	1900-01-02	2	2	1	2014-07-01	278	3	2012-12-06
3996	1	2012-12-10	2012-12-27	43	158	44	17.63	EFV600+FTC+TDF	0	2	0	0	2		1	2	2	1	2	2	0	125	9999999	88.5	59.32	3	2	9	2	0	0	0	0	0	0	1	Bilateral nephropathy	0	0	2	0	1900-01-02	1	1	4	2013-06-20	175	2	2012-12-10
3997	0	2012-12-10	2012-12-19	32	145	49	23.31	EFV600+FTC+TDF	0	2	0	0	2		1	2	2	1	2	2	0	347	9999999	70.8	77.74	3	2	9	2	0	0	0	0	0	0	2		0	0	2	0	1900-01-02	2	2	1	2014-07-01	559	3	2012-12-06
3998	0	2012-12-10	2012-12-28	33	141	51	25.65	EFV600+FTC+TDF	0	2	0	0	2		1	2	2	1	2	2	0	353	9999999	60.2	94.27	4	2	2	1	2	2	1	2	2	2	2		0	0	2	0	1900-01-02	2	2	1	2014-07-01	550	3	2012-12-07
3999	0	2012-12-11	2012-12-15	39	154	48	20.24	EFV600+FTC+TDF	0	2	0	0	2		1	2	2	1	2	2	0	138	9999999	86.7	58.15	3	2	9	2	0	0	0	0	0	0	2		0	0	2	0	1900-01-02	2	2	1	2014-07-01	563	2	2012-11-29
4000	0	2012-12-11	2012-12-26	37	160	44	17.19	EFV600+FTC+TDF	0	2	0	0	2		1	2	2	1	2	2	0	94	9999999	84.1	56.04	3	2	9	1	2	2	1	2	2	2	2		0	0	2	0	1900-01-02	2	2	1	2014-07-01	552	1	2012-12-10
4002	1	2012-12-11	2012-12-21	35	158	55	22.03	EFV600+FTC+TDF	0	2	0	0	2		1	2	2	1	2	2	0	256	9999999	85	83.57	3	2	2	1	2	2	1	2	2	2	2		0	0	2	0	1900-01-02	2	2	1	2014-07-01	557	3	2012-12-11
4003	1	2012-12-11	2012-12-28	26	161	58	22.38	EFV600+FTC+TDF	0	2	0	0	2		1	2	2	1	2	2	0	80	9999999	136.3	59.67	3	2	2	1	2	2	1	2	2	2	2		0	0	2	0	1900-01-02	2	2	1	2014-07-01	550	1	2012-12-11
4006	0	2012-12-12	2012-12-20	35	154	57	24.03	EFV600+FTC+TDF	0	2	0	0	2		1	2	2	1	2	2	0	212	9999999	85	73.23	2	2	2	1	2	2	1	2	2	2	2		0	0	2	0	1900-01-02	2	2	1	2014-07-01	558	3	2012-12-10
4008	1	2012-12-14	2012-12-21	33	170	49	16.96	EFV600+FTC+TDF	0	2	0	0	2		1	2	2	1	2	2	0	9	9999999	103.5	62.31	4	2	2	1	2	2	1	2	2	2	2		0	0	2	0	1900-01-02	1	2	4	2013-05-06	136	1	2012-12-11
4009	0	2012-12-14	2012-12-28	30	160	63	24.61	EFV600+FTC+TDF	0	2	0	0	2		1	2	2	1	2	2	0	317	9999999	77	93.6	2	2	2	2	0	0	0	0	0	0	2		0	1	2	0	1900-01-02	2	2	1	2014-07-01	550	3	2012-12-14
401	1	2005-04-22	2013-07-08	42	169	62	21.71	3TC+D4T30+NVP	1	1	0	1	2		1	2	2	1	2	2	9	374	0	77.88	95.96	4	2	9	2	0	0	0	0	0	0	2		1	0	2	0	1900-01-02	2	2	1	2014-07-01	358	3	2005-04-22
4011	0	2012-12-17	2013-01-02	25	141	40	20.12	EFV600+FTC+TDF	0	2	0	0	2		1	2	2	1	2	2	0	8	9999999	72.6	65.9	3	2	9	2	0	0	0	0	0	0	2		0	0	2	0	1900-01-02	2	2	1	2014-07-01	545	1	2012-12-17
4012	0	2012-12-18	2013-01-01	47	159	36	14.24	EFV600+FTC+TDF	0	2	0	0	2		1	2	2	1	2	2	0	14	9999999	49.6	70.2	4	2	2	1	2	2	1	2	2	2	2		0	0	2	0	1900-01-02	2	2	1	2014-07-01	546	1	2012-12-18
4013	1	2012-12-19	2012-12-31	24	154	45	18.97	EFV600+FTC+TDF	0	2	0	0	2		1	2	2	1	2	2	0	9	9999999	57.5	111.66	4	2	2	1	2	2	1	2	2	2	2		0	0	2	0	1900-01-02	2	2	1	2014-07-01	547	1	2012-12-19
4015	1	2012-12-26	2013-01-08	45	150	43	19.11	EFV600+FTC+TDF	0	2	0	0	2		1	2	2	1	2	2	0	76	9999999	94.7	53.06	3	2	1	1	2	2	1	2	2	2	2		0	0	2	0	1900-01-02	2	2	1	2014-07-01	539	1	2012-12-26
4017	1	2012-12-26	2013-01-07	45	163	46	17.31	EFV600+FTC+TDF	0	2	0	0	2		1	2	2	1	2	2	0	74	9999999	80.5	66.77	4	2	2	1	2	2	1	2	2	2	2		0	0	2	0	1900-01-02	2	2	1	2014-07-01	540	1	2012-12-26
4018	1	2012-12-26	2013-01-14	41	171	55	18.81	EFV600+FTC+TDF	0	2	0	0	2		1	2	2	1	1	2	0	198	9999999	121.2	55.26	3	2	1	1	2	2	1	2	2	2	2		0	0	2	0	1900-01-02	2	2	1	2014-07-01	533	2	2012-12-26
4020	1	2012-12-26	2013-01-09	45	167	52	18.65	EFV600+FTC+TDF	0	2	0	0	2		1	2	2	1	2	2	1	36	9999999	104.4	58.2	3	1	9	1	2	2	1	2	2	2	2		0	0	2	0	1900-01-02	1	2	4	2014-06-20	527	1	2012-12-26
4021	1	2012-12-27	2013-01-14	24	166	50	18.14	EFV600+FTC+TDF	0	2	0	0	2		1	2	2	1	2	2	0	351	9999999	114.2	62.47	3	2	2	2	0	0	0	0	0	0	2		0	0	2	0	1900-01-02	2	2	1	2014-07-01	533	3	2012-12-27
4022	1	2012-12-27	2013-01-10	36	156	56	23.01	EFV600+FTC+TDF	0	2	0	0	2		1	2	2	1	2	2	1	141	9999999	77	93.03	1	1	1	1	2	2	1	2	2	2	2		0	0	2	0	1900-01-02	2	2	1	2014-07-01	537	2	2012-12-27
4024	0	2012-12-27	2013-01-14	45	157	61	24.75	EFV600+FTC+TDF	0	2	1	0	2		1	2	2	1	2	2	0	665	9999999	78.8	76.48	3	2	2	2	0	0	0	0	0	0	2		0	1	2	0	1900-01-02	2	2	1	2014-07-01	533	3	2012-12-17
4028	1	2012-12-31	2013-07-18	26	162	46	17.53	3TC+EFV600+TDF	0	2	0	0	2		1	2	2	1	2	2	0	281	9999999	103.5	62.32	1	1	1	2	0	0	0	0	0	0	2		0	0	2	0	1900-01-02	2	2	1	2014-07-01	348	3	2012-09-06
4029	0	2013-01-02	2013-01-21	47	153	53	22.64	EFV600+FTC+TDF	0	2	0	0	2		1	2	2	1	2	2	0	135	9999999	59.3	86.44	2	2	2	1	2	2	1	2	2	2	2		0	0	2	0	1900-01-02	2	2	1	2014-07-01	526	2	2013-01-02
4030	1	2013-01-02	2013-01-15	44	150	45	20	EFV600+FTC+TDF	0	2	0	0	2		1	2	2	1	2	2	0	238	9999999	95.6	55.58	2	2	9	1	2	2	1	2	2	2	2		0	0	2	0	1900-01-02	2	2	1	2014-07-01	532	3	2013-01-02
4031	1	2013-01-07	2013-01-22	29	151	54	23.68	EFV600+FTC+TDF	0	2	0	0	2		1	2	2	1	2	2	0	39	9999999	54.8	134.54	4	2	9	2	0	0	0	0	0	0	2		0	0	2	0	1900-01-02	1	2	2	2013-04-29	326	1	2013-01-07
4033	0	2013-01-07	2013-01-23	39	148	54	24.65	EFV600+FTC+TDF	0	2	0	0	2		1	2	2	1	2	2	0	246	9999999	64.9	87.4	2	2	1	1	2	2	1	2	2	2	2		0	0	2	0	1900-01-02	2	2	1	2014-07-01	524	3	2013-01-07
4034	1	2013-01-07	2013-02-11	48	167	62	22.23	EFV600+FTC+TDF	0	2	0	0	2		1	2	2	1	2	2	0	501	9999999	69	101.68	3	2	2	1	2	2	1	2	2	2	2		0	0	2	0	1900-01-02	2	2	1	2014-07-01	505	3	2013-01-07
4035	0	2013-01-08	2013-12-27	55	156	47	19.31	3TC+AZT/D4T+NVP	1	1	1	0	2		1	2	2	1	2	2	1	61	0	56.64	73.35	4	1	2	1	2	2	1	2	2	2	2		1	1	2	0	1900-01-02	2	2	6	2014-07-01	186	1	2013-01-08
4039	0	2013-01-08	2013-10-10	32	148	63	28.76	3TC+EFV600+TDF	0	2	0	0	2		1	2	2	1	2	2	0	248	9999999	95.58	74.03	1	2	9	2	0	0	0	0	0	0	2		0	0	2	0	1900-01-02	2	2	1	2014-07-01	264	3	2013-01-08
4040	1	2013-01-08	2013-01-23	37	157	55	22.31	EFV600+FTC+TDF	0	2	0	0	2		1	2	2	1	2	2	0	109	9999999	82.3	84.67	4	2	9	1	2	2	1	2	2	2	2		0	0	2	0	1900-01-02	1	2	4	2013-02-24	32	2	2013-01-08
4041	0	2013-01-08	2013-01-17	38	159	51	20.17	EFV600+FTC+TDF	0	2	0	0	2		1	2	2	1	2	2	0	142	9999999	105.3	51.38	1	2	2	1	2	2	1	2	2	2	2		0	0	2	0	1900-01-02	2	2	1	2014-07-01	530	2	2013-01-08
4042	1	2013-01-09	2013-01-24	31	161	50	19.29	EFV600+FTC+TDF	0	2	0	0	2		1	2	2	1	2	2	0	21	9999999	107.1	62.59	3	2	9	1	2	2	1	2	2	2	2		0	0	2	0	1900-01-02	2	1	3	2013-03-28	63	1	2013-01-09
4043	0	2013-01-10	2013-02-14	30	164	52	19.33	EFV600+FTC+TDF	0	2	0	0	2		1	2	2	2	1	2	0	26	9999999	64.6	92.09	4	2	2	2	0	0	0	0	0	0	2		0	0	2	0	1900-01-02	2	1	2	2013-06-28	134	1	2013-01-10
4044	1	2013-01-10	2013-03-05	44	157	57	23.12	EFV600+FTC+TDF	0	2	0	0	2		1	2	2	1	2	2	0	42	9999999	102.7	65.54	3	2	1	1	2	2	1	2	2	2	2		0	0	2	0	1900-01-02	2	2	1	2014-07-01	483	1	2013-01-10
4045	1	2013-01-10	2013-04-24	34	162	67	25.53	3TC+EFV600+TDF	0	2	1	0	2		1	2	2	1	2	2	0	288	9999999	123.9	70.5	2	2	9	2	0	0	0	0	0	0	2		0	0	2	0	1900-01-02	2	2	1	2014-07-01	433	3	2013-01-10
4046	1	2013-01-14	2013-02-04	28	165	44	16.16	EFV600+FTC+TDF	0	2	0	0	2		1	2	2	1	1	2	0	47	9999999	68.4	88.62	4	2	9	1	2	2	1	2	2	2	2		0	0	2	0	1900-01-02	1	2	4	2013-05-22	107	1	2013-01-14
4047	1	2013-01-16	2013-02-13	40	165	43	15.79	EFV600+FTC+TDF	0	2	1	0	2		1	2	2	1	2	2	0	5	9999999	88.5	59.76	4	2	2	1	2	2	1	2	2	2	2		1	0	2	0	1900-01-02	2	2	1	2014-07-01	503	1	2013-01-16
4048	0	2013-01-16	2013-01-28	37	156	55	22.6	EFV600+FTC+TDF	0	2	0	0	2		1	2	2	1	2	2	0	213	9999999	93.8	62.81	3	2	1	2	0	0	0	0	0	0	2		0	0	2	0	1900-01-02	2	2	1	2014-07-01	519	3	2013-01-16
4049	1	2013-01-17	2013-01-30	54	170	81	28.03	EFV600+FTC+TDF	0	2	0	0	2		1	2	2	1	2	2	0	67	9999999	115.9	73.93	4	2	2	1	2	2	1	2	2	2	2		0	0	2	0	1900-01-02	2	2	1	2014-07-01	517	1	2013-01-17
4051	1	2013-01-21	2013-10-23	38	163	52	19.57	3TC+D4T30+NVP	1	1	0	0	2		1	2	2	1	2	2	1	64	0	84.89	76.85	3	1	9	2	0	0	0	0	0	0	2		0	0	2	0	1900-01-02	2	2	1	2014-07-01	251	1	2013-01-21
4055	1	2013-01-23	2013-02-08	35	160	51	19.92	EFV600+FTC+TDF	0	2	0	0	2		1	2	2	1	2	2	0	320	9999999	76.1	86.55	4	2	1	2	0	0	0	0	0	0	2		0	0	2	0	1900-01-02	2	2	1	2014-07-01	508	3	2013-01-23
4057	1	2013-01-24	2013-04-11	37	165	54	19.83	3TC+EFV600+TDF	0	2	0	0	2		1	2	2	1	2	2	0	374	9999999	58.4	117.14	4	2	9	2	0	0	0	0	0	0	2		0	0	2	0	1900-01-02	2	2	1	2014-07-01	446	3	2013-01-24
4059	1	2013-01-28	2012-03-15	32	170	48.5	16.78	D4T/3TC/EFV	1	1	0	0	2		2	0	0	0	0	0	0	567	9999999	999	999	3	2	2	2	0	0	0	0	0	0	2		0	0	2	0	1900-01-02	2	2	1	2014-07-01	838	3	2013-01-28
4060	1	2013-01-28	2013-03-04	46	165	52	19.1	EFV600+FTC+TDF	0	2	0	0	2		1	2	2	1	2	2	0	129	9999999	85.8	70.07	3	2	2	2	0	0	0	0	0	0	2		0	0	2	0	1900-01-02	2	2	1	2014-07-01	484	2	2013-01-28
4061	0	2013-01-28	2013-02-18	42	148	38	17.35	EFV600+FTC+TDF	0	2	0	0	2		1	2	2	1	2	2	0	161	9999999	50.44	76.78	4	2	2	2	0	0	0	0	0	0	2		0	0	2	0	1900-01-02	2	2	1	2014-07-01	498	2	2013-01-28
4062	1	2013-01-28	2013-02-07	43	154	51	21.5	EFV600+FTC+TDF	0	2	0	0	2		1	2	2	1	2	2	0	339	9999999	68.1	89.35	2	2	2	2	0	0	0	0	0	0	2		0	0	2	0	1900-01-02	2	2	1	2014-07-01	509	3	2013-01-28
4063	0	2013-01-29	2013-02-21	30	152	44	19.04	EFV600+FTC+TDF	0	2	0	0	2		1	2	2	1	2	2	0	18	9999999	61.06	82.44	4	2	2	1	2	2	1	2	2	2	2		0	0	2	0	1900-01-02	2	2	1	2014-07-01	495	1	2013-01-29
4064	0	2013-01-29	2013-04-08	37	147	36	16.66	3TC+EFV600+TDF	0	2	0	0	2		1	2	2	1	1	2	0	54	9999999	46	83.83	4	2	2	2	0	0	0	0	0	0	2		0	0	2	0	1900-01-02	2	2	6	2014-04-02	359	1	2013-01-29
4065	1	2013-01-29	2013-02-28	48	164	61	22.68	EFV600+FTC+TDF	0	2	0	0	2		1	2	2	1	2	2	0	82	9999999	75.22	91.77	4	2	1	1	2	2	1	2	2	2	2		0	0	2	0	1900-01-02	2	2	1	2014-07-01	488	1	2013-01-29
4066	1	2013-01-29	2013-02-15	32	163	50	18.82	EFV600+FTC+TDF	0	2	0	0	2		1	2	2	1	2	2	0	274	9999999	68.14	97.48	3	2	1	2	0	0	0	0	0	0	2		0	0	2	0	1900-01-02	2	2	1	2014-07-01	501	3	2013-01-29
4067	0	2013-01-29	2013-02-13	32	144	44	21.22	EFV600+FTC+TDF	0	2	0	0	2		1	2	2	1	2	2	0	190	9999999	45.1	109.58	3	2	9	2	0	0	0	0	0	0	2		0	0	2	0	1900-01-02	2	2	1	2014-07-01	503	2	2013-01-29
4068	0	2013-01-31	2013-02-11	34	159	33	13.05	EFV600+FTC+TDF	0	2	0	0	2		1	2	2	1	2	2	0	104	9999999	54	67.37	4	2	9	1	2	2	1	2	2	2	2		0	0	2	0	1900-01-02	2	2	1	2014-07-01	505	2	2013-01-31
4069	0	2013-01-31	2013-02-14	54	141	35	17.6	EFV600+FTC+TDF	0	2	0	0	2		1	2	2	1	2	2	0	66	9999999	60.2	52	4	2	2	2	0	0	0	0	0	0	2		0	0	2	0	1900-01-02	2	2	6	2014-02-14	365	1	2013-01-31
4072	1	2013-02-05	2013-02-14	29	167	62	22.23	EFV600+FTC+TDF	0	2	0	0	2		1	2	2	1	2	2	0	144	9999999	120.4	70.31	2	2	9	1	2	2	1	2	2	2	2		0	0	2	0	1900-01-02	2	2	1	2014-07-01	502	2	2013-02-05
4073	1	2013-02-05	2013-03-06	46	168	62	21.97	EFV600+FTC+TDF	0	2	0	0	2		1	2	2	1	2	2	0	71	9999999	69.9	102.55	4	2	9	1	2	2	1	2	2	2	2		0	0	2	0	1900-01-02	2	2	1	2014-07-01	482	1	2013-02-05
4075	0	2013-02-07	2013-02-18	50	143	54	26.41	EFV600+FTC+TDF	0	2	0	0	2		1	2	2	1	1	2	0	196	9999999	81.42	62.08	3	2	2	2	0	0	0	0	0	0	2		0	0	2	0	1900-01-02	2	2	1	2014-07-01	498	2	2013-02-07
4077	0	2013-02-11	2013-02-28	40	151	41	17.98	EFV600+FTC+TDF	0	2	0	0	2		1	2	2	1	2	2	0	117	9999999	72.57	58.76	3	2	2	2	0	0	0	0	0	0	2		0	0	2	0	1900-01-02	2	2	1	2014-07-01	488	2	2013-02-11
4078	1	2013-02-11	2013-03-05	50	165	74	27.18	EFV600+FTC+TDF	0	2	0	0	2		1	2	2	1	2	2	0	108	9999999	100	81.92	4	2	9	2	0	0	0	0	0	0	2		0	0	2	0	1900-01-02	2	2	1	2014-07-01	483	2	2013-02-11
4079	0	2013-02-13	2013-02-20	29	153	51	21.79	EFV600+FTC+TDF	0	2	0	0	2		1	2	2	1	2	2	0	316	9999999	100.89	58.36	1	2	2	2	0	0	0	0	0	0	2		0	0	2	0	1900-01-02	2	2	1	2014-07-01	496	3	2013-02-13
4080	1	2013-02-13	2013-03-06	37	163	66	24.84	EFV600+FTC+TDF	0	2	0	0	2		1	2	2	1	2	2	1	296	9999999	97.4	85.85	3	1	1	2	0	0	0	0	0	0	2		0	0	2	0	1900-01-02	1	2	4	2013-04-07	32	3	2013-02-13
4081	0	2013-02-13	2013-03-04	37	152	36	15.58	3TC+EFV600+TDF	0	2	0	0	2		1	2	2	1	2	2	0	35	9999999	61.1	63.11	3	2	9	1	2	2	1	2	2	2	2		0	0	2	0	1900-01-02	2	2	1	2014-07-01	484	1	2013-02-13
4082	1	2013-02-13	2013-02-27	36	159	50	19.78	EFV600+FTC+TDF	0	2	0	0	2		1	2	2	1	2	2	1	169	9999999	99.1	64.54	3	1	9	1	2	2	1	2	2	2	2		0	0	2	0	1900-01-02	2	2	1	2014-07-01	489	2	2013-02-13
4083	1	2013-02-13	2013-03-07	43	164	51	18.96	EFV600+FTC+TDF	0	2	0	0	2		1	2	2	1	2	2	0	90	9999999	88.5	68.75	4	2	2	1	2	2	1	2	2	2	2		0	0	2	0	1900-01-02	2	2	1	2014-07-01	481	1	2013-02-13
4084	1	2013-02-14	2013-02-25	40	162	57	21.72	EFV600+FTC+TDF	0	2	0	0	2		1	2	2	1	2	2	0	98	9999999	107.08	65.47	4	2	1	1	2	2	1	2	2	2	2		0	0	2	0	1900-01-02	2	2	1	2014-07-01	491	1	2013-02-14
4085	1	2013-02-15	2013-02-28	35	168	54	19.13	EFV600+FTC+TDF	0	2	0	0	2		1	2	2	1	2	2	0	70	9999999	119.47	58.38	3	2	2	1	2	2	1	2	2	2	2		0	0	2	0	1900-01-02	2	2	1	2014-07-01	488	1	2013-02-15
4086	0	2013-02-15	2013-03-11	35	148	46	21	3TC+EFV600+TDF	0	2	0	0	2		1	2	2	1	1	2	0	62	9999999	78.8	63.75	4	2	9	2	0	0	0	0	0	0	2		0	0	2	0	1900-01-02	2	2	1	2014-07-01	477	1	2013-02-15
4088	0	2013-02-18	2013-03-01	28	153	55	23.5	EFV600+FTC+TDF	0	2	0	0	2		1	2	2	2	1	2	0	84	9999999	93.81	68.29	4	2	9	2	0	0	0	0	0	0	2		0	0	2	0	1900-01-02	2	2	1	2014-07-01	487	1	2013-02-18
4089	0	2013-02-19	2013-03-14	53	148	41	18.72	3TC+EFV600+TDF	0	2	0	0	1	UTI	1	2	2	1	2	2	0	218	9999999	58.4	63.52	2	2	9	1	2	2	1	2	2	2	2		0	0	2	0	1900-01-02	2	2	6	2014-03-13	364	3	2013-02-19
4090	1	2013-02-19	2013-03-04	34	161	56	21.6	EFV600+FTC+TDF	0	2	0	0	2		1	2	2	1	2	2	0	197	9999999	107.1	68.17	2	2	2	2	0	0	0	0	0	0	2		0	0	2	0	1900-01-02	2	2	1	2014-07-01	484	2	2013-02-19
4091	0	2013-02-19	2013-07-03	29	144	46	22.18	3TC+EFV600+TDF	0	2	0	0	2		1	2	2	1	2	2	0	312	9999999	96.46	55.05	3	2	2	1	2	2	1	2	2	2	2		0	0	2	0	1900-01-02	2	2	1	2014-07-01	363	3	2013-02-19
4093	0	2013-02-20	2012-12-06	39	143	37	18.09	EFV600+FTC+TDF	0	2	0	0	2		1	2	2	1	2	2	0	60	9999999	89.03	43.65	4	2	2	1	2	2	1	2	2	2	2		0	0	2	0	1900-01-02	2	2	1	2014-07-01	572	1	2012-10-24
4094	1	2013-02-20	2013-03-07	38	167	49	17.57	EFV600+FTC+TDF	0	2	0	0	2		1	2	2	1	2	2	0	57	9999999	101.8	60.39	4	2	1	1	2	2	1	2	2	2	2		0	0	2	0	1900-01-02	1	2	4	2013-03-29	22	1	2013-02-20
4095	1	2013-02-21	2013-03-11	28	165	49	18	3TC+EFV600+TDF	0	2	0	0	2		1	2	2	1	2	2	0	28	9999999	115.9	58.24	4	2	9	1	2	2	1	2	2	2	2		0	0	2	0	1900-01-02	1	2	4	2013-06-10	91	1	2013-02-21
4096	1	2013-02-22	2013-03-28	34	169	50	17.51	EFV600+FTC+TDF	0	2	0	0	2		1	2	2	1	2	2	0	25	9999999	97.4	66.93	4	2	9	1	2	2	1	2	2	2	2		0	0	2	0	1900-01-02	2	2	1	2014-07-01	460	1	2013-02-22
4097	1	2013-02-22	2013-03-22	38	163	45	16.94	EFV600+FTC+TDF	0	2	0	0	2		1	2	2	1	2	2	0	10	9999999	45.1	125.18	4	2	2	1	2	2	1	2	2	2	2		0	0	2	0	1900-01-02	2	2	1	2014-07-01	466	1	2013-02-22
4098	1	2013-02-22	2013-03-08	45	167	50	17.93	EFV600+FTC+TDF	0	2	0	0	2		1	2	2	1	2	2	1	91	9999999	67.3	86.81	4	1	2	1	2	2	1	2	2	2	2		0	0	2	0	1900-01-02	2	2	1	2014-07-01	480	1	2013-02-19
410	0	2005-04-26	2013-07-15	37	151	67	29.38	3TC+D4T30+NVP	1	1	0	0	2		1	2	2	1	2	2	0	751	0	96.47	74.4	3	2	9	2	0	0	0	0	0	0	2		0	0	2	0	1900-01-02	2	2	1	2014-07-01	351	3	2005-04-26
4100	0	2013-02-25	2013-03-01	34	155	51	21.23	EFV600+FTC+TDF	0	2	0	0	2		2	0	0	0	0	0	0	361	9999999	66.4	84.67	2	2	9	2	0	0	0	0	0	0	2		0	0	2	0	1900-01-02	2	2	1	2014-07-01	487	3	2013-02-25
4101	1	2013-02-25	2013-02-25	39	162	56	21.34	3TC+NVP+TDF	1	2	0	0	2		1	2	2	1	2	2	1	62	9999999	107.08	64.97	4	1	2	1	2	2	1	2	2	2	2		0	0	2	0	1900-01-02	2	2	1	2014-07-01	491	1	2013-02-25
4102	0	2013-02-26	2013-08-22	36	164	71	26.4	3TC+EFV600+TDF	0	2	0	0	2		2	0	0	0	0	0	1	941	9999999	84.07	91.34	1	1	9	2	0	0	0	0	0	0	2		0	0	2	0	1900-01-02	2	2	1	2014-07-01	313	3	2013-02-26
4103	1	2013-02-26	2013-07-09	36	168	55	19.49	EFV600+FTC+TDF	1	2	0	0	2		1	2	2	1	1	2	1	122	9999999	123.9	56.78	3	1	2	2	0	0	0	0	0	0	2		0	0	2	0	1900-01-02	2	2	1	2014-07-01	357	2	2013-02-26
4107	0	2013-03-04	2013-03-21	33	151	35	15.35	EFV600+FTC+TDF	0	2	0	0	2		1	2	2	1	2	2	0	115	9999999	57.5	67.74	4	2	9	1	2	2	1	2	2	2	2		0	0	2	0	1900-01-02	2	2	1	2014-07-01	467	2	2013-03-04
4108	1	2013-07-01	2013-07-15	35	163	60	22.58	3TC+EFV600+TDF	0	2	0	0	2		1	2	2	1	2	2	0	48	9999999	104.43	74.2	3	2	9	1	2	2	1	2	2	2	2		0	0	2	0	1900-01-02	2	2	1	2014-07-01	351	1	2013-07-01
4109	1	2013-03-05	2013-03-13	27	163	54	20.32	EFV600+FTC+TDF	0	2	0	0	2		1	2	2	1	2	2	0	7	9999999	99.1	75.74	2	2	9	2	0	0	0	0	0	0	2		0	0	2	0	1900-01-02	2	2	1	2014-07-01	475	1	2013-03-05
4110	1	2013-03-06	2013-03-20	35	165	59	21.67	EFV600+FTC+TDF	0	2	0	0	2		1	2	2	1	2	2	0	296	9999999	104.4	72.99	2	2	9	2	0	0	0	0	0	0	2		0	0	2	0	1900-01-02	2	2	1	2014-07-01	468	3	2013-03-06
4111	1	2013-03-06	2013-03-22	27	159	45	17.8	3TC+EFV600+TDF	0	2	0	0	1	Renal stone	1	2	2	1	2	2	0	37	9999999	85.8	72.9	4	2	9	1	2	2	1	2	2	2	2		0	1	2	0	1900-01-02	2	2	1	2014-07-01	466	1	2013-03-06
4113	1	2013-03-06	2013-12-19	33	160	73	28.52	3TC+EFV600+TDF	0	2	0	0	2		1	2	2	1	2	2	0	295	9999999	86.73	110.78	1	2	2	1	2	2	1	2	2	2	2		0	0	2	0	1900-01-02	2	2	1	2014-07-01	194	3	2013-03-06
4114	0	2013-03-06	2013-04-09	50	145	31	14.74	3TC+EFV600+TDF	0	2	0	0	2		1	2	2	1	1	2	0	110	9999999	51.3	56.56	4	2	9	1	2	2	1	2	2	2	2		0	0	1	1	2013-10-28	2	2	5	2013-10-28	202	2	2013-03-06
4115	1	2013-03-07	2013-03-21	33	158	47	18.83	3TC+D4T30+NVP	1	1	0	0	2		2	0	0	0	0	0	0	413	9999999	66.37	93.2	2	9	9	2	0	0	0	0	0	0	2		0	0	2	0	1900-01-02	2	2	1	2014-07-01	467	3	2013-03-07
4116	1	2013-03-07	2013-03-21	48	156	55	22.6	3TC+EFV600+TDF	0	2	0	1	2		1	2	2	1	2	2	1	349	9999999	67.3	92.48	3	1	2	2	0	0	0	0	0	0	2		1	0	2	0	1900-01-02	2	2	1	2014-07-01	467	3	2013-03-07
4118	1	2013-03-07	2013-10-16	31	163	49	18.44	3TC+EFV600+TDF	0	2	0	0	2		1	2	2	1	2	2	0	298	9999999	78.77	83.4	2	2	9	1	2	2	1	2	2	2	2		0	0	2	0	1900-01-02	2	2	1	2014-07-01	258	3	2013-03-06
4119	1	2013-03-08	2013-09-19	30	154	47	19.82	3TC+EFV600+TDF	0	2	0	0	2		1	2	2	1	2	2	0	230	9999999	100	63.59	3	2	9	1	2	2	1	2	2	2	2		0	0	2	0	1900-01-02	2	2	1	2014-07-01	285	3	2013-03-08
4120	1	2013-03-11	2013-04-05	39	167	52	18.65	3TC+EFV600+TDF	0	2	0	0	2		1	2	2	1	2	2	0	60	9999999	84.1	76.81	4	2	1	1	2	2	1	2	2	2	2		0	0	2	0	1900-01-02	2	2	1	2014-07-01	452	1	2013-03-11
4123	1	2013-03-11	2013-04-02	38	168	54	19.13	3TC+EFV600+TDF	0	2	0	0	2		1	2	2	1	2	2	1	63	9999999	106.2	63.79	3	1	2	1	2	2	1	2	2	2	2		0	0	2	0	1900-01-02	2	2	6	2014-06-23	447	1	2013-03-11
4125	0	2013-03-12	2013-12-12	35	157	71	28.8	3TC+EFV600+TDF	0	2	0	0	2		1	2	2	1	2	2	0	338	9999999	58.4	132.76	1	2	9	2	0	0	0	0	0	0	2		0	0	2	0	1900-01-02	2	2	1	2014-07-01	201	3	2013-03-12
4126	1	2013-03-12	2013-03-20	39	160	61	23.83	3TC+EFV600+TDF	0	2	0	0	2		1	2	2	1	2	2	0	35	9999999	114.2	66.36	3	2	9	1	2	2	1	2	2	2	2		0	0	2	0	1900-01-02	2	2	1	2014-07-01	468	1	2013-03-12
4127	1	2013-03-12	2013-03-28	33	165	43	15.79	3TC+EFV600+TDF	0	2	0	0	2		1	2	2	1	1	2	0	12	9999999	93.8	60.33	3	2	9	1	2	2	1	2	2	2	2		0	0	2	0	1900-01-02	2	2	1	2014-07-01	460	1	2013-03-12
4129	1	2013-03-12	2013-03-19	40	153	45	19.22	3TC+EFV600+TDF	0	2	0	0	2		1	2	2	1	2	2	0	147	9999999	99.1	55.85	2	2	9	1	2	2	1	2	2	2	2		0	0	2	0	1900-01-02	2	2	1	2014-07-01	469	2	2013-03-12
4130	0	2013-03-12	2013-03-19	26	157	52	21.1	3TC+EFV600+TDF	0	2	0	0	2		1	2	2	1	1	2	0	424	9999999	69.8	88.33	3	2	9	2	0	0	0	0	0	0	2		0	0	2	0	1900-01-02	2	2	1	2014-07-01	469	3	2013-03-12
4135	0	2013-03-15	2013-04-01	29	144	53	25.56	3TC+EFV600+TDF	0	2	0	0	2		1	2	2	1	2	2	0	259	9999999	86.7	70.57	1	2	9	2	0	0	0	0	0	0	2		0	0	2	0	1900-01-02	2	2	1	2014-07-01	456	3	2013-03-15
4137	1	2013-03-15	2013-03-27	53	154	46	19.4	3TC+EFV600+TDF	0	2	0	0	2		1	2	2	1	2	2	1	38	9999999	109.7	44.87	4	1	9	1	2	2	1	2	2	2	2		0	0	2	0	1900-01-02	2	2	6	2014-04-08	377	1	2013-03-15
4138	1	2013-03-15	2013-03-25	27	165	49	18	3TC+EFV600+TDF	0	2	0	0	2		1	2	2	1	2	2	0	6	9999999	73.5	92.66	4	2	2	1	2	2	1	2	2	2	2		0	0	2	0	1900-01-02	2	2	1	2014-07-01	463	1	2013-03-15
4139	1	2013-03-18	2013-03-25	44	157	47	19.07	3TC+EFV600+TDF	0	2	0	0	2		1	2	2	1	2	2	0	33	9999999	108.9	50.96	3	2	9	1	2	2	1	2	2	2	2		0	0	2	0	1900-01-02	2	2	1	2014-07-01	463	1	2013-03-18
4141	0	2013-03-18	2013-04-03	42	150	43	19.11	3TC+EFV600+TDF	0	2	0	0	2		1	2	2	1	2	2	0	95	9999999	62.8	69.79	4	2	2	1	2	2	1	2	2	2	2		0	0	2	0	1900-01-02	2	2	1	2014-07-01	454	1	2013-03-18
4143	0	2013-03-18	2013-07-16	30	152	36	15.58	3TC+EFV600+TDF	0	2	0	0	2		1	2	2	1	2	2	0	38	9999999	42.48	96.95	3	2	2	2	0	0	0	0	0	0	2		0	0	2	0	1900-01-02	2	2	6	2014-03-12	239	1	2013-03-18
4144	1	2013-03-19	2013-04-04	42	165	47	17.26	3TC+EFV600+TDF	0	2	0	0	2		1	2	2	1	2	2	1	43	9999999	107.7	52.6	4	1	9	1	2	2	1	2	2	2	2		0	0	2	0	1900-01-02	1	2	4	2013-10-28	207	1	2013-03-19
4145	0	2013-03-19	2013-04-22	44	154	47	19.82	3TC+EFV600+TDF	0	2	0	0	2		1	2	2	1	2	2	0	175	9999999	66.4	70.67	4	2	9	2	0	0	0	0	0	0	2		0	0	2	0	1900-01-02	2	2	1	2014-07-01	435	2	2013-03-19
4147	0	2013-03-20	2013-05-06	40	161	50	19.29	3TC+EFV600+TDF	0	2	0	0	1	increased serum creatinine	1	2	2	1	2	2	0	87	9999999	68.1	76.36	4	2	2	1	2	2	1	2	2	2	2		0	0	2	0	1900-01-02	2	2	1	2014-07-01	421	1	2013-03-20
4148	0	2013-03-21	2013-04-01	33	153	50	21.36	3TC+EFV600+TDF	0	2	0	0	2		1	2	2	1	2	2	0	184	9999999	102.7	54.18	3	2	2	2	0	0	0	0	0	0	2		0	0	2	0	1900-01-02	2	2	1	2014-07-01	456	2	2013-03-21
4149	0	2013-03-29	2013-04-25	58	157	42	17.04	3TC+EFV600+TDF	0	2	0	0	2		1	2	2	1	2	2	0	19	9999999	68.1	52.6	4	2	9	1	2	2	1	2	2	2	2		0	0	2	0	1900-01-02	2	2	1	2014-07-01	432	1	2013-03-29
4151	0	2013-03-25	2013-04-08	33	163	47	17.69	3TC+EFV600+TDF	0	2	0	0	2		1	2	2	1	1	2	0	58	9999999	74.3	70.39	4	2	2	2	0	0	0	0	0	0	2		0	0	2	0	1900-01-02	2	2	6	2014-04-10	367	1	2013-03-25
4152	1	2013-03-25	2013-11-22	42	157	55	22.31	3TC+EFV600+TDF	0	2	0	0	2		1	2	2	1	2	2	0	164	9999999	109.74	60.41	1	2	9	1	2	2	1	2	2	2	2		0	0	2	0	1900-01-02	2	2	2	2014-02-26	96	2	2013-03-25
4154	1	2013-03-27	2013-04-09	48	166	61	22.14	3TC+EFV600+TDF	0	2	0	0	2		1	2	2	1	2	2	0	31	9999999	108.85	63.42	3	2	9	1	2	2	1	2	2	2	2		0	0	2	0	1900-01-02	2	2	1	2014-07-01	448	1	2013-03-27
4155	0	2013-03-27	2013-04-23	25	150	35	15.56	3TC+EFV600+TDF	0	2	0	0	2		1	2	2	1	2	2	0	53	9999999	50.7	82.56	4	2	9	1	2	2	1	2	2	2	2		0	0	2	0	1900-01-02	1	2	4	2013-05-21	28	1	2013-03-27
4157	0	2013-03-27	2013-04-22	36	146	40	18.77	3TC+EFV600+TDF	0	2	0	0	2		1	2	2	1	2	2	0	79	9999999	65.5	66.05	4	2	9	2	0	0	0	0	0	0	2		0	0	2	0	1900-01-02	2	2	1	2014-07-01	435	1	2013-03-27
4158	0	2013-03-27	2013-11-26	30	154	49	20.66	3TC+EFV600+TDF	0	2	0	0	2		2	0	0	0	0	0	1	508	9999999	84.96	65.98	2	1	9	2	0	0	0	0	0	0	2		0	0	2	0	1900-01-02	2	2	1	2014-07-01	217	3	2013-03-27
4159	1	2013-03-28	2013-04-23	34	160	42	16.41	3TC+EFV600+TDF	0	2	0	0	2		1	2	2	1	2	2	0	121	9999999	92	59.52	3	2	9	2	0	0	0	0	0	0	2		0	0	2	0	1900-01-02	2	2	1	2014-07-01	434	2	2013-03-28
416	0	2005-04-26	2012-02-28	40	150	41	18.22	3TC+D4T30+NVP	1	1	0	0	2		1	2	2	1	2	2	0	1051	0	999	999	3	2	9	2	0	0	0	0	0	0	2		0	0	2	0	1900-01-02	2	2	1	2014-07-01	854	3	2005-04-24
4160	0	2013-03-28	2013-04-22	26	149	33	14.86	3TC+EFV600+TDF	0	2	0	0	2		1	2	2	1	2	2	0	20	9999999	54.9	71.27	3	2	9	1	2	2	1	2	2	2	2		0	0	2	0	1900-01-02	2	2	2	2013-10-29	190	1	2013-03-28
4162	1	2013-03-28	2013-06-03	48	157	44	17.85	3TC+AZT+NVP	1	2	0	0	2		1	2	2	1	2	2	1	122	9999999	88.5	56.26	3	1	9	1	2	2	1	2	2	2	2		0	0	2	0	1900-01-02	2	2	1	2014-07-01	393	2	2013-03-28
4163	1	2013-03-29	2013-04-05	30	171	61	20.86	3TC+EFV600+TDF	0	2	0	0	2		1	2	2	1	2	2	0	199	9999999	105.31	78.37	3	2	9	1	2	2	1	2	2	2	2		0	0	2	0	1900-01-02	2	2	1	2014-07-01	452	2	2013-03-29
4164	0	2013-04-01	2013-04-29	31	153	43	18.37	3TC+EFV600+TDF	0	2	0	0	1	Bilateral Nephropathz	1	2	2	1	2	2	0	30	9999999	58.4	83.47	4	2	9	1	2	2	1	2	2	2	2		0	0	2	0	1900-01-02	2	1	3	2014-04-07	343	1	2013-04-01
4165	0	2013-04-02	2013-04-10	18	152	47	20.34	3TC+EFV600+TDF	0	2	0	0	2		1	2	2	1	2	2	0	328	9999999	63.7	93.62	3	2	9	2	0	0	0	0	0	0	2		0	0	2	0	1900-01-02	2	2	1	2014-07-01	447	3	2013-04-02
4168	0	2013-04-03	2013-04-26	48	156	41	16.85	3TC+EFV600+TDF	0	2	0	0	2		1	2	2	1	2	2	0	37	9999999	60.2	65.16	4	2	9	1	2	2	1	2	2	2	2		0	0	2	0	1900-01-02	1	2	4	2013-07-23	88	1	2013-04-03
4170	1	2013-04-03	2013-04-26	32	169	46	16.11	3TC+EFV600+TDF	0	2	0	0	2		1	2	2	1	2	2	0	5	9999999	62	98.56	4	2	9	1	2	2	1	2	2	2	2		0	0	2	0	1900-01-02	1	2	4	2013-04-26	0	1	2013-04-03
4172	1	2013-04-05	2013-04-26	35	160	46	17.97	3TC+EFV600+TDF	0	2	0	0	2		1	2	2	1	2	2	0	42	9999999	68.1	87.24	3	2	9	1	2	2	1	1	2	2	2		0	0	2	0	1900-01-02	2	2	1	2014-07-01	431	1	2013-04-05
4175	0	2013-04-08	2013-04-22	32	154	40	16.87	3TC+EFV600+TDF	0	2	0	0	2		1	2	2	1	2	2	0	272	9999999	68.2	65.88	1	2	2	1	2	2	1	2	2	2	2		0	0	2	0	1900-01-02	2	2	1	2014-07-01	435	3	2013-04-08
4176	1	2013-04-08	2013-04-23	31	166	46	16.69	3TC+EFV600+TDF	0	2	0	0	2		1	2	2	1	2	2	0	17	9999999	123.1	50.1	4	2	9	1	2	2	1	2	2	2	2		0	0	2	0	1900-01-02	2	2	1	2014-07-01	434	1	2013-04-08
4178	1	2013-04-09	2013-10-21	51	159	47	18.59	3TC+EFV600+TDF	0	2	0	0	2		1	2	2	1	2	2	0	230	9999999	98.24	52.37	1	2	9	2	0	0	0	0	0	0	2		0	0	2	0	1900-01-02	2	2	1	2014-07-01	253	3	2013-04-09
4179	0	2013-04-09	2013-05-14	45	159	47	18.59	3TC+AZT+NVP	1	2	0	0	2		1	2	2	1	2	2	0	9999	9999999	83.19	55.82	4	2	9	1	2	2	1	2	2	2	2		0	0	2	0	1900-01-02	2	2	1	2014-07-01	413	3	2013-04-09
4182	0	2013-04-10	2013-04-26	30	151	38	16.67	3TC+EFV600+TDF	0	2	0	0	2		1	2	2	1	2	2	1	115	9999999	67.3	64.59	3	1	2	1	2	2	1	2	2	2	2		0	0	2	0	1900-01-02	2	2	1	2014-07-01	431	2	2013-04-10
4184	1	2013-04-11	2013-04-29	35	161	49	18.9	3TC+EFV600+TDF	0	2	0	0	2		1	2	2	1	2	2	0	14	9999999	108.85	58.14	3	2	9	1	2	2	1	1	2	2	2		0	0	2	0	1900-01-02	2	2	1	2014-07-01	428	1	2013-04-11
4185	0	2013-04-22	2013-10-22	26	155	59	24.56	3TC+EFV600+TDF	0	2	0	0	2		1	2	2	1	2	2	0	198	9999999	44.25	158.08	2	2	9	1	2	2	1	1	2	2	2		0	0	2	0	1900-01-02	2	2	1	2014-07-01	252	2	2013-04-22
4186	1	2013-04-22	2013-04-29	28	167	53	19	3TC+EFV600+TDF	0	2	0	0	2		1	2	2	1	2	2	0	26	9999999	75.9	96.2	3	2	9	1	2	2	1	2	2	2	2		0	0	2	0	1900-01-02	2	2	1	2014-07-01	428	1	2013-04-22
4187	0	2013-04-22	2013-05-10	28	142	35	17.36	3TC+EFV600+TDF	0	2	0	0	2		1	2	2	1	1	2	0	36	9999999	67.2	60.67	4	2	9	1	2	2	1	2	2	2	2		0	0	2	0	1900-01-02	2	2	2	2014-05-22	377	1	2013-04-22
4188	1	2013-04-22	2013-04-29	41	162	53	20.2	3TC+EFV600+TDF	0	2	0	0	2		1	2	2	1	2	2	0	23	9999999	90.3	71.47	4	2	1	1	2	2	1	2	2	2	2		0	1	2	0	1900-01-02	2	2	1	2014-07-01	428	1	2013-04-22
4189	0	2013-04-22	2013-05-23	45	152	49	21.21	3TC+EFV600+TDF	0	2	0	0	2		1	2	2	1	2	2	0	33	9999999	93.8	51.61	4	2	9	1	2	2	1	2	2	2	2		0	0	2	0	1900-01-02	1	2	4	2014-05-25	367	1	2013-04-22
419	1	2005-04-27	2012-12-27	40	157	61	24.75	3TC+D4T30+NVP	1	1	0	0	2		1	2	2	1	2	2	9	171	0	999	999	3	9	9	1	2	2	1	2	2	2	2		0	0	2	0	1900-01-02	1	2	4	2013-07-17	202	2	2005-04-26
4190	1	2013-04-22	2013-07-05	42	161	63	24.3	3TC+EFV600+TDF	0	2	0	0	2		1	2	2	1	2	2	0	575	9999999	115.05	66.01	3	2	2	2	0	0	0	0	0	0	2		0	0	2	0	1900-01-02	2	2	1	2014-07-01	361	3	2013-04-22
4195	1	2013-04-22	2013-03-26	26	150	48	21.33	TDF/3TC/EFV	1	2	0	0	2		2	0	0	0	0	0	0	592	9999999	999	999	1	2	9	2	0	0	0	0	0	0	2		0	0	2	0	1900-01-02	2	2	1	2014-07-01	462	3	2013-04-22
4196	1	2013-04-23	2013-05-17	44	161	44	16.97	3TC+EFV600+TDF	0	2	0	0	2		1	2	2	1	2	2	0	185	9999999	100	51.96	4	2	9	1	2	2	1	1	2	2	2		0	0	2	0	1900-01-02	2	2	1	2014-07-01	410	2	2013-04-23
4199	1	2013-04-24	2013-05-14	40	166	44	15.97	3TC+EFV600+TDF	0	2	0	0	2		1	2	2	1	2	2	0	20	9999999	74.34	72.8	4	2	9	1	2	2	1	1	2	2	2		0	0	2	0	1900-01-02	1	2	4	2014-02-25	287	1	2013-04-24
4200	1	2013-04-24	2013-05-28	25	168	60	21.26	3TC+EFV600+TDF	0	2	0	0	2		1	2	2	1	2	2	0	172	9999999	108.8	78.01	1	2	9	2	0	0	0	0	0	0	2		0	0	2	0	1900-01-02	2	2	1	2014-07-01	399	2	2013-04-24
4201	1	2013-04-24	2013-05-21	28	162	48	18.29	3TC+EFV600+TDF	0	2	0	0	2		1	2	2	1	2	2	0	33	9999999	56.6	116.83	4	2	2	2	0	0	0	0	0	0	2		0	0	2	0	1900-01-02	2	2	1	2014-07-01	406	1	2013-04-24
4202	1	2013-04-29	2013-05-16	30	161	42	16.2	3TC+EFV600+TDF	0	2	0	0	2		1	2	2	1	2	2	0	247	9999999	69.9	81.3	4	2	9	1	2	2	1	2	2	2	2		0	0	2	0	1900-01-02	2	2	1	2014-07-01	411	3	2013-04-29
4204	0	2013-04-29	2013-05-08	52	156	53	21.78	3TC+EFV600+TDF	0	2	0	0	2		1	2	2	1	2	2	0	244	9999999	94.7	51.22	1	2	1	2	0	0	0	0	0	0	2		0	0	2	0	1900-01-02	2	2	1	2014-07-01	419	3	2013-04-29
4206	1	2013-04-29	2013-05-06	33	166	53	19.23	3TC+EFV600+TDF	0	2	0	0	2		1	2	2	1	2	2	1	250	9999999	124.8	55.89	3	1	9	2	0	0	0	0	0	0	2		0	0	2	0	1900-01-02	2	2	6	2014-05-02	361	3	2013-04-29
4209	0	2013-04-30	2013-10-03	32	154	54	22.77	3TC+EFV600+TDF	0	2	0	0	2		1	2	2	1	2	2	0	270	9999999	81.42	74.49	2	2	2	1	2	2	1	2	2	2	2		0	0	2	0	1900-01-02	2	2	1	2014-07-01	271	3	2013-04-30
4210	1	2013-05-02	2013-05-10	21	160	42	16.41	3TC+EFV600+TDF	0	2	0	0	2		1	2	2	1	2	2	0	33	9999999	127.44	48.24	3	2	2	1	2	2	1	2	2	2	2		0	0	2	0	1900-01-02	2	2	1	2014-07-01	417	1	2013-05-02
4212	1	2013-05-02	2013-05-13	32	156	52	21.37	3TC+EFV600+TDF	0	2	0	0	2		1	2	2	1	2	2	0	48	9999999	107.97	63.98	3	2	2	1	2	2	1	2	2	2	2		0	0	2	0	1900-01-02	2	2	1	2014-07-01	414	1	2013-05-02
4213	0	2013-05-02	2013-11-15	28	161	57	21.99	3TC+EFV600+TDF	0	2	0	0	2		1	2	2	1	2	2	0	301	9999999	77.88	85.25	2	2	9	1	2	2	1	2	2	2	2		0	0	2	0	1900-01-02	2	2	1	2014-07-01	228	3	2013-05-02
4215	1	2013-05-02	2013-05-14	35	168	43	15.24	3TC+EFV600+TDF	0	2	0	0	2		1	2	2	1	2	2	1	63	9999999	53.1	104.58	4	1	9	1	2	2	1	2	2	2	2		0	0	2	0	1900-01-02	2	2	1	2014-07-01	413	1	2013-05-02
4217	1	2013-05-02	2013-05-30	29	167	47	16.85	3TC+EFV600+TDF	0	2	0	0	2		1	2	2	1	1	2	1	12	9999999	118.59	54.11	4	1	9	1	2	2	1	2	2	2	2		0	0	2	0	2013-07-03	1	1	4	2013-07-03	34	1	2013-05-02
4218	0	2013-05-03	2013-05-07	32	159	57	22.55	3TC+EFV600+TDF	0	2	0	0	2		1	2	2	1	2	2	0	28	9999999	97.3	65.8	3	2	9	1	2	2	1	2	2	2	2		0	0	2	0	1900-01-02	2	2	1	2014-07-01	420	1	2013-05-02
4219	1	2013-05-03	2013-05-13	36	177	65	20.75	3TC+EFV600+TDF	0	2	0	0	2		1	2	2	1	2	2	0	259	9999999	121.25	68.58	1	2	9	1	2	2	1	2	2	2	2		0	0	2	0	1900-01-02	2	2	1	2014-07-01	414	3	2013-05-03
4221	0	2013-05-06	2013-07-15	43	149	47	21.17	3TC+AZT+NVP	1	1	0	0	2		1	2	2	1	2	2	0	54	9999999	61.1	77.6	3	2	9	1	2	2	1	2	2	2	2		0	0	2	0	1900-01-02	2	1	3	2014-05-12	301	1	2013-05-06
4222	0	2013-05-07	2013-05-13	31	155	50	20.81	3TC+EFV600+TDF	0	2	0	0	2		1	2	2	1	2	2	0	22	9999999	64.61	87.73	3	2	9	1	2	2	1	2	2	2	2		0	0	2	0	1900-01-02	2	2	1	2014-07-01	414	1	2013-05-07
4223	1	2013-05-08	2013-11-25	40	168	61	21.61	3TC+D4T30+EFV600	1	1	0	0	2		1	2	2	1	1	2	1	135	9999999	135.4	55.41	4	1	9	1	2	2	1	2	2	1	2		0	0	2	0	1900-01-02	2	2	1	2014-07-01	218	2	2013-05-08
4225	1	2013-05-08	2013-06-05	32	165	44	16.16	3TC+AZT+NVP	1	2	0	0	2		1	2	2	1	2	2	0	101	9999999	111.51	52.42	3	9	9	1	2	2	1	2	2	2	2		0	0	2	0	1900-01-02	1	2	4	2013-07-25	50	2	2013-05-08
4226	1	2013-05-09	2013-05-13	31	160	54	21.09	3TC+EFV600+TDF	0	2	0	0	2		1	2	2	1	2	2	0	82	9999999	96.5	75.02	4	2	9	1	2	2	1	2	2	2	2		0	0	2	0	1900-01-02	2	2	1	2014-07-01	414	1	2013-05-09
4228	0	2013-05-09	2013-05-20	31	156	57	23.42	3TC+EFV600+TDF	0	2	0	0	2		1	2	2	1	2	2	0	291	9999999	95.5	67.66	2	2	9	1	2	2	1	2	2	2	2		0	0	2	0	1900-01-02	2	2	2	2013-11-21	185	3	2013-05-09
4229	1	2013-05-09	2013-05-16	27	164	41	15.24	3TC+EFV600+TDF	0	2	0	0	2		1	2	2	1	2	2	1	38	9999999	83.2	68.49	3	1	9	1	2	2	1	2	2	2	2		0	0	2	0	1900-01-02	2	1	3	2013-06-18	33	1	2013-05-09
4230	1	2013-05-09	2013-05-28	23	169	39	13.65	3TC+EFV600+TDF	0	2	0	0	2		1	2	2	1	2	2	0	131	9999999	95.5	58.77	4	2	9	1	2	2	1	2	2	2	2		0	0	2	0	1900-01-02	1	2	4	2013-09-17	112	2	2013-05-09
4232	1	2013-05-13	2013-05-23	54	164	42	15.62	3TC+EFV600+TDF	0	2	0	0	2		1	2	2	1	2	2	0	19	9999999	86.7	51.24	3	2	9	1	2	2	1	2	2	2	2		0	0	2	0	1900-01-02	2	2	1	2014-07-01	404	1	2013-05-13
4233	1	2013-05-14	2013-05-27	43	169	56	19.61	3TC+EFV600+TDF	0	2	0	0	2		1	2	2	1	2	2	0	294	9999999	101.78	65.65	3	2	9	2	0	0	0	0	0	0	2		0	0	2	0	1900-01-02	2	2	1	2014-07-01	400	3	2013-05-14
4234	1	2013-05-14	2013-07-15	39	159	53	20.96	3TC+EFV600+TDF	0	2	0	0	2		1	2	2	1	2	2	0	505	9999999	111.5	59.05	3	2	2	2	0	0	0	0	0	0	2		0	1	2	0	1900-01-02	2	2	1	2014-07-01	351	3	2013-05-14
4235	0	2013-05-14	2013-05-20	27	162	52	19.81	3TC+EFV600+TDF	0	2	0	0	2		1	2	2	1	2	2	0	339	9999999	76.9	79.47	2	2	9	2	0	0	0	0	0	0	2		0	0	2	0	1900-01-02	2	2	1	2014-07-01	407	3	2013-05-14
4236	1	2013-05-14	2013-05-20	27	171	68	23.26	3TC+EFV600+TDF	0	2	0	0	2		1	2	2	1	2	2	0	281	9999999	92.04	102.69	3	2	9	2	0	0	0	0	0	0	2		0	0	2	0	1900-01-02	2	2	1	2014-07-01	407	3	2013-05-14
424	0	2005-05-02	2012-09-27	32	152	55	23.81	3TC+D4T30+NVP	1	1	0	0	9		1	2	2	1	2	2	0	562	0	102.66	60.18	4	2	9	2	0	0	0	0	0	0	2		0	0	2	0	1900-01-02	2	2	1	2014-07-01	642	3	2005-04-26
4240	1	2013-05-17	2013-05-27	42	173	63	21.05	3TC+EFV600+TDF	0	1	0	0	2		1	2	2	1	2	2	0	319	9999999	98.2	77.33	2	2	9	2	0	0	0	0	0	0	2		0	0	2	0	1900-01-02	2	2	1	2014-07-01	400	3	2013-05-17
4241	0	2013-05-20	2013-09-02	38	152	53	22.94	3TC+EFV600+TDF	0	2	0	0	2		2	0	0	0	0	0	1	341	9999999	85.85	65.49	1	1	9	2	0	0	0	0	0	0	2		0	0	2	0	1900-01-02	2	2	1	2014-07-01	302	3	2013-05-20
4242	1	2013-05-20	2013-05-27	27	170	48	16.61	3TC+EFV600+TDF	0	2	0	0	2		1	2	2	1	2	2	1	15	9999999	93.81	71.12	4	1	9	1	2	2	1	2	2	2	2		0	0	2	0	1900-01-02	1	2	4	2013-06-11	15	1	2013-05-20
4246	1	2013-05-21	2013-06-07	31	163	51	19.2	3TC+EFV600+TDF	0	2	0	0	2		1	2	2	1	2	2	0	119	9999999	116.8	58.54	3	2	9	1	2	2	1	2	2	2	2		0	0	2	0	1900-01-02	2	2	1	2014-07-01	389	2	2013-05-21
4247	1	2013-05-22	2013-05-31	35	159	48	18.99	3TC+EFV600+TDF	0	2	0	0	2		1	2	2	1	2	2	0	11	9999999	104.4	59.38	4	2	9	1	2	2	1	2	2	2	2		0	0	2	0	1900-01-02	2	2	6	2014-05-22	356	1	2013-05-22
4250	0	2013-05-23	2013-06-13	47	157	39	15.82	3TC+EFV600+TDF	0	2	0	0	2		1	2	2	1	2	2	0	68	9999999	61.06	61.78	4	2	2	2	0	0	0	0	0	0	2		0	0	2	0	1900-01-02	2	2	1	2014-07-01	383	1	2013-05-23
4251	0	2013-05-23	2013-06-10	35	159	43	17.01	3TC+EFV600+TDF	0	2	0	0	2		1	2	2	1	2	2	0	45	9999999	999	999	4	2	9	1	2	2	1	2	2	2	2		0	0	2	0	1900-01-02	1	2	4	2013-09-23	105	1	2013-05-23
4252	1	2013-05-23	2013-06-03	42	160	55	21.48	3TC+EFV600+TDF	0	2	0	0	2		1	2	2	1	2	2	0	52	9999999	104.43	63.48	3	2	2	1	2	2	1	2	2	2	2		0	0	2	0	1900-01-02	2	2	1	2014-07-01	393	1	2013-05-23
4253	1	2013-05-23	2013-06-07	33	171	55	18.81	3TC+EFV600+TDF	0	2	0	0	2		1	2	2	1	2	2	0	24	9999999	102.66	70.51	3	2	2	1	2	2	1	2	2	2	2		0	0	2	0	1900-01-02	2	2	1	2014-07-01	389	1	2013-05-23
4254	0	2013-05-23	2013-05-30	28	158	55	22.03	3TC+EFV600+TDF	0	2	0	0	2		2	0	0	0	0	0	0	832	9999999	60.18	106.45	1	2	9	2	0	0	0	0	0	0	2		0	0	2	0	1900-01-02	2	2	1	2014-07-01	397	3	2013-05-23
4256	1	2013-05-27	2013-06-07	34	157	49	19.88	3TC+EFV600+TDF	0	2	0	0	2		1	2	2	1	2	2	0	55	9999999	95.58	66.84	3	2	2	1	2	2	1	2	2	2	2		0	0	2	0	1900-01-02	2	2	1	2014-07-01	389	1	2013-05-27
4258	1	2013-05-27	2013-06-04	31	159	55	21.76	3TC+EFV600+TDF	0	2	0	0	2		1	2	2	1	2	2	1	16	9999999	70.01	105.33	3	1	9	1	2	2	1	2	2	2	2		0	0	2	0	1900-01-02	2	2	1	2014-07-01	392	1	2013-05-27
4259	1	2013-05-27	2013-06-12	31	157	44	17.85	3TC+EFV600+TDF	0	2	0	0	2		1	2	2	1	2	2	0	20	9999999	114.17	51.67	4	2	9	1	2	2	1	2	2	2	2		0	0	2	0	1900-01-02	2	2	1	2014-07-01	384	1	2013-05-27
4260	1	2013-05-27	2013-06-03	42	164	60	22.31	3TC+EFV600+TDF	0	2	0	0	2		1	2	2	1	2	2	0	285	9999999	104.43	69.26	3	2	9	2	0	0	0	0	0	0	2		0	0	2	0	1900-01-02	2	2	1	2014-07-01	393	3	2013-05-27
4261	1	2013-05-27	2013-06-13	41	169	45	15.76	3TC+EFV600+TDF	0	2	0	0	2		1	2	2	1	2	2	0	20	9999999	75.22	72.85	4	2	9	1	2	2	1	2	2	2	2		0	0	2	0	2013-07-24	1	1	4	2013-07-24	41	1	2013-05-27
4262	0	2013-05-28	2013-06-13	25	151	57	25	3TC+EFV600+TDF	0	2	0	0	2		1	2	2	1	2	2	0	333	9999999	92.93	73.36	1	2	9	2	0	0	0	0	0	0	2		0	0	2	0	1900-01-02	2	2	1	2014-07-01	383	3	2013-05-28
4263	1	2013-05-28	2013-06-10	24	157	44	17.85	3TC+EFV600+TDF	0	2	0	0	2		1	2	2	1	2	2	1	170	9999999	69.03	90.94	2	1	9	1	2	2	1	2	2	2	2		0	0	2	0	1900-01-02	2	2	1	2014-07-01	386	2	2013-05-28
4266	1	2013-05-28	2013-06-13	67	157	53	21.5	3TC+EFV600+TDF	0	2	1	0	2		1	2	2	1	2	2	0	49	9999999	74.34	64.01	2	2	9	2	0	0	0	0	0	0	2		0	1	2	0	1900-01-02	2	2	6	2014-06-04	356	1	2013-05-28
4268	1	2013-05-28	2013-09-04	40	157	50	20.28	3TC+EFV600+TDF	0	2	0	0	2		1	2	2	1	2	2	1	227	9999999	115.93	53.05	3	1	9	2	0	0	0	0	0	0	2		0	0	2	0	1900-01-02	2	2	1	2014-07-01	300	3	2013-05-28
4269	0	2013-05-29	2013-09-23	49	153	56	23.92	3TC+EFV600+TDF	0	2	0	0	2		1	2	2	1	2	2	0	338	9999999	50.44	105.07	2	2	9	2	0	0	0	0	0	0	2		0	0	2	0	1900-01-02	2	2	1	2014-07-01	281	3	2013-05-29
4272	1	2013-05-31	2013-07-15	39	160	67	26.17	3TC+EFV600+TDF	0	2	0	0	2		1	2	2	1	1	2	0	430	9999999	100.89	82.5	3	2	9	2	0	0	0	0	0	0	2		0	0	2	0	1900-01-02	2	2	1	2014-07-01	351	3	2013-05-31
4273	0	2013-05-31	2013-06-13	30	157	66	26.78	3TC+EFV600+TDF	0	2	0	0	2		1	2	2	1	2	2	1	28	9999999	83.19	90.76	3	1	9	1	2	2	1	2	2	2	2		0	0	2	0	1900-01-02	2	2	1	2014-07-01	383	1	2013-05-31
4274	1	2013-06-03	2013-07-23	49	166	50	18.14	3TC+EFV600+TDF	0	2	0	0	2		2	0	0	0	0	0	0	14	9999999	52.99	105.61	4	2	2	2	0	0	0	0	0	0	2		0	0	1	2	2014-05-08	2	2	5	2014-05-08	289	1	2013-06-03
4277	0	2013-06-03	2013-06-26	53	157	64	25.96	3TC+EFV600+TDF	0	2	0	0	2		1	2	2	1	2	2	0	231	9999999	93.81	61.73	1	2	2	1	2	2	1	2	2	1	2		0	0	2	0	1900-01-02	2	2	1	2014-07-01	370	3	2013-06-03
4278	1	2013-06-04	2013-09-09	26	162	54	20.58	3TC+EFV600+TDF	0	2	0	0	2		2	0	0	0	0	0	0	325	9999999	109.74	69	2	2	2	2	0	0	0	0	0	0	2		0	0	2	0	1900-01-02	2	2	1	2014-07-01	295	3	2013-06-04
4279	1	2013-06-04	2013-06-12	30	152	51	22.07	3TC+EFV600+TDF	0	2	0	0	2		1	2	2	1	2	2	0	681	9999999	111.51	61.88	3	2	2	2	0	0	0	0	0	0	2		0	0	2	0	1900-01-02	2	2	1	2014-07-01	384	3	2013-06-04
4280	1	2013-06-04	2013-06-18	37	164	58	21.56	3TC+EFV600+TDF	0	2	0	0	2		1	2	2	1	2	2	0	291	9999999	92.92	79.08	1	2	2	2	0	0	0	0	0	0	2		0	0	2	0	1900-01-02	2	2	1	2014-07-01	378	3	2013-06-04
4281	0	2013-06-05	2013-07-03	36	157	32	12.98	3TC+EFV600+TDF	0	2	0	0	2		1	2	2	1	2	2	0	15	9999999	51.33	67.43	4	2	9	1	2	2	1	2	2	2	2		0	0	2	0	1900-01-02	1	2	4	2013-07-21	18	1	2013-06-05
4282	0	2013-06-06	2013-07-11	44	150	34	15.11	3TC+AZT+NVP	1	2	0	0	2		1	2	2	1	2	2	0	9999	9999999	64.49	52.64	4	2	9	1	2	2	1	2	2	2	2		0	0	2	0	1900-01-02	1	2	4	2013-07-16	5	3	2013-06-06
4283	1	2013-06-06	2013-06-14	34	158	47	18.83	3TC+EFV600+TDF	0	2	0	0	2		1	2	2	1	2	2	0	58	9999999	114.17	53.67	4	2	1	1	2	2	1	2	2	2	2		0	0	2	0	1900-01-02	2	2	1	2014-07-01	382	1	2013-06-06
4285	1	2013-06-10	2013-09-16	26	152	47	20.34	3TC+EFV600+TDF	0	2	0	0	2		1	2	2	1	2	2	0	311	9999999	89.39	73.73	2	2	9	2	0	0	0	0	0	0	2		0	0	2	0	1900-01-02	2	2	1	2014-07-01	288	3	2013-06-10
4287	1	2013-06-10	2013-06-20	33	158	53	21.23	3TC+EFV600+TDF	0	2	0	0	2		1	2	2	1	2	2	0	308	9999999	124.79	55.9	2	2	9	1	2	2	1	2	2	2	2		0	0	2	0	1900-01-02	2	2	1	2014-07-01	376	3	2013-06-10
4289	1	2013-06-11	2013-06-27	32	153	58	24.78	3TC+EFV600+TDF	0	2	0	0	2		1	2	2	1	2	2	1	291	9999999	110.62	69.65	1	1	2	1	2	2	1	2	2	2	2		0	0	2	0	1900-01-02	2	2	1	2014-07-01	369	3	2013-06-11
4292	1	2013-06-12	2013-07-01	48	164	57	21.19	3TC+EFV600+TDF	0	2	0	0	2		1	2	2	1	2	2	0	56	9999999	79.7	80.93	3	2	2	1	2	2	1	2	2	2	2		0	0	2	0	1900-01-02	2	2	1	2014-07-01	365	1	2013-06-12
4293	0	2013-06-12	2013-06-25	24	154	46	19.4	3TC+EFV600+TDF	0	2	0	0	2		1	2	2	1	2	2	0	407	9999999	76.11	72.91	3	2	9	1	2	2	1	2	2	2	2		0	0	2	0	1900-01-02	2	1	3	2013-10-24	121	3	2013-06-12
4294	1	2013-06-12	2013-06-24	42	159	47	18.59	3TC+EFV600+TDF	0	2	0	0	2		1	2	2	1	2	2	0	133	9999999	99.12	57.16	3	2	2	2	0	0	0	0	0	0	2		0	0	2	0	1900-01-02	2	2	1	2014-07-01	372	2	2013-06-12
4295	0	2013-06-13	2013-06-25	37	157	63	25.56	3TC+EFV600+TDF	0	2	0	0	2		1	2	2	1	2	2	0	79	9999999	129.2	52.23	3	2	2	2	0	0	0	0	0	0	2		0	0	2	0	1900-01-02	2	2	1	2014-07-01	371	1	2013-06-13
4296	1	2013-06-13	2012-02-01	37	159	53	20.96	TDF/3TC/EFV	0	2	0	0	2		1	2	2	1	2	2	1	72	9999999	999	999	3	1	2	1	2	2	1	2	2	2	2		0	0	2	0	1900-01-02	2	2	1	2014-07-01	881	1	2013-06-13
4297	1	2013-06-14	2013-06-24	37	158	53	21.23	3TC+EFV600+TDF	0	2	0	0	2		1	2	2	1	2	2	0	97	9999999	107.08	62.71	2	2	2	1	2	2	1	2	2	2	2		0	0	2	0	1900-01-02	2	2	1	2014-07-01	372	1	2013-06-14
4298	1	2013-06-14	2013-06-24	47	159	67	26.5	3TC+EFV600+TDF	0	2	0	0	2		1	2	2	1	2	2	0	104	9999999	119.47	64.15	3	2	1	1	2	2	1	2	2	2	2		0	1	2	0	1900-01-02	2	2	1	2014-07-01	372	2	2013-06-14
4299	0	2013-06-18	2013-07-04	39	153	50	21.36	3TC+EFV600+TDF	0	2	0	0	2		1	2	2	1	2	2	1	173	9999999	78.76	66.68	4	1	9	1	2	2	1	2	2	2	2		0	0	2	0	1900-01-02	2	2	1	2014-07-01	362	2	2013-06-18
430	0	2005-05-03	2012-08-23	34	155	65	27.06	3TC+D4T30+NVP	1	1	0	0	2		1	2	2	1	2	2	9	979	0	79.95	89.63	2	9	9	2	0	0	0	0	0	0	2		0	0	2	0	1900-01-02	2	2	1	2014-07-01	677	3	2005-04-20
4302	0	2013-06-18	2013-06-24	35	161	39	15.05	3TC+EFV600+TDF	0	2	0	0	2		1	2	2	1	2	2	0	110	9999999	48.67	87.5	4	2	2	1	2	2	1	2	2	2	2		0	0	2	0	1900-01-02	2	2	1	2014-07-01	372	2	2013-06-18
4304	1	2013-06-19	2013-07-01	35	157	55	22.31	3TC+EFV600+TDF	0	2	0	0	2		1	2	2	1	2	2	0	192	9999999	89.39	79.46	1	2	9	1	2	2	1	2	2	2	2		0	0	2	0	1900-01-02	2	2	1	2014-07-01	365	2	2013-06-19
4305	0	2013-06-19	2013-09-20	42	149	55	24.77	3TC+EFV600+TDF	0	2	0	0	2		1	2	2	1	2	2	0	198	9999999	54.6	102.67	2	2	9	2	0	0	0	0	0	0	2		0	0	2	0	1900-01-02	2	2	1	2014-07-01	284	2	2013-06-19
4306	0	2013-06-19	2013-07-01	29	148	37	16.89	3TC+EFV600+TDF	0	2	0	0	2		1	2	2	1	2	2	0	35	9999999	54.87	77.84	4	2	2	1	2	2	1	2	2	2	2		0	0	2	0	1900-01-02	2	2	1	2014-07-01	365	1	2013-06-19
4308	1	2013-06-20	2013-07-03	33	158	50	20.03	3TC+EFV600+TDF	0	2	0	0	2		1	2	2	1	2	2	0	18	9999999	82.31	79.95	4	9	9	1	2	2	1	2	2	2	2		0	0	2	0	1900-01-02	2	2	1	2014-07-01	363	1	2013-06-20
4309	1	2013-06-24	2013-07-04	38	162	53	20.2	3TC+EFV600+TDF	0	2	0	0	2		1	2	2	1	2	2	1	14	9999999	87.61	75.9	4	1	9	1	2	2	1	2	2	2	2		0	0	2	0	1900-01-02	2	2	1	2014-07-01	362	1	2013-06-24
431	0	2005-05-04	2013-10-22	33	155	63	26.22	3TC+D4T30+NVP	1	1	0	0	2		1	2	2	1	2	2	0	1062	0	92.04	76.17	3	2	2	2	0	0	0	0	0	0	2		0	0	2	0	1900-01-02	2	2	1	2014-07-01	252	3	2007-12-19
4310	1	2013-06-24	2013-07-08	35	171	64	21.89	3TC+EFV600+TDF	0	2	0	0	2		1	2	2	1	2	2	1	102	9999999	117.71	70.22	3	1	2	1	2	2	1	2	2	2	2		0	0	2	0	1900-01-02	2	2	1	2014-07-01	358	2	2013-06-24
4312	1	2013-06-25	2013-07-04	30	157	52	21.1	3TC+EFV600+TDF	0	2	0	0	2		1	2	2	1	2	2	0	8	9999999	100.9	69.73	3	2	9	2	0	0	0	0	0	0	2		0	0	2	0	1900-01-02	2	2	2	2013-09-02	60	1	2013-06-25
4313	1	2013-06-25	2013-07-12	36	161	48	18.52	3TC+EFV600+TDF	0	2	0	0	2		1	2	2	1	2	2	0	209	9999999	74.34	82.6	3	2	9	1	2	2	1	2	2	2	2		0	0	2	0	1900-01-02	2	2	1	2014-07-01	354	3	2013-06-25
4314	1	2013-06-25	2013-07-11	33	168	56	19.84	3TC+EFV600+TDF	0	2	0	0	2		2	0	0	0	0	0	0	46	9999999	64.6	114.09	3	2	9	2	0	0	0	0	0	0	2		0	0	2	0	2013-11-25	2	1	2	2013-11-25	137	1	2013-06-25
4315	1	2013-06-26	2013-07-08	29	167	58	20.8	3TC+EFV600+TDF	0	2	0	0	2		1	2	2	1	2	2	0	235	9999999	95.58	82.85	3	2	2	1	2	2	1	2	2	2	2		0	0	2	0	1900-01-02	2	2	1	2014-07-01	358	3	2013-06-26
4316	1	2013-07-01	2013-08-08	31	157	43	17.44	3TC+EFV600+TDF	0	2	0	0	2		1	2	2	1	2	2	0	28	9999999	84.96	67.86	4	2	9	1	2	2	1	2	2	2	2		0	0	2	0	2013-08-20	1	1	4	2013-08-20	12	1	2013-07-01
4317	1	2013-07-01	2013-07-26	31	158	61	24.44	3TC+EFV600+TDF	0	2	0	0	2		1	2	2	1	2	2	1	83	9999999	93.8	87.19	3	1	9	2	0	0	0	0	0	0	2		0	0	2	0	1900-01-02	2	2	1	2014-07-01	340	1	2013-07-01
4318	1	2013-07-02	2013-07-31	42	169	60	21.01	3TC+EFV600+TDF	0	2	0	0	2		1	2	2	1	2	2	0	51	9999999	84.96	85.13	4	2	9	1	2	2	1	2	2	2	2		0	0	2	0	1900-01-02	2	2	1	2014-07-01	335	1	2013-07-02
4319	1	2013-07-02	2013-07-18	37	160	45	17.58	3TC+EFV600+TDF	0	2	0	0	2		1	2	2	1	1	2	0	12	9999999	90.3	63.13	4	2	9	1	2	2	1	2	2	2	2		0	0	2	0	2013-08-28	1	1	4	2013-08-28	41	1	2013-07-02
4321	0	2013-07-04	2013-07-16	24	154	50	21.08	3TC+EFV600+TDF	0	2	0	0	2		1	2	2	1	2	2	0	273	9999999	51.3	117.58	3	2	9	1	2	2	1	2	2	2	2		0	0	2	0	1900-01-02	2	2	1	2014-07-01	350	3	2013-07-04
4323	0	2013-07-08	2013-07-17	24	155	49	20.4	3TC+EFV600+TDF	0	2	0	0	2		1	2	2	1	2	2	0	226	9999999	73.46	80.47	3	2	2	2	0	0	0	0	0	0	2		0	0	2	0	1900-01-02	2	2	1	2014-07-01	349	3	2013-07-08
4324	1	2013-07-08	2013-07-25	53	159	50	19.78	3TC+EFV600+TDF	0	2	0	0	2		1	2	2	1	2	2	1	134	9999999	88.5	60.46	3	1	9	1	2	2	1	2	2	2	2		0	0	2	0	1900-01-02	2	2	6	2014-04-07	256	2	2013-07-08
4325	1	2013-07-08	2013-07-18	36	160	46	17.97	3TC+EFV600+TDF	0	2	0	0	2		1	2	2	1	1	2	0	114	9999999	93.81	62.73	4	2	2	1	2	2	1	2	2	2	2		0	1	2	0	1900-01-02	2	2	1	2014-07-01	348	2	2013-07-08
4326	1	2013-07-08	2013-07-26	35	165	46	16.9	3TC+EFV600+TDF	0	2	0	0	2		1	2	2	1	2	2	0	199	9999999	69.03	86.06	3	2	9	2	0	0	0	0	0	0	2		0	0	2	0	1900-01-02	2	2	1	2014-07-01	340	2	2013-07-08
4327	1	2013-07-09	2013-07-17	54	162	53	20.2	3TC+EFV600+TDF	0	2	0	0	2		1	2	2	1	2	2	1	133	9999999	84.07	66.69	3	1	9	2	0	0	0	0	0	0	2		0	0	2	0	1900-01-02	2	2	1	2014-07-01	349	2	2013-07-09
4328	1	2013-07-09	2013-07-09	43	163	51	19.2	d4t	1	1	0	0	2		2	0	0	0	0	0	1	312	9999999	74	82.23	3	1	2	2	0	0	0	0	0	0	2		0	0	2	0	1900-01-02	2	2	1	2014-07-01	357	3	2013-07-09
4329	0	2013-07-09	2013-07-24	38	148	50	22.83	3TC+EFV600+TDF	0	2	0	0	2		1	2	2	1	2	2	0	389	9999999	77	68.88	2	2	2	2	0	0	0	0	0	0	2		0	0	2	0	1900-01-02	2	2	1	2014-07-01	342	3	2013-06-24
433	1	2005-05-05	2012-10-17	33	167	59	21.16	3TC+D4T30+NVP	1	1	0	0	2		1	2	2	1	2	1	9	472	0	103.5	75.02	3	1	2	1	2	2	1	2	2	2	2		0	0	2	0	1900-01-02	2	2	1	2014-07-01	622	3	2005-05-05
4332	0	2013-07-10	2013-08-08	23	163	75	28.23	3TC+EFV600+TDF	0	2	1	0	2		1	2	2	1	2	2	0	359	9999999	84.07	108.55	1	2	9	1	2	2	1	2	2	2	2		0	1	2	0	1900-01-02	2	2	2	2013-10-10	63	3	2013-07-10
4333	1	2013-07-10	2013-07-18	43	160	49	19.14	3TC+EFV600+TDF	0	2	1	0	2		1	2	2	1	1	2	0	30	9999999	59.48	98.29	3	2	1	1	2	2	1	2	2	2	2		0	1	1	2	2014-04-30	2	2	5	2014-04-30	286	1	2013-07-10
4334	0	2013-07-11	2013-08-06	25	142	42	20.83	3TC+EFV600+TDF	0	2	0	0	2		2	0	0	0	0	0	1	415	9999999	72.57	69.22	3	1	2	1	2	2	2	2	2	1	2		0	0	2	0	1900-01-02	2	2	1	2014-07-01	329	3	2013-07-11
4335	1	2013-07-11	2013-08-15	41	154	70	29.52	3TC+EFV600+TDF	0	2	0	0	2		1	2	2	1	2	2	0	92	9999999	65.5	130.14	3	2	9	2	0	0	0	0	0	0	2		0	0	2	0	1900-01-02	2	2	1	2014-07-01	320	1	2013-07-11
4336	1	2013-07-11	2013-08-13	39	166	70	25.4	3TC+EFV600+TDF	0	2	0	0	2		2	0	0	0	0	0	0	199	9999999	85.8	101.35	1	2	9	2	0	0	0	0	0	0	2		0	0	2	0	1900-01-02	2	2	1	2014-07-01	322	2	2013-07-11
4337	1	2013-07-11	2013-08-07	36	158	37	14.82	3TC+EFV600+TDF	0	2	0	0	2		1	2	2	1	2	2	0	20	9999999	95.6	49.51	4	2	2	1	2	2	1	2	2	2	2		0	0	2	0	1900-01-02	2	2	1	2014-07-01	328	1	2013-07-11
4339	1	2013-07-12	2013-07-23	32	167	65	23.31	3TC+EFV600+TDF	0	2	0	0	2		1	2	2	1	2	2	0	76	9999999	74.34	116.15	3	2	9	1	2	2	1	2	2	2	2		0	0	2	0	1900-01-02	2	2	1	2014-07-01	343	1	2013-07-12
434	1	2005-05-05	2013-05-10	37	158	52	20.83	3TC+D4T30+EFV600	1	1	0	0	2		1	2	2	1	2	2	9	377	0	104.43	63.08	3	1	9	2	0	0	0	0	0	0	2		0	0	2	0	1900-01-02	2	2	1	2014-07-01	417	3	2005-05-05
4340	0	2013-07-12	2013-07-25	36	148	36	16.44	3TC+EFV600+TDF	0	2	0	0	2		1	2	2	1	2	2	0	45	9999999	53.1	73.33	4	2	9	1	2	2	1	2	2	2	2		0	0	2	0	1900-01-02	2	2	1	2014-07-01	341	1	2013-07-12
4341	1	2013-07-15	2013-07-25	35	170	44	15.22	3TC+EFV600+TDF	0	2	0	0	2		1	2	2	1	2	2	1	386	9999999	86.73	65.52	3	1	9	1	2	2	1	2	2	2	2		0	0	2	0	2013-07-31	1	1	4	2013-07-31	6	3	2013-07-15
4342	1	2013-07-15	2013-08-13	38	167	53	19	3TC+EFV600+TDF	0	2	0	0	2		1	2	2	1	2	2	1	89	9999999	97.3	68.34	4	1	9	2	0	0	0	0	0	0	2		0	0	2	0	1900-01-02	2	2	1	2014-07-01	322	1	2013-07-15
4343	1	2013-07-15	2013-07-15	35	161	54	20.83	3TC+EFV600+TDF	0	2	0	0	2		1	2	2	1	2	2	1	372	9999999	999	999	3	1	9	1	2	2	1	2	2	2	2		0	0	2	0	1900-01-02	2	2	1	2014-07-01	351	3	2013-07-15
4344	0	2013-07-15	2013-07-25	35	152	43	18.61	3TC+EFV600+TDF	0	2	0	0	2		1	2	2	1	1	2	0	42	9999999	70.8	66.32	3	2	9	1	2	2	1	2	2	2	2		0	0	2	0	1900-01-02	2	2	1	2014-07-01	341	1	2013-07-15
4345	1	2013-07-15	2013-07-25	39	168	57	20.2	3TC+EFV600+TDF	0	2	0	0	2		1	2	2	1	2	2	1	277	9999999	110.62	64.01	3	1	2	2	0	0	0	0	0	0	2		0	0	2	0	1900-01-02	2	2	1	2014-07-01	341	3	2013-07-15
4347	1	2013-07-17	2013-07-29	59	157	45	18.26	3TC+EFV600+TDF	0	2	0	0	2		1	2	2	1	1	2	0	21	9999999	84.07	53.33	4	2	9	1	2	2	1	1	2	2	2		0	0	2	0	1900-01-02	2	2	6	2014-07-01	337	1	2013-07-17
4348	0	2013-07-17	2013-08-05	57	155	53	22.06	3TC+EFV600+TDF	0	2	0	0	2		2	0	0	0	0	0	0	359	9999999	76.11	60.11	1	2	9	2	0	0	0	0	0	0	2		0	0	2	0	1900-01-02	2	2	1	2014-07-01	330	3	2013-07-17
4349	0	2013-07-18	2013-07-31	34	158	56	22.43	3TC+EFV600+TDF	0	2	1	0	2		1	2	2	1	2	2	0	412	9999999	94.69	65.2	2	2	9	1	2	2	1	2	2	2	2		0	1	2	0	1900-01-02	2	2	1	2014-07-01	335	3	2013-07-18
4350	1	2013-07-23	2013-08-01	40	164	53	19.71	3TC+EFV600+TDF	0	2	0	0	2		1	2	2	1	2	2	0	89	9999999	84.07	77.54	3	2	9	1	2	2	1	2	2	1	2		0	0	2	0	1900-01-02	2	2	1	2014-07-01	334	1	2013-07-23
4351	1	2013-07-25	2013-08-07	32	162	39	14.86	3TC+EFV600+TDF	0	2	0	0	2		1	2	2	1	2	2	1	176	9999999	76.1	68.08	3	1	9	1	2	2	1	2	2	2	2		0	0	2	0	1900-01-02	2	2	2	2014-02-04	181	2	2013-07-25
4352	0	2013-07-25	2013-08-06	35	162	48	18.29	3TC+EFV600+TDF	0	2	0	0	2		1	2	2	1	2	2	0	212	9999999	72.57	72.23	2	2	9	1	2	2	1	2	2	2	2		0	0	2	0	1900-01-02	2	2	1	2014-07-01	329	3	2013-07-25
4354	0	2013-07-26	2013-08-13	30	153	56	23.92	3TC+EFV600+TDF	0	2	1	0	2		1	2	2	1	2	2	0	296	9999999	89.39	71.67	3	2	9	1	2	2	1	2	2	2	2		0	1	2	0	1900-01-02	2	2	1	2014-07-01	322	3	2013-07-26
4355	1	2013-07-26	2013-08-07	38	171	58	19.84	3TC+EFV600+TDF	0	2	0	0	2		1	2	2	1	2	2	0	113	9999999	103.97	69.99	3	2	9	1	2	2	1	2	2	2	2		0	0	2	0	1900-01-02	2	2	1	2014-07-01	328	2	2013-07-26
4356	1	2013-07-26	2013-09-02	37	155	40	16.65	3TC+EFV600+TDF	0	2	0	0	2		1	2	2	1	2	2	0	15	9999999	73.46	68.98	4	2	9	2	0	0	0	0	0	0	2		0	0	2	0	2013-11-03	1	1	4	2013-11-03	62	1	2013-07-26
4357	1	2013-07-29	2013-08-19	37	164	44	16.36	3TC+EFV600+TDF	0	2	0	0	2		1	2	2	1	2	2	0	27	9999999	69	80.79	4	2	9	1	2	2	1	2	2	2	2		1	0	2	0	1900-01-02	2	2	1	2014-07-01	316	1	2013-07-29
4358	0	2013-07-29	2013-08-08	25	164	54	20.08	3TC+EFV600+TDF	0	2	0	0	2		1	2	2	1	2	2	0	91	9999999	53.99	119.62	4	2	9	2	0	0	0	0	0	0	2		0	0	2	0	1900-01-02	2	2	1	2014-07-01	327	1	2013-07-29
4362	1	2013-07-31	2013-08-08	27	167	62	22.23	3TC+EFV600+TDF	0	2	0	0	2		1	2	2	1	2	2	0	221	9999999	126.55	68.09	1	2	9	2	0	0	0	0	0	0	2		0	0	2	0	1900-01-02	2	2	1	2014-07-01	327	3	2013-07-31
4363	0	2013-08-02	2013-08-12	39	148	47	21.46	3TC+EFV600+TDF	0	2	0	0	2		1	2	2	1	2	2	0	53	9999999	87.61	56.35	4	2	9	1	2	2	1	2	2	2	2		0	0	2	0	1900-01-02	2	2	1	2014-07-01	323	1	2013-08-02
4364	0	2013-08-05	2013-08-14	35	158	33	13.22	3TC+EFV600+TDF	0	2	0	0	2		1	2	2	1	2	2	0	16	9999999	48.67	74.04	3	2	9	1	2	2	1	2	2	2	2		0	0	2	0	1900-01-02	2	2	1	2014-07-01	321	1	2013-08-05
4365	0	2013-08-05	2013-08-14	49	149	53	23.87	3TC+EFV600+TDF	0	2	0	0	2		1	2	2	1	2	2	0	73	9999999	69.03	72.66	4	2	9	1	2	2	1	2	2	2	2		0	0	2	0	1900-01-02	2	2	1	2014-07-01	321	1	2013-08-05
4366	1	2013-08-05	2013-08-14	27	153	49	20.93	3TC+EFV600+TDF	0	2	0	0	2		1	2	2	1	2	2	0	63	9999999	67.3	101.2	4	2	9	1	2	2	1	2	2	2	2		0	0	2	0	1900-01-02	2	2	1	2014-07-01	321	1	2013-08-05
4367	1	2013-08-05	2013-08-08	42	156	53	21.78	3TC+EFV600+TDF	0	2	0	0	2		1	2	2	1	2	2	0	25	9999999	100.89	63.32	2	2	2	2	0	0	0	0	0	0	2		0	0	2	0	2014-01-30	1	1	4	2014-01-30	175	1	2013-08-05
4368	0	2013-08-08	2013-08-21	41	146	42	19.7	3TC+EFV600+TDF	0	2	0	0	2		1	2	2	1	2	2	1	16	9999999	81.4	53.12	4	1	9	1	2	2	1	2	2	2	2		0	0	2	0	1900-01-02	2	2	1	2014-07-01	314	1	2013-08-08
4369	0	2013-08-09	2013-08-21	47	160	47	18.36	3TC+EFV600+TDF	0	2	0	0	2		1	2	2	1	2	2	0	238	9999999	84.96	53.51	3	2	9	1	2	2	1	2	2	2	2		0	0	2	0	1900-01-02	2	2	1	2014-07-01	314	3	2013-08-09
4372	1	2013-08-13	2013-08-27	36	169	58	20.31	3TC+EFV600+TDF	0	2	0	0	2		1	2	2	1	2	2	1	21	9999999	83.2	89.17	4	1	9	1	2	2	1	2	2	2	2		0	0	2	0	1900-01-02	2	2	1	2014-07-01	308	1	2013-08-13
4373	1	2013-08-14	2013-09-03	43	168	48	17.01	3TC+EFV600+TDF	0	2	0	0	2		1	2	2	1	2	2	0	6	9999999	66.38	86.27	4	2	9	1	2	2	1	2	2	2	2		0	0	2	0	1900-01-02	2	2	1	2014-07-01	301	1	2013-08-13
4376	1	2013-08-15	2013-09-03	34	158	46	18.43	3TC+EFV600+TDF	0	2	0	0	2		1	2	2	1	2	2	0	9	9999999	71.68	83.67	4	2	9	1	2	2	1	2	2	2	2		0	0	2	0	1900-01-02	2	2	1	2014-07-01	301	1	2013-08-15
4378	1	2013-08-16	2013-09-10	27	155	50	20.81	3TC+EFV600+TDF	0	2	0	0	2		1	2	2	1	2	2	0	76	9999999	101.78	68.28	3	2	9	1	2	2	1	2	2	2	2		0	0	2	0	1900-01-02	2	2	1	2014-07-01	294	1	2013-08-16
4379	0	2013-08-16	2013-10-09	36	154	58	24.46	3TC+EFV600+TDF	0	2	0	0	2		2	0	0	0	0	0	0	312	9999999	79.65	78.76	2	2	9	2	0	0	0	0	0	0	2		0	0	2	0	1900-01-02	2	2	1	2014-07-01	265	3	2013-08-16
4380	0	2013-08-16	2013-08-29	49	150	36	16	3TC+EFV600+TDF	0	2	0	0	2		1	2	2	1	2	2	0	174	9999999	64.61	52.73	4	2	9	2	0	0	0	0	0	0	2		0	0	2	0	1900-01-02	2	2	1	2014-07-01	306	2	2013-08-16
4381	0	2013-08-19	2013-09-06	50	152	47	20.34	3TC+EFV600+TDF	0	2	0	0	2		1	2	2	1	2	2	0	67	9999999	78.76	55.86	3	2	9	1	2	2	1	2	2	2	2		0	0	2	0	1900-01-02	2	2	6	2014-07-01	298	1	2013-08-19
4382	1	2013-08-19	2013-09-04	37	168	54	19.13	3TC+EFV600+TDF	0	2	1	0	2		1	2	2	1	2	2	0	168	9999999	109.7	62.36	3	2	9	1	2	2	1	2	2	2	2		0	0	2	0	1900-01-02	2	2	1	2014-07-01	300	2	2013-08-19
4383	0	2013-08-20	2013-08-20	33	152	78	33.76	3TC+EFV600+TDF	0	2	0	0	2		2	0	0	0	0	0	0	554	9999999	58.4	148.63	1	2	9	2	0	0	0	0	0	0	2		0	0	2	0	1900-01-02	2	2	1	2014-07-01	315	3	2013-08-20
4387	1	2013-08-26	2013-09-02	49	159	58	22.94	3TC+EFV600+TDF	0	2	0	0	2		1	2	2	1	2	2	0	65	9999999	116.8	55.58	4	2	9	1	2	2	1	2	2	2	2		0	0	2	0	1900-01-02	2	2	1	2014-07-01	302	1	2013-08-26
4389	0	2013-08-26	2013-09-02	50	147	61	28.23	3TC+EFV600+TDF	0	2	0	0	2		1	2	2	1	2	2	0	1046	9999999	106.2	53.76	4	2	9	2	0	0	0	0	0	0	2		0	0	2	0	1900-01-02	2	2	1	2014-07-01	302	3	2013-08-26
4390	1	2013-08-27	2013-09-16	37	153	45	19.22	3TC+EFV600+TDF	0	2	0	0	2		1	2	2	1	2	2	0	24	9999999	97.65	58.38	4	2	9	1	2	2	1	2	2	2	2		0	0	2	0	1900-01-02	2	2	1	2014-07-01	288	1	2013-08-27
4392	1	2013-08-27	2013-09-13	34	159	41	16.22	3TC+EFV600+TDF	0	2	0	0	2		1	2	2	1	1	2	0	104	9999999	78.76	67.87	4	2	9	1	2	2	1	2	2	2	2		0	0	2	0	2013-11-28	2	2	2	2013-11-28	76	2	2013-08-27
4393	1	2013-08-28	2013-09-05	34	162	55	20.96	3TC+EFV600+TDF	0	2	0	0	2		1	2	2	1	2	2	0	69	9999999	87.61	81.85	4	2	9	1	2	2	1	2	2	2	2		0	0	2	0	1900-01-02	2	2	1	2014-07-01	299	1	2013-08-28
4394	1	2013-08-28	2013-09-24	37	159	49	19.38	3TC+EFV600+TDF	0	2	0	0	2		1	2	2	1	2	2	0	13	9999999	83.19	74.62	4	2	9	1	2	2	1	2	2	2	2		0	0	2	0	1900-01-02	2	2	1	2014-07-01	280	1	2013-08-28
4395	1	2013-08-28	2013-09-13	46	160	49	19.14	3TC+EFV600+TDF	0	2	0	0	2		1	2	2	1	2	2	0	12	9999999	80.54	70.34	4	2	9	1	2	2	1	2	2	2	2		0	0	2	0	1900-01-02	2	2	1	2014-07-01	291	1	2013-08-28
4398	1	2013-08-29	2013-09-05	22	155	41	17.07	3TC+EFV600+TDF	0	2	0	0	2		1	2	2	1	2	2	0	8	9999999	108.86	54.66	3	2	9	2	0	0	0	0	0	0	2		0	0	2	0	2013-09-19	1	1	4	2013-09-19	14	1	2013-08-28
4399	0	2013-08-30	2013-10-11	40	149	41	18.47	3TC+AZT+NVP	1	2	0	0	2		1	2	2	1	2	2	0	9999	9999999	63.7	66.94	4	2	9	1	2	2	1	2	2	2	2		0	0	2	0	1900-01-02	2	2	1	2014-07-01	263	3	2013-08-30
4400	1	2013-09-02	2013-09-23	52	163	60	22.58	3TC+EFV600+TDF	0	2	0	0	2		1	2	2	1	2	2	0	15	9999999	100	64.94	4	2	9	2	0	0	0	0	0	0	2		0	0	2	0	1900-01-02	2	2	1	2014-07-01	281	1	2013-09-02
4401	0	2013-09-03	2013-09-23	35	167	42	15.06	3TC+EFV600+TDF	0	2	0	0	2		1	2	2	1	2	2	1	66	9999999	58.4	78.53	4	1	9	1	2	2	1	2	2	2	2		0	0	2	0	1900-01-02	2	2	1	2014-07-01	281	1	2013-09-03
4402	0	2013-09-03	2013-09-10	32	159	43	17.01	3TC+EFV600+TDF	0	2	0	0	2		1	2	2	1	2	2	0	14	9999999	68.14	70.88	4	2	2	1	2	2	1	2	2	2	2		0	0	2	0	1900-01-02	2	2	2	2014-02-27	170	1	2013-09-03
4403	1	2013-09-04	2013-09-20	37	163	49	18.44	3TC+EFV600+TDF	0	2	0	0	2		2	0	0	0	0	0	1	550	9999999	93.8	66.18	1	1	9	2	0	0	0	0	0	0	2		0	0	2	0	1900-01-02	2	2	1	2014-07-01	284	3	2013-09-04
4404	1	2013-09-05	2013-09-19	38	169	55	19.26	3TC+EFV600+TDF	0	2	0	0	2		1	2	2	1	2	2	0	50	9999999	56.64	121.83	4	2	9	1	2	2	1	2	2	2	2		0	0	2	0	1900-01-02	2	2	1	2014-07-01	285	1	2013-09-05
4406	1	2013-09-09	2013-09-30	35	159	47	18.59	3TC+EFV600+TDF	0	2	0	0	2		1	2	2	1	2	2	0	25	9999999	124.79	48.64	4	2	9	1	2	2	1	2	2	2	2		0	0	2	0	1900-01-02	2	2	1	2014-07-01	274	1	2013-09-09
4407	1	2013-09-09	2013-09-16	30	156	55	22.6	3TC+EFV600+TDF	0	2	0	0	2		1	2	2	1	1	2	0	340	9999999	63.72	116.78	3	2	9	1	2	2	1	1	2	2	2		0	0	2	0	1900-01-02	2	2	1	2014-07-01	288	3	2013-09-09
4408	0	2013-09-09	2013-09-18	49	150	36	16	3TC+EFV600+TDF	0	2	0	0	2		1	2	2	1	2	2	0	138	9999999	58.41	58.33	4	2	9	1	2	2	1	2	2	2	2		0	0	2	0	2013-11-23	1	1	4	2013-11-23	66	2	2013-09-09
4409	0	2013-09-10	2013-09-17	28	154	51	21.5	3TC+EFV600+TDF	0	2	0	0	2		1	2	2	1	2	2	1	96	9999999	81.42	72.96	3	1	9	1	2	2	1	2	2	2	2		0	0	2	0	1900-01-02	2	2	1	2014-07-01	287	1	2013-09-10
4410	1	2013-09-10	2013-09-16	39	163	54	20.32	3TC+EFV600+TDF	0	2	0	0	2		1	2	2	1	1	2	0	118	9999999	77	87.12	3	2	9	1	2	2	1	2	2	2	2		0	0	2	0	2013-11-12	2	2	2	2013-11-12	57	2	2013-09-10
4412	1	2013-09-11	2013-10-01	34	163	52	19.57	3TC+EFV600+TDF	0	2	0	0	2		1	2	2	1	2	2	1	68	9999999	91.15	74.38	4	1	2	1	2	2	1	2	2	2	2		0	0	2	0	1900-01-02	2	2	1	2014-07-01	273	1	2013-09-11
4414	1	2013-09-13	2013-09-25	38	161	30	11.57	3TC+EFV600+TDF	0	2	0	0	2		1	2	2	1	2	2	0	10	9999999	69.03	54.52	4	2	9	1	2	2	1	2	2	2	2		0	0	2	0	2013-11-26	1	1	4	2013-11-26	62	1	2013-09-13
4415	0	2013-09-16	2013-10-04	43	148	32	14.61	3TC+EFV600+TDF	0	2	0	0	2		1	2	2	1	1	2	1	160	9999999	61.95	52.11	3	1	2	1	2	2	1	1	2	2	2		0	0	2	0	1900-01-02	2	2	6	2014-07-01	270	2	2013-09-16
4416	1	2013-09-17	2013-09-23	34	170	60	20.76	3TC+EFV600+TDF	0	2	0	0	2		1	2	2	1	1	2	0	83	9999999	111.51	70.15	3	2	9	1	2	2	1	2	2	2	2		0	0	2	0	1900-01-02	2	2	1	2014-07-01	281	1	2013-09-17
4418	1	2013-09-19	2013-10-07	39	150	55	24.44	3TC+EFV600+TDF	0	2	0	0	2		1	2	2	1	2	2	0	37	9999999	77	88.74	3	2	9	1	2	2	1	2	2	2	2		0	0	2	0	1900-01-02	2	2	1	2014-07-01	267	1	2013-09-19
4420	1	2013-09-23	2013-10-09	38	160	51	19.92	3TC+EFV600+TDF	0	2	0	1	2		1	2	2	1	2	2	0	240	9999999	77	83.1	3	2	9	1	2	2	1	2	2	2	2		1	0	2	0	1900-01-02	2	2	1	2014-07-01	265	3	2013-09-23
4422	0	2013-09-25	2013-10-03	45	156	46	18.9	3TC+EFV600+TDF	0	2	0	0	2		1	2	2	1	2	2	0	258	9999999	39.83	114.1	3	2	9	1	2	2	1	2	2	2	2		0	0	2	0	1900-01-02	2	2	1	2014-07-01	271	3	2013-09-25
4423	0	2013-09-26	2013-10-08	40	158	52	20.83	3TC+EFV600+TDF	0	2	0	0	2		1	2	2	1	2	2	0	21	9999999	66.38	81.47	3	2	9	1	2	2	1	2	2	2	2		0	1	2	0	1900-01-02	2	2	1	2014-07-01	266	1	2013-09-26
4424	0	2013-09-27	2013-10-07	35	151	42	18.42	3TC+EFV600+TDF	0	2	0	0	2		2	0	0	0	0	0	0	356	9999999	60.18	76.21	1	2	9	2	0	0	0	0	0	0	2		0	0	2	0	1900-01-02	2	2	6	2014-07-01	267	3	2013-09-27
4427	0	2013-09-30	2013-11-07	31	151	44	19.3	3TC+EFV600+TDF	0	2	0	0	2		1	2	2	1	2	2	0	163	9999999	71.68	69.58	3	2	9	1	2	2	1	2	2	2	2		0	0	2	0	1900-01-02	2	2	1	2014-07-01	236	2	2013-09-30
4428	0	2013-09-30	2013-10-03	26	149	40	18.02	3TC+EFV600+TDF	0	2	0	0	2		1	2	2	1	1	2	0	18	9999999	82.31	57.62	3	2	9	1	2	2	1	2	2	2	2		0	0	2	0	1900-01-02	1	2	4	2014-03-07	155	1	2013-09-30
4429	1	2013-09-30	2013-10-21	47	163	49	18.44	3TC+EFV600+TDF	0	2	0	0	2		1	2	2	1	2	2	1	23	9999999	109.74	51.08	3	1	9	1	2	2	1	2	2	2	2		0	0	2	0	1900-01-02	2	2	1	2014-07-01	253	1	2013-09-30
4430	0	2013-09-30	2013-10-21	40	155	51	21.23	3TC+EFV600+TDF	0	2	0	0	2		1	2	2	1	2	2	1	17	9999999	70.8	74.92	3	1	2	2	1	0	0	0	0	0	2		0	0	2	0	1900-01-02	2	2	6	2014-07-01	253	1	2013-09-30
4431	1	2013-10-01	2013-10-22	42	157	49	19.88	3TC+EFV600+TDF	0	2	0	0	2		1	2	2	1	2	2	1	273	9999999	85.07	69.43	3	1	9	1	2	2	1	2	2	2	2		0	0	2	0	1900-01-02	2	2	1	2014-07-01	252	3	2013-10-01
4432	0	2013-10-02	2013-10-11	28	149	33	14.86	3TC+EFV600+TDF	0	2	0	0	2		1	2	2	1	2	2	0	315	9999999	61.06	62.95	2	2	9	1	2	2	1	2	2	2	2		0	0	2	0	1900-01-02	2	2	1	2014-07-01	263	3	2013-10-02
4434	1	2013-10-02	2013-10-22	37	161	48	18.52	3TC+EFV600+TDF	0	2	0	0	2		1	2	2	1	2	2	0	20	9999999	43.37	140.21	4	2	9	1	2	2	1	2	2	2	2		0	0	2	0	1900-01-02	2	2	1	2014-07-01	252	1	2013-10-02
4435	0	2013-10-02	2013-10-07	38	155	58	24.14	3TC+EFV600+TDF	0	2	1	0	2		2	0	0	0	0	0	0	370	9999999	89.39	68.83	3	2	9	2	0	0	0	0	0	0	2		0	0	2	0	2013-11-20	2	1	2	2013-11-29	53	3	2013-10-02
4436	1	2013-10-03	2013-10-09	36	171	56	19.15	3TC+EFV600+TDF	1	2	0	0	2		1	2	2	1	1	2	0	15	9999999	100	71.64	4	2	9	1	2	2	1	2	2	2	2		0	0	2	0	1900-01-02	2	2	1	2014-07-01	265	1	2013-10-02
4437	1	2013-10-03	2013-10-14	43	167	45	16.14	3TC+EFV600+TDF	0	2	0	0	2		1	2	2	1	2	2	1	49	9999999	76.11	70.54	3	1	9	1	2	2	1	2	2	2	2		0	0	2	0	1900-01-02	1	2	4	2014-01-18	96	1	2013-10-03
4439	1	2013-10-07	2013-10-28	35	163	46	17.31	3TC+EFV600+TDF	0	2	0	0	2		1	2	2	1	2	2	0	19	9999999	53.1	111.88	4	2	1	1	2	2	1	2	2	2	2		0	0	2	0	1900-01-02	2	2	1	2014-07-01	246	1	2013-10-07
4440	0	2013-10-07	2013-11-05	31	161	43	16.59	3TC+EFV600+TDF	0	2	0	0	2		1	2	2	1	2	2	0	19	9999999	54.87	88.84	3	2	9	1	2	2	1	2	2	2	2		0	0	2	0	1900-01-02	2	2	1	2014-07-01	238	1	2013-10-07
4442	1	2013-10-07	2013-10-21	50	155	48	19.98	3TC+EFV600+TDF	0	2	0	0	2		1	2	2	1	2	2	0	388	9999999	107.08	49.62	3	2	9	1	2	2	1	2	2	2	2		0	0	2	0	1900-01-02	2	2	6	2014-07-01	253	3	2013-10-07
4445	1	2013-10-10	2013-10-28	45	163	50	18.82	3TC+EFV600+TDF	0	2	0	0	2		1	2	2	1	2	2	0	281	9999999	98.23	59.48	3	2	9	1	2	2	1	2	2	2	2		0	0	2	0	1900-01-02	2	2	1	2014-07-01	246	3	2013-10-10
4447	1	2013-10-11	2013-11-12	32	166	49	17.78	3TC+EFV600+TDF	0	2	0	0	2		1	2	2	1	2	2	0	14	9999999	71.68	90.81	4	2	9	2	0	0	0	0	0	0	2		0	0	2	0	2013-12-16	1	1	4	2013-12-16	34	1	2013-10-11
4449	1	2013-10-14	2013-10-24	25	156	41	16.85	3TC+EFV600+TDF	0	2	0	0	2		1	2	2	1	2	2	0	12	9999999	50.44	114.98	3	2	9	1	2	2	1	2	2	2	2		0	0	2	0	2014-04-04	2	2	2	2014-04-04	162	1	2013-10-14
4450	0	2013-10-14	2013-11-11	20	154	39	16.44	3TC+EFV600+TDF	0	2	0	0	2		1	2	2	1	2	2	0	26	9999999	78.77	61.79	4	2	9	1	2	2	1	2	2	2	2		0	0	2	0	1900-01-02	2	2	1	2014-07-01	232	1	2013-10-14
4452	1	2013-10-14	2013-11-01	42	157	56	22.72	3TC+EFV600+TDF	0	2	0	1	2		1	2	2	1	2	2	0	94	9999999	66	102.28	4	2	2	1	2	2	1	2	2	2	2		1	0	2	0	1900-01-02	2	2	1	2014-07-01	242	1	2013-10-14
4453	0	2013-10-15	2013-10-23	32	158	43	17.22	3TC+EFV600+TDF	0	2	0	0	2		1	2	2	1	2	2	0	80	9999999	58.41	82.69	2	2	9	1	2	2	1	2	2	2	2		0	0	2	0	1900-01-02	2	2	1	2014-07-01	251	1	2013-10-15
4454	1	2013-10-15	2013-10-21	42	155	51	21.23	3TC+EFV600+TDF	0	2	0	0	2		1	2	2	1	2	2	0	116	9999999	107.97	56.94	3	2	9	1	2	2	1	2	2	2	2		0	0	2	0	1900-01-02	2	2	1	2014-07-01	253	2	2013-10-15
4456	1	2013-10-15	2013-10-31	21	155	42	17.48	3TC+EFV600+TDF	0	2	0	0	2		1	2	2	1	2	2	0	19	9999999	67.3	91.35	4	2	2	1	2	2	1	2	2	2	2		0	0	2	0	1900-01-02	2	1	2	2014-05-02	183	1	2013-10-15
4457	1	2013-10-16	2013-11-11	35	172	67	22.65	3TC+EFV600+TDF	0	2	0	0	2		1	2	2	1	2	2	0	329	9999999	100.89	85.77	4	2	9	1	2	2	1	2	2	2	2		0	0	2	0	1900-01-02	2	2	1	2014-07-01	232	3	2013-10-16
4458	1	2013-10-16	2013-10-22	30	158	52	20.83	3TC+EFV600+TDF	0	2	0	0	2		1	2	2	1	2	2	0	207	9999999	94.69	74.3	3	2	9	1	2	2	1	2	2	2	2		0	0	2	0	1900-01-02	2	2	1	2014-07-01	252	3	2013-10-16
4459	0	2013-10-17	2013-11-12	30	150	53	23.56	3TC+EFV600+TDF	0	2	0	0	2		1	2	2	1	2	2	0	347	9999999	77	78.74	3	2	9	1	2	2	1	2	2	2	2		0	0	2	0	1900-01-02	1	2	4	2014-04-24	163	3	2013-10-17
4460	1	2013-10-18	2013-11-06	26	161	40	15.43	3TC+EFV600+TDF	0	2	0	0	2		1	2	2	1	2	2	0	21	9999999	59.29	94.6	4	2	2	1	1	2	1	2	2	2	2		0	0	2	0	1900-01-02	2	2	1	2014-07-01	237	1	2013-10-18
4462	1	2013-10-21	2013-11-04	33	163	44	16.56	3TC+EFV600+TDF	0	2	0	0	2		1	2	2	1	2	2	0	37	9999999	72.49	79.88	4	2	9	1	2	2	1	2	2	2	2		0	0	2	0	1900-01-02	2	2	1	2014-07-01	239	1	2013-10-21
4465	1	2013-10-23	2013-11-01	40	151	48	21.05	3TC+EFV600+TDF	0	2	0	1	2		1	2	2	1	2	2	0	241	9999999	91.18	64.75	3	2	9	1	2	2	1	2	2	2	2		1	0	2	0	1900-01-02	2	2	1	2014-07-01	242	3	2013-10-23
4467	1	2013-10-23	2013-11-21	30	153	65	27.77	3TC+EFV600+TDF	0	2	0	0	2		1	2	2	1	2	2	0	342	9999999	75.22	116.92	1	2	9	1	2	2	1	2	2	2	2		0	0	2	0	1900-01-02	2	2	1	2014-07-01	222	3	2013-10-23
4468	1	2013-10-23	2013-10-30	36	157	47	19.07	3TC+EFV600+TDF	0	2	0	0	2		1	2	2	1	2	2	0	166	9999999	95.58	62.9	3	2	2	1	2	2	1	2	2	1	2		0	1	2	0	1900-01-02	2	2	1	2014-07-01	244	2	2013-10-23
4469	0	2013-10-23	2013-10-23	25	158	73	29.24	3TC+EFV600+TDF	0	2	0	0	2		2	0	0	0	0	0	0	340	9999999	32.74	266.67	1	2	9	1	2	2	1	2	2	2	2		0	0	2	0	1900-01-02	2	2	1	2014-07-01	251	3	2013-10-23
4470	1	2013-10-28	2013-11-13	37	170	57	19.72	3TC+EFV600+TDF	0	2	0	0	2		1	2	2	1	1	2	0	144	9999999	102.7	70.31	4	2	2	2	0	0	0	0	0	0	2		0	0	2	0	1900-01-02	2	2	1	2014-07-01	230	2	2013-10-28
4473	0	2013-10-28	2013-11-18	48	152	41	17.75	3TC+EFV600+TDF	0	2	1	0	2		1	2	2	1	2	2	0	120	9999999	69.03	56.83	4	2	9	1	2	2	1	2	2	2	2		0	1	2	0	1900-01-02	2	2	1	2014-07-01	225	2	2013-10-28
4474	0	2013-10-28	2013-10-31	38	152	51	22.07	3TC+EFV600+TDF	0	2	0	0	2		1	2	2	1	2	2	0	25	9999999	91.15	59.35	3	2	9	1	2	2	1	2	2	2	2		0	0	2	0	2014-01-06	1	1	4	2014-01-06	67	1	2013-10-28
4477	0	2013-10-30	2013-11-05	32	150	29	12.89	3TC+EFV600+TDF	0	2	0	0	2		1	2	2	1	2	2	0	62	9999999	52.22	62.38	4	2	9	1	2	2	1	2	2	2	2		0	0	2	0	1900-01-02	2	2	1	2014-07-01	238	1	2013-10-30
4478	0	2013-11-04	2013-11-12	39	158	47	18.83	3TC+EFV600+TDF	0	2	1	0	2		1	2	2	1	2	2	0	67	9999999	83.19	59.34	4	2	9	1	2	2	1	2	2	1	2		0	0	2	0	1900-01-02	2	2	1	2014-07-01	231	1	2013-11-04
4480	1	2013-11-05	2013-11-15	34	162	67	25.53	3TC+EFV600+TDF	0	2	0	0	2		1	2	2	1	2	2	0	33	9999999	101.78	85.83	3	2	9	1	2	2	1	2	2	2	2		0	0	2	0	1900-01-02	2	2	1	2014-07-01	228	1	2013-11-05
4482	0	2013-11-06	2013-11-22	35	159	61	24.13	3TC+EFV600+TDF	0	2	0	0	2		1	2	2	1	2	2	0	68	9999999	79.65	83.63	4	2	9	1	2	2	1	2	2	2	2		0	0	2	0	1900-01-02	2	2	1	2014-07-01	221	1	2013-11-06
4483	0	2013-11-11	2013-12-02	30	158	42	16.82	3TC+EFV600+TDF	0	2	0	0	2		1	2	2	1	2	2	0	28	9999999	73.46	65.41	4	2	9	1	2	2	1	2	2	2	2		0	0	2	0	1900-01-02	2	2	1	2014-07-01	211	1	2013-11-11
4484	1	2013-11-13	2013-11-19	35	158	55	22.03	3TC+EFV600+TDF	0	2	0	1	2		1	2	2	1	2	2	0	13	9999999	101.78	69.79	3	2	9	1	2	2	1	2	2	2	2		0	0	2	0	1900-01-02	2	2	1	2014-07-01	224	1	2013-11-12
4485	1	2013-11-12	2013-11-21	41	154	42	17.71	3TC+EFV600+TDF	0	2	0	0	2		1	2	2	1	2	2	0	20	9999999	68.14	75.06	4	2	9	1	2	2	1	2	2	2	2		0	0	2	0	1900-01-02	2	2	1	2014-07-01	222	1	2013-11-12
4486	1	2013-11-18	2013-11-25	42	167	73	26.18	3TC+EFV600+TDF	0	2	0	0	2		1	2	2	1	2	2	0	29	9999999	90.3	97.45	3	2	1	1	2	2	1	2	2	2	2		0	0	2	0	1900-01-02	2	2	1	2014-07-01	218	1	2013-11-18
4488	1	2013-11-18	2013-11-22	32	162	46	17.53	3TC+EFV600+TDF	0	2	0	0	2		1	2	2	1	2	2	0	15	9999999	53.98	113.2	3	2	9	1	2	2	1	2	2	2	2		0	0	2	0	1900-01-02	2	2	1	2014-07-01	221	1	2013-11-18
4489	1	2013-11-20	2013-12-06	36	162	47	17.91	3TC+EFV600+TDF	0	2	0	0	2		1	2	2	1	2	2	0	16	9999999	61.06	98.46	4	2	9	1	2	2	1	1	2	2	2		0	0	2	0	1900-01-02	2	2	1	2014-07-01	207	1	2013-11-20
4490	1	2013-11-21	2013-12-02	43	159	56	22.15	3TC+EFV600+TDF	0	2	0	0	2		1	2	2	1	2	2	0	14	9999999	65.5	102.01	3	2	9	1	2	2	1	2	2	2	2		0	0	2	0	2014-05-27	2	2	2	2014-05-27	176	1	2013-11-21
4493	1	2013-11-25	2013-12-11	37	165	58	21.3	3TC+EFV600+TDF	0	2	0	0	2		1	2	2	1	2	2	0	355	9999999	77.9	94.33	4	2	9	1	2	2	1	2	2	2	2		0	0	2	0	1900-01-02	2	2	1	2014-07-01	202	3	2013-11-25
4497	0	2013-12-02	2013-12-18	48	148	51	23.28	3TC+EFV600+TDF	0	2	0	0	2		1	2	2	1	1	2	0	117	9999999	46.9	104.04	3	2	9	1	2	2	1	2	2	1	2		0	0	2	0	2014-02-05	2	1	2	2014-02-05	49	2	2013-12-02
4498	0	2013-12-03	2013-12-18	31	158	38	15.22	3TC+EFV600+TDF	0	2	0	0	2		1	2	2	1	2	2	0	271	9999999	74.34	57.95	4	2	9	1	2	2	1	2	2	1	2		0	0	2	0	1900-01-02	2	2	1	2014-07-01	195	3	2013-12-03
4500	1	2013-12-04	2013-12-17	36	163	49	18.44	3TC+EFV600+TDF	0	2	0	0	2		1	2	2	1	1	2	0	42	9999999	82.31	76.15	4	2	2	1	2	2	1	2	2	2	2		0	0	2	0	1900-01-02	2	2	1	2014-07-01	196	1	2013-12-04
4501	1	2013-12-05	2013-12-12	36	173	57	19.05	3TC+EFV600+TDF	0	2	0	0	2		1	2	2	1	2	2	0	21	9999999	100.88	72.28	4	2	2	1	2	2	1	2	2	2	2		0	0	2	0	1900-01-02	2	2	1	2014-07-01	201	1	2013-12-05
4506	1	2013-12-09	2013-12-16	33	168	54	19.13	3TC+EFV600+TDF	0	2	0	0	2		2	2	2	2	2	2	1	468	9999999	100	71.07	2	1	9	2	0	0	0	0	0	0	2		0	0	2	0	1900-01-02	2	2	1	2014-07-01	197	3	2013-12-09
4508	1	2013-12-10	2013-12-17	47	157	57	23.12	3TC+EFV600+TDF	0	2	0	0	2		1	2	2	1	2	2	0	28	9999999	103.54	62.97	3	2	2	1	2	2	1	2	2	2	2		0	0	2	0	1900-01-02	2	2	1	2014-07-01	196	1	2013-12-10
4509	0	2013-12-10	2013-12-23	27	163	53	19.95	3TC+EFV600+TDF	0	2	0	0	2		1	2	2	1	2	2	0	13	9999999	70.8	87.97	4	2	2	1	2	2	1	2	2	2	2		0	0	2	0	1900-01-02	2	2	1	2014-07-01	190	1	2013-12-10
451	1	2005-05-17	2013-07-26	41	170	70	24.22	3TC+D4T30+NVP	1	1	0	0	2		1	2	2	1	2	2	9	725	0	111.15	76.69	3	1	9	2	0	0	0	0	0	0	2		0	0	2	0	1900-01-02	2	2	1	2014-07-01	340	3	2005-05-17
4513	1	2013-12-12	2013-12-23	50	170	54	18.69	3TC+EFV600+TDF	0	2	0	0	2		1	2	2	1	2	2	0	97	9999999	84.96	70.36	3	2	9	1	2	2	1	2	2	2	2		0	0	2	0	1900-01-02	2	2	2	2014-05-19	147	1	2013-12-12
4516	0	2013-12-17	2013-12-31	44	148	44	20.09	3TC+EFV600+TDF	0	2	0	0	2		1	2	2	1	2	2	0	129	9999999	37.2	118.09	2	2	9	1	2	2	1	2	2	2	2		0	0	2	0	1900-01-02	2	2	1	2014-07-01	182	2	2013-12-17
471	0	2005-05-25	2013-06-18	44	163	52	19.57	3TC+D4T30+NVP	1	1	0	0	2		1	2	2	1	2	2	0	495	0	69.91	74.26	3	2	2	2	0	0	0	0	0	0	2		0	0	2	0	1900-01-02	2	2	1	2014-07-01	378	3	2005-05-24
472	1	2005-05-25	2012-07-24	39	169	65	22.76	3TC+D4T30+NVP	1	1	0	0	2		1	2	2	1	2	2	9	396	0	94.69	85.28	4	2	9	1	2	2	1	2	2	2	2		0	0	2	0	1900-01-02	2	2	2	2014-04-20	635	3	2005-06-06
476	1	2005-05-26	2013-12-24	18	153	48	20.5	3TC+D4T30+NVP	1	1	0	0	2		1	2	2	1	2	2	0	868	0	60.18	119.69	3	9	9	2	0	0	0	0	0	0	2		0	0	2	0	1900-01-02	2	2	1	2014-07-01	189	3	2005-07-13
486	1	2005-06-01	2013-06-24	34	160	63	24.61	3TC+D4T30+EFV600	1	1	0	0	2		1	2	2	1	2	2	0	850	0	94.69	86.75	3	9	9	2	0	0	0	0	0	0	2		0	0	2	0	1900-01-02	2	2	1	2014-07-01	372	3	2005-06-01
487	1	2005-06-02	2013-05-29	43	172	57	19.27	3TC+D4T30+EFV600	1	1	0	0	2		1	2	2	1	2	2	0	189	0	84.96	80.05	4	9	2	1	2	2	1	2	2	2	2		0	0	2	0	1900-01-02	2	2	1	2014-07-01	398	2	2005-06-02
493	1	2005-06-03	2012-08-23	46	161	49	18.9	3TC+D4T30+NVP	1	1	0	0	2		1	2	2	1	2	2	9	824	0	74.34	76.21	4	2	2	2	0	0	0	0	0	0	2		0	0	2	0	1900-01-02	2	2	1	2014-07-01	677	3	2005-06-03
505	1	2005-06-09	2012-10-01	36	159	56	22.15	3TC+D4T30+NVP	1	1	0	0	2		2	0	0	0	0	0	9	481	0	74.34	96.36	3	2	1	2	0	0	0	0	0	0	2		0	0	2	0	1900-01-02	2	2	1	2014-07-01	638	3	2005-07-15
522	1	2005-06-14	2012-08-07	33	165	56	20.57	3TC+D4T30+EFV600	1	1	0	0	2		1	2	2	1	2	2	0	395	0	75.22	97.98	4	9	9	1	2	2	1	2	2	2	2		0	0	2	0	1900-01-02	2	2	1	2014-07-01	693	3	2005-06-14
526	1	2005-06-15	2013-12-26	42	160	63	24.61	3TC+D4T30+NVP	1	1	0	0	2		1	2	2	1	1	2	0	499	9999999	70.8	107.26	3	9	9	2	0	0	0	0	0	0	2		0	0	2	0	1900-01-02	2	2	1	2014-07-01	187	3	2005-06-15
533	1	2005-06-21	2013-05-02	15	156	43	17.67	3TC+D4T30+NVP	1	1	0	0	2		1	1	2	2	1	2	9	882	0	77.88	84.89	3	9	9	2	0	0	0	0	0	0	2		0	0	2	0	1900-01-02	2	2	1	2014-07-01	425	3	2005-06-20
534	1	2005-06-22	2012-08-20	47	155	50	20.81	3TC+D4T30+NVP	1	1	0	0	2		1	2	2	1	2	2	9	257	0	99.12	57.7	3	9	9	1	2	2	1	2	2	2	2		0	0	2	0	1900-01-02	2	2	2	2012-11-11	83	3	2005-06-22
539	0	2005-06-24	2012-10-19	49	156	58	23.83	3TC+D4T30+NVP	1	1	0	0	2		1	2	2	1	2	2	9	477	0	65.49	83.82	3	9	2	2	0	0	0	0	0	0	2		0	0	2	0	1900-01-02	2	2	1	2014-07-01	620	3	2005-06-24
543	0	2005-06-27	2012-07-18	40	155	66	27.47	3TC+D4T30+EFV600	1	1	0	0	2		1	2	2	1	2	2	0	710	0	79.65	86.18	4	2	9	2	0	0	0	0	0	0	2		0	0	2	0	1900-01-02	2	2	1	2014-07-01	713	3	2005-06-17
549	0	2005-06-28	2013-08-06	37	161	53	20.45	3TC+D4T30+NVP	1	1	0	0	2		1	2	2	1	2	2	0	825	0	73.45	77.3	2	2	9	2	0	0	0	0	0	0	2		0	0	2	0	1900-01-02	2	2	1	2014-07-01	329	3	2005-07-12
560	1	2005-07-05	2013-03-01	31	160	59	23.05	3TC+D4T30+NVP	1	1	0	0	2		1	2	2	1	2	2	0	532	0	96.47	82	3	9	9	2	0	0	0	0	0	0	2		0	0	2	0	1900-01-02	2	2	1	2014-07-01	487	3	2005-07-04
562	1	2005-07-05	2012-08-24	39	172	63	21.3	3TC+D4T30+EFV600	1	1	0	0	2		1	2	2	1	2	2	0	745	0	91.15	85.86	3	9	2	2	0	0	0	0	0	0	2		0	0	2	0	1900-01-02	2	2	1	2014-07-01	676	3	2005-07-21
566	0	2005-07-06	2012-12-31	33	150	47	20.89	3TC+D4T30+NVP	1	1	0	0	2		1	2	2	1	2	2	9	278	9999999	107.97	48.44	3	2	9	1	2	2	1	2	2	2	2		0	0	2	0	1900-01-02	2	2	1	2014-07-01	547	3	2005-06-06
57	1	2004-10-21	2012-09-19	44	174	60	19.82	3TC+D4T+NVP	1	1	0	0	2		1	2	2	1	2	2	9	503	0	122.13	58.01	3	1	9	2	0	0	0	0	0	0	2		0	0	2	0	1900-01-02	2	2	1	2014-07-01	650	3	2004-11-01
587	1	2005-07-18	2013-09-02	39	160	56	21.88	3TC+D4T30+NVP	1	1	0	0	2		1	2	2	1	2	2	0	411	156	88.5	78.61	3	2	9	1	2	2	1	2	2	2	1	hydronephrosis	0	0	2	0	1900-01-02	2	2	1	2014-07-01	302	3	2005-07-15
598	0	2005-07-26	2012-09-26	43	152	63	27.27	3TC+D4T30+NVP	1	1	0	0	2		1	2	2	1	2	2	9	521	0	92.92	68.4	3	9	2	2	0	0	0	0	0	0	2		0	0	2	0	1900-01-02	2	2	1	2014-07-01	643	3	2008-04-30
606	0	2005-08-03	2012-12-26	38	153	54	23.07	3TC+D4T30+NVP	1	1	0	0	2		1	2	2	1	2	2	0	633	0	44.25	129.45	3	2	9	2	0	0	0	0	0	0	2		0	0	2	0	1900-01-02	2	2	1	2014-07-01	552	3	2005-08-03
61	1	2004-11-29	2013-08-21	42	105	54	48.98	3TC+D4T30+NVP	1	1	0	0	2		1	2	2	1	2	2	9	251	0	89.38	72.83	4	2	9	1	2	2	1	2	2	2	2		0	0	2	0	1900-01-02	2	2	1	2014-07-01	314	3	2004-12-07
618	0	2005-08-12	2013-09-11	42	157	61	24.75	3TC+D4T30+NVP	1	1	0	0	2		1	2	2	1	2	2	1	541	0	61.95	100.36	2	1	2	2	0	0	0	0	0	0	2		0	0	2	0	1900-01-02	2	2	1	2014-07-01	293	3	2005-08-12
622	1	2005-08-15	2013-11-12	47	164	47	17.47	3TC+D4T30+NVP	1	1	0	0	2		1	2	2	1	2	2	0	877	0	71.68	75	3	9	9	2	0	0	0	0	0	0	2		0	0	2	0	1900-01-02	2	2	1	2014-07-01	231	3	2005-07-29
625	1	2005-08-16	2013-07-26	46	156	49	20.13	3TC+D4T30+NVP	1	1	1	0	2		1	2	2	1	2	2	0	513	0	80.53	70.35	3	2	2	2	0	0	0	0	0	0	2		0	1	2	0	1900-01-02	2	2	1	2014-07-01	340	3	2005-08-15
628	0	2005-08-16	2012-10-16	41	146	47	22.05	3TC+D4T30+EFV600	1	1	0	0	2		1	2	2	1	2	2	9	619	0	69.03	70.1	3	9	9	2	0	0	0	0	0	0	2		0	0	2	0	1900-01-02	2	2	1	2014-07-01	623	3	2005-08-15
630	0	2005-08-16	2013-11-26	53	152	41	17.75	3TC+D4T30+NVP	1	1	0	0	2		1	2	2	1	2	2	9	385	9999999	70.8	52.4	2	9	2	2	0	0	0	0	0	0	2		0	0	2	0	1900-01-02	2	2	1	2014-07-01	217	3	2005-08-15
635	1	2005-08-17	2012-03-23	38	156	43	17.67	3TC+D4T30+EFV600	1	1	0	0	2		1	2	2	1	1	2	9	354	9999999	106.2	50.8	4	9	9	2	0	0	0	0	0	0	2		0	0	2	0	1900-01-02	2	2	6	2014-07-01	830	3	2005-08-16
640	0	2005-08-18	2012-09-03	35	152	48.5	20.99	3TC+D4T30+NVP	1	1	0	0	2		1	2	2	1	1	2	0	549	9999999	83.19	63.66	4	2	9	2	0	0	0	0	0	0	2		0	0	2	0	1900-01-02	2	2	1	2014-07-01	666	3	2005-08-17
641	0	2005-08-18	2012-07-23	17	164	50	18.59	3TC+D4T30+NVP	1	1	0	0	2		1	2	2	1	2	2	9	889	0	59.3	107.86	3	9	9	1	2	2	1	2	2	2	2		0	0	2	0	1900-01-02	2	2	1	2014-07-01	708	3	2005-08-17
644	1	2005-08-19	2013-06-24	38	159	58	22.94	3TC+D4T30+EFV600	1	1	0	0	2		1	2	2	1	2	2	0	909	0	70.8	102.78	3	9	9	2	0	0	0	0	0	0	2		0	0	2	0	1900-01-02	2	2	1	2014-07-01	372	3	2005-08-04
657	1	2005-08-24	2013-03-20	39	166	60	21.77	3TC+D4T30+EFV600	1	1	0	0	2		1	2	2	1	2	2	1	405	0	69.03	107.98	4	1	9	1	2	2	1	2	2	2	2		0	0	2	0	1900-01-02	2	2	1	2014-07-01	468	3	2005-09-07
659	1	2005-08-26	2013-01-25	47	167	65	23.31	3TC+D4T30+NVP	1	1	0	0	2		1	2	2	1	2	2	0	412	0	79.65	93.35	2	9	9	1	2	2	1	2	2	2	2		0	0	2	0	1900-01-02	2	2	2	2014-06-03	494	3	2005-09-05
663	1	2005-08-30	2012-07-12	43	163	50	18.82	3TC+D4T30+EFV600	1	1	0	0	2		1	2	2	1	2	2	9	359	9999999	60.18	99.13	3	2	1	1	2	2	1	2	2	2	2		0	0	2	0	1900-01-02	2	2	1	2014-07-01	719	3	2005-08-29
668	0	2005-09-05	2013-09-19	40	165	56	20.57	3TC+D4T30+NVP	1	1	0	0	2		1	2	2	1	2	2	9	1023	0	62.84	92.68	2	9	9	2	0	0	0	0	0	0	2		0	0	2	0	1900-01-02	2	2	1	2014-07-01	285	3	2005-09-02
67	1	2005-01-28	2012-01-05	42	166	64	23.23	3TC+D4T+NVP	1	1	0	0	2		1	2	2	1	1	2	0	460	0	90.2	85.53	4	2	2	2	0	0	0	0	0	0	2		0	0	2	0	1900-01-02	2	2	1	2014-07-01	908	3	2005-01-28
671	1	2005-09-06	2013-10-10	52	162	52	19.81	3TC+D4T30+NVP	1	1	0	0	2		1	2	2	1	2	2	0	546	0	109.74	51.29	3	9	9	2	0	0	0	0	0	0	2		0	0	2	0	1900-01-02	2	2	1	2014-07-01	264	3	2005-09-23
673	1	2005-09-09	2013-03-28	38	160	52	20.31	3TC+D4T30+NVP	1	1	1	0	2		1	2	2	1	2	2	0	686	0	65.49	99.62	3	9	9	2	0	0	0	0	0	0	2		0	1	2	0	1900-01-02	2	2	1	2014-07-01	460	3	2005-09-29
677	0	2005-09-12	2013-12-23	29	159	55	21.76	3TC+D4T30+NVP	1	1	0	0	2		1	2	2	1	2	2	9	667	0	88.5	71.74	2	9	9	2	0	0	0	0	0	0	2		0	0	2	0	1900-01-02	2	2	1	2014-07-01	190	3	2005-09-08
681	0	2005-09-13	2013-08-08	35	158	55	22.03	3TC+D4T30+EFV600	1	1	0	0	2		1	2	2	1	2	2	9	1170	0	77	78	3	9	9	2	0	0	0	0	0	0	2		1	0	2	0	1900-01-02	2	2	1	2014-07-01	327	3	2005-10-26
686	1	2005-09-15	2013-11-18	36	169	60	21.01	3TC+D4T30+EFV600	1	1	0	0	2		1	2	2	1	1	2	0	417	0	72.27	106.2	4	9	9	2	0	0	0	0	0	0	2		0	0	2	0	1900-01-02	2	2	1	2014-07-01	225	3	2005-09-15
688	1	2005-09-16	2013-09-19	40	161	65	25.08	3TC+D4T30+NVP	1	1	0	0	2		1	2	2	1	2	2	9	429	0	120.36	66.43	4	9	9	2	0	0	0	0	0	0	2		0	0	2	0	1900-01-02	2	2	1	2014-07-01	285	3	2005-09-16
690	0	2005-09-16	2013-03-29	36	155	53	22.06	3TC+D4T30+NVP	1	1	0	0	2		1	2	2	1	2	2	0	936	0	40.71	140.81	3	2	9	2	0	0	0	0	0	0	2		1	1	2	0	1900-01-02	2	2	1	2014-07-01	459	3	2005-09-15
697	1	2005-09-20	2012-10-16	44	161	54	20.83	3TC+D4T30+EFV600	1	1	0	0	2		1	2	2	1	2	2	0	528	0	60.18	105.95	4	9	9	2	0	0	0	0	0	0	2		0	0	2	0	1900-01-02	2	2	1	2014-07-01	623	3	2005-09-19
702	0	2005-09-22	2013-09-04	33	160	57	22.27	3TC+EFV600+TDF	0	2	0	0	2		1	2	2	1	2	2	0	264	9999999	105.31	60.23	2	2	9	2	0	0	0	0	0	0	2		0	0	2	0	1900-01-02	2	2	1	2014-07-01	300	3	2005-09-21
714	1	2005-09-27	2013-11-11	40	172	52	17.58	3TC+D4T30+EFV600	1	1	0	0	2		1	2	2	1	2	2	0	451	0	89.39	71.55	4	9	9	2	0	0	0	0	0	0	2		0	0	2	0	1900-01-02	2	2	1	2014-07-01	232	3	2005-08-27
721	0	2005-09-29	2012-11-29	38	153	50	21.36	3TC+D4T30+NVP	1	1	0	0	2		1	2	2	1	2	2	0	630	0	67.26	78.86	3	2	9	2	0	0	0	0	0	0	2		0	0	2	0	1900-01-02	2	2	1	2014-07-01	579	3	2005-09-28
722	1	2005-09-29	2013-01-30	44	164	59	21.94	3TC+D4T40+NVP	1	1	0	0	2		1	2	2	1	2	2	0	584	0	84.96	82	4	9	9	1	2	2	1	2	2	2	2		0	0	2	0	1900-01-02	2	2	1	2014-07-01	517	3	2005-09-28
728	0	2005-10-03	2012-01-12	36	153	48	20.5	3TC+D4T30+EFV600	1	1	0	0	2		1	2	2	1	2	2	9	596	0	101.7	51.05	4	9	9	2	0	0	0	0	0	0	2		0	0	2	0	1900-01-02	2	2	1	2014-07-01	901	3	2005-09-30
732	0	2005-10-06	2013-01-17	35	154	57	24.03	3TC+D4T30+NVP	1	1	0	0	2		1	2	2	1	1	2	0	748	0	86.37	72.07	3	2	9	2	0	0	0	0	0	0	2		0	0	2	0	1900-01-02	2	2	1	2014-07-01	530	3	2005-10-03
738	0	2005-10-12	2012-12-20	53	152	52	22.51	3TC+D4T30+NVP	1	1	0	0	2		1	2	2	1	1	2	0	539	0	79.65	59.07	2	2	2	2	0	0	0	0	0	0	2		0	0	2	0	1900-01-02	2	2	1	2014-07-01	558	3	2005-11-08
74	1	2004-08-19	2013-10-10	39	157	62	25.15	3TC+D4T+NVP	1	1	1	1	2		1	2	2	1	2	2	9	528	0	88.5	87.03	3	9	9	2	0	0	0	0	0	0	2		1	0	2	0	1900-01-02	2	2	1	2014-07-01	264	3	2004-10-12
743	1	2005-10-18	2012-07-11	36	159	54	21.36	3TC+D4T30+EFV600	1	1	0	0	2		1	2	2	1	2	2	0	923	0	118.54	58.27	3	9	9	2	0	0	0	0	0	0	2		0	0	2	0	1900-01-02	2	2	1	2014-07-01	720	3	2005-10-18
750	0	2005-10-21	2012-08-28	14	148	43	19.63	3TC+D4T30+EFV600	1	1	0	0	2		1	2	2	1	2	2	0	692	0	63.73	88.42	3	2	9	2	0	0	0	0	0	0	2		0	0	2	0	1900-01-02	2	2	1	2014-07-01	672	3	2005-10-20
755	0	2005-10-24	2013-05-16	35	157	47	19.07	3TC+EFV600+TDF	0	2	0	0	2		1	2	2	1	2	2	0	59	9999999	80.5	63.76	4	2	9	1	2	2	1	2	2	2	2		0	0	2	0	1900-01-02	2	2	1	2014-07-01	411	1	2005-10-24
758	1	2005-10-25	2013-11-19	39	176	61	19.69	3TC+D4T30+NVP	1	1	0	0	2		1	2	2	1	2	2	9	656	0	138.06	54.89	3	9	2	2	0	0	0	0	0	0	2		0	0	2	0	1900-01-02	2	2	1	2014-07-01	224	3	2005-10-20
76	1	2004-12-22	2012-10-18	41	164	63	23.42	3TC+D4T30+NVP	1	2	0	0	2		1	2	2	1	1	2	9	626	0	72.57	105.71	3	2	9	2	0	0	0	0	0	0	2		0	1	2	0	1900-01-02	2	2	1	2014-07-01	621	3	2005-01-18
760	0	2005-10-26	2013-01-23	48	153	49.5	21.15	3TC+D4T30+EFV600	1	1	1	0	2		1	2	2	1	2	2	0	348	0	64.14	73.84	3	2	9	2	0	0	0	0	0	0	2		0	1	2	0	1900-01-02	2	2	1	2014-07-01	524	3	2005-10-24
761	1	2005-10-27	2013-06-24	36	164	74	27.51	3TC+D4T30+NVP	1	1	0	0	2		1	2	2	1	2	2	9	1296	9999999	91.16	103.84	3	2	2	2	0	0	0	0	0	0	2		0	0	2	0	1900-01-02	2	2	1	2014-07-01	372	3	2005-10-27
769	0	2005-11-01	2013-01-22	18	148	40	18.26	3TC+D4T30+EFV600	1	1	0	0	2		1	2	2	1	2	2	1	523	0	48.67	104.28	4	1	9	2	0	0	0	0	0	0	2		0	0	2	0	1900-01-02	2	2	1	2014-07-01	525	3	2005-11-17
77	1	2005-01-18	2013-07-25	47	161	48	18.52	3TC+D4T30+NVP	1	1	0	0	2		1	2	2	1	2	2	0	569	0	79.65	68.94	3	9	9	2	0	0	0	0	0	0	2		0	0	2	0	1900-01-02	2	2	1	2014-07-01	341	3	2005-01-18
770	1	2005-11-01	2013-12-17	22	160	62	24.22	3TC+D4T30+NVP	1	1	0	0	2		1	2	2	1	2	2	0	310	0	53.1	169.47	4	9	9	1	2	2	1	2	2	2	2		0	0	2	0	1900-01-02	2	2	1	2014-07-01	196	3	2005-11-14
780	0	2005-11-07	2012-12-03	33	163	51	19.2	3TC+D4T30+EFV600	1	1	0	0	2		1	2	2	1	2	2	9	541	0	69.03	82.21	3	9	9	2	0	0	0	0	0	0	2		0	0	2	0	1900-01-02	2	2	1	2014-07-01	575	3	2006-10-23
783	1	2005-11-08	2012-07-23	38	165	51	18.73	3TC+D4T30+NVP	1	1	1	0	2		1	2	2	1	2	2	9	196	0	56.64	112.97	2	2	9	1	2	2	1	2	2	2	2		0	1	2	0	1900-01-02	2	2	1	2014-07-01	708	2	2005-11-08
784	0	2005-11-08	2013-09-19	36	156	49	20.13	3TC+AZT+NVP	1	1	0	0	2		1	2	2	1	2	2	9	643	0	67.26	78.8	2	9	9	2	0	0	0	0	0	0	2		0	0	2	0	1900-01-02	2	2	1	2014-07-01	285	3	2005-11-07
786	1	2005-11-09	2013-01-23	48	156	48	19.72	3TC+D4T30+EFV600	1	1	0	0	2		1	2	2	1	2	2	0	370	0	78.76	68.96	3	9	9	2	0	0	0	0	0	0	2		0	0	2	0	1900-01-02	2	2	6	2014-07-01	524	3	2005-11-08
788	1	2005-11-09	2013-05-27	47	157	60	24.34	3TC+EFV600+TDF	0	2	0	0	2		1	2	2	1	2	2	0	707	9999999	92.93	73.86	2	2	9	2	0	0	0	0	0	0	2		0	0	2	0	1900-01-02	2	2	1	2014-07-01	400	3	2005-11-09
790	1	2005-11-10	2012-10-22	43	156	54	22.19	3TC+D4T30+NVP	1	1	0	0	2		1	2	2	1	2	2	9	736	0	76.11	84.65	3	2	2	2	0	0	0	0	0	0	2		0	0	2	0	1900-01-02	2	2	1	2014-07-01	617	3	2005-12-02
791	1	2005-11-11	2013-09-26	31	160	51	19.92	3TC+EFV600+TDF	0	2	0	0	2		1	2	2	1	2	2	0	23	9999999	82.31	83.07	3	2	9	1	2	2	1	2	2	2	2		0	0	2	0	1900-01-02	2	2	1	2014-07-01	278	1	2008-03-26
793	1	2005-11-11	2012-08-24	21	155	50	20.81	3TC+D4T30+NVP	1	1	0	0	2		1	2	2	1	2	2	9	208	0	85.84	85.26	3	2	9	1	2	2	1	2	2	2	2		0	0	2	0	1900-01-02	2	2	1	2014-07-01	676	3	2005-11-14
794	0	2005-11-16	2012-05-30	40	150	43	19.11	3TC+D4T30+NVP	1	1	0	0	2		1	2	2	1	2	2	0	385	9999999	75.2	59.47	4	2	2	2	0	0	0	0	0	0	2		0	0	2	0	1900-01-02	2	2	1	2014-07-01	762	3	2005-11-16
804	0	2005-11-18	2013-01-25	61	144	44	21.22	3TC+D4T30+NVP	1	1	0	0	2		1	2	2	1	2	2	0	934	0	45.13	80.1	3	2	2	2	0	0	0	0	0	0	2		0	0	2	0	1900-01-02	2	2	1	2014-07-01	522	3	2008-11-24
817	0	2005-11-28	2012-07-24	41	163	63	23.71	3TC+D4T30+EFV600	1	1	0	0	2		1	2	2	1	2	2	0	1250	0	104.43	62.11	4	2	9	2	0	0	0	0	0	0	2		0	0	2	0	1900-01-02	2	2	1	2014-07-01	707	3	2008-02-28
818	0	2005-11-28	2012-09-24	34	161	49	18.9	3TC+D4T30+NVP	1	1	0	0	2		1	2	2	1	2	2	0	789	0	60.13	89.83	2	2	9	2	0	0	0	0	0	0	2		0	0	2	0	1900-01-02	2	2	1	2014-07-01	645	3	2005-11-28
819	0	2005-11-29	2013-01-23	56	146	47	22.05	3TC+D4T30+NVP	1	1	0	0	2		1	2	2	1	2	2	9	490	0	49.56	82.85	3	9	9	2	0	0	0	0	0	0	2		0	0	2	0	1900-01-02	2	2	1	2014-07-01	524	3	2005-09-28
821	0	2005-11-29	2013-01-28	47	158	47	18.83	3TC+D4T30+EFV600	1	1	0	0	2		1	2	2	1	2	2	0	464	0	74.34	61.15	3	2	9	2	0	0	0	0	0	0	2		0	0	2	0	1900-01-02	2	2	1	2014-07-01	519	3	2005-11-29
824	1	2005-11-30	2013-08-29	47	161	67	25.85	3TC+D4T30+NVP	1	1	1	0	2		1	2	2	1	2	2	0	500	0	114.16	67.13	3	9	9	2	0	0	0	0	0	0	2		0	0	2	0	1900-01-02	2	2	1	2014-07-01	306	3	2005-11-29
828	1	2005-12-02	2013-01-25	42	157	53	21.5	3TC+D4T30+NVP	1	1	1	0	2		1	2	2	1	1	2	0	433	0	119.47	53.47	4	9	9	1	2	2	1	2	2	2	2		0	1	2	0	1900-01-02	2	2	1	2014-07-01	522	3	2005-12-19
833	1	2005-12-07	2013-08-29	39	160	52	20.31	3TC+D4T30+NVP	1	1	0	0	2		1	2	2	1	2	2	9	410	0	94.69	68.22	3	9	9	2	0	0	0	0	0	0	2		0	0	2	0	1900-01-02	2	2	1	2014-07-01	306	3	2005-12-05
839	1	2005-12-08	2012-11-21	30	160	55	21.48	3TC+D4T30+NVP	1	1	0	0	2		1	2	2	1	1	2	9	459	0	94.69	78.59	2	9	9	2	0	0	0	0	0	0	2		0	0	2	0	1900-01-02	2	2	1	2014-07-01	587	3	2005-12-06
843	0	2005-12-09	2013-03-06	16	141	36	18.11	3TC+D4T30+NVP	1	1	0	0	2		1	2	2	1	2	2	1	906	0	57.52	80.71	2	1	9	2	0	0	0	0	0	0	2		0	0	2	0	1900-01-02	2	2	1	2014-07-01	482	3	2005-11-16
846	1	2005-12-13	2013-07-23	21	150	53	23.56	3TC+D4T30+NVP	1	1	0	0	2		1	2	2	1	2	2	0	638	0	92.92	83.49	3	9	9	2	0	0	0	0	0	0	2		0	0	2	0	1900-01-02	2	2	1	2014-07-01	343	3	2006-01-13
848	0	2005-12-13	2012-04-19	37	157	52	21.1	3TC+D4T30+NVP	1	1	0	0	2		1	2	2	1	2	2	0	967	9999999	76.1	73.2	3	2	9	2	0	0	0	0	0	0	2		0	0	2	0	1900-01-02	2	2	1	2014-07-01	803	3	2005-12-09
849	0	2005-12-13	2012-05-29	53	151	49	21.49	3TC+D4T30+EFV600	1	1	0	0	2		1	2	2	1	2	2	0	263	0	61.95	71.57	4	2	9	1	2	2	1	2	2	2	2		0	0	2	0	1900-01-02	2	2	1	2014-07-01	763	3	2005-12-12
850	0	2005-12-14	2012-06-04	24	150	41	18.22	3TC+D4T30+NVP	1	1	0	0	2		2	0	0	0	0	0	0	637	9999999	61.06	81.01	3	2	9	2	0	0	0	0	0	0	2		0	0	2	0	1900-01-02	2	2	1	2014-07-01	757	3	2005-12-14
851	0	2005-12-14	2013-07-25	33	152	44	19.04	3TC+D4T30+EFV600	1	1	0	0	2		1	2	2	1	2	2	9	377	0	85.84	57.04	4	9	9	2	0	0	0	0	0	0	2		0	0	2	0	1900-01-02	2	2	1	2014-07-01	341	3	2005-12-13
852	1	2005-12-15	2013-08-07	38	165	51	18.73	3TC+D4T30+NVP	1	1	0	0	2		1	2	2	1	2	2	0	610	0	73.45	87.11	3	9	9	2	0	0	0	0	0	0	2		0	0	2	0	1900-01-02	2	2	1	2014-07-01	328	3	2005-12-13
86	1	2004-10-25	2012-08-24	45	171	58	19.84	3TC+D4T+NVP	1	1	0	0	2		1	2	2	1	2	2	9	607	0	100.89	67.18	3	1	9	2	0	0	0	0	0	0	2		0	0	2	0	1900-01-02	2	2	1	2014-07-01	676	3	2004-11-08
860	1	2005-12-21	2013-04-03	29	162	50	19.05	3TC+D4T30+EFV600	1	1	0	0	2		1	2	2	1	2	2	0	426	9999999	81.42	83.84	3	9	9	2	0	0	0	0	0	0	2		0	0	2	0	1900-01-02	2	2	1	2014-07-01	454	3	2005-12-19
861	1	2005-12-21	2012-12-26	34	164	53	19.71	3TC+D4T30+NVP	1	1	0	0	2		1	2	2	1	2	2	9	454	0	76.11	90.79	4	2	9	2	0	0	0	0	0	0	2		0	0	2	0	1900-01-02	2	2	1	2014-07-01	552	3	2005-12-19
862	0	2005-12-21	2012-11-22	33	148	46	21	3TC+D4T30+EFV600	1	1	0	0	2		1	2	2	1	2	2	9	684	9999999	69.9	73.23	3	9	9	2	0	0	0	0	0	0	2		0	0	2	0	1900-01-02	2	2	1	2014-07-01	586	3	2006-11-28
863	1	2005-12-21	2013-09-09	34	166	58	21.05	3TC+D4T30+NVP	1	1	0	0	2		1	2	2	1	2	2	9	342	0	132.75	56.96	2	9	9	1	2	2	1	2	2	2	2		0	0	2	0	1900-01-02	2	2	1	2014-07-01	295	3	2006-01-16
865	1	2005-12-22	2013-07-04	50	171	53	18.13	3TC+D4T30+NVP	1	1	0	0	2		1	2	2	1	2	2	0	233	0	86.73	67.65	4	9	9	1	2	2	1	2	2	2	2		0	0	2	0	1900-01-02	2	2	1	2014-07-01	362	3	2005-12-20
878	1	2006-01-05	2013-02-20	16	150	43	19.11	3TC+D4T30+NVP	1	1	0	0	2		1	2	2	1	2	2	1	850	0	61.06	107.41	3	1	9	2	0	0	0	0	0	0	2		0	0	2	0	1900-01-02	2	2	1	2014-07-01	496	3	2008-04-24
89	1	2004-10-26	2012-11-26	35	170	74	25.61	3TC+D4T30+NVP	1	1	1	0	2		1	2	2	1	1	2	0	866	0	104.43	91.52	3	9	9	2	0	0	0	0	0	0	2		0	0	2	0	1900-01-02	2	2	1	2014-07-01	582	3	2004-10-22
896	1	2006-01-20	2013-01-23	38	175	56	18.29	3TC+D4T30+EFV600	1	1	1	0	2		1	2	2	1	2	2	0	408	0	69.91	100.5	3	9	2	2	0	0	0	0	0	0	2		0	1	2	0	1900-01-02	2	2	1	2014-07-01	524	3	2006-01-20
898	1	2006-01-23	2013-07-16	45	158	54	21.63	3TC+D4T30+EFV600	1	1	1	0	2		2	0	0	0	0	0	0	785	0	70.8	89.12	4	9	9	2	0	0	0	0	0	0	2		0	1	2	0	1900-01-02	2	2	1	2014-07-01	350	3	2006-01-24
900	1	2006-01-23	2012-12-14	39	170	58	20.07	EFV600+FTC+TDF	0	2	9	0	9		2	0	0	0	0	0	0	563	9999999	76.5	94.19	3	2	9	2	0	0	0	0	0	0	2		0	0	2	0	1900-01-02	2	2	1	2014-07-01	564	3	2006-01-18
903	0	2006-01-24	2013-09-19	34	155	52	21.64	3TC+D4T30+EFV600	1	1	0	0	9		1	2	2	1	2	2	9	514	0	77	74.45	3	9	9	2	0	0	0	0	0	0	2		0	0	2	0	1900-01-02	2	2	1	2014-07-01	285	3	2006-01-23
907	1	2006-01-25	2012-12-18	33	158	55	22.03	3TC+D4T30+NVP	1	1	0	0	2		1	2	2	1	2	2	0	817	0	77.88	92.94	3	9	9	2	0	0	0	0	0	0	2		0	0	2	0	1900-01-02	2	2	1	2014-07-01	560	3	2006-01-23
919	1	2006-01-31	2012-12-20	33	162	53	20.2	3TC+D4T30+EFV600	1	1	1	0	2		1	2	2	1	2	2	9	637	0	98.23	71.01	3	2	9	2	0	0	0	0	0	0	2		0	0	2	0	1900-01-02	2	2	1	2014-07-01	558	3	2006-02-20
923	1	2006-02-02	2012-08-27	51	164	55	20.45	3TC+AZT+NVP	1	1	0	0	2		1	2	2	1	2	2	0	680	0	96.46	62.42	3	9	9	2	0	0	0	0	0	0	2		0	0	2	0	1900-01-02	2	2	1	2014-07-01	673	3	2007-11-29
925	0	2006-02-02	2012-08-31	36	150	46	20.44	EFV600+FTC+TDF	0	2	9	0	9		1	2	2	1	2	2	0	408	9999999	84.1	59.16	2	2	9	1	2	2	1	2	2	2	2		0	0	2	0	1900-01-02	2	2	6	2014-07-01	669	3	2006-01-24
935	0	2006-02-08	2012-10-16	48	154	50	21.08	3TC+D4T30+NVP	1	1	0	0	2		1	2	2	1	2	2	0	836	0	75.22	63.6	3	2	9	2	0	0	0	0	0	0	2		0	0	2	0	1900-01-02	2	2	1	2014-07-01	623	3	2006-03-13
941	1	2006-02-10	2013-01-30	34	166	51	18.51	3TC+D4T30+NVP	1	1	0	0	2		1	2	2	1	2	2	9	584	0	104.4	63.69	2	9	9	2	0	0	0	0	0	0	2		0	0	2	0	1900-01-02	2	1	3	2013-05-14	104	3	2006-02-08
944	1	2006-02-14	2013-05-21	31	169	58	20.31	3TC+EFV600+TDF	0	2	9	0	9		1	2	2	1	2	2	0	428	9999999	101.7	76.46	2	2	9	1	2	2	1	2	2	2	2		0	0	2	0	1900-01-02	2	2	1	2014-07-01	406	3	2006-02-13
949	0	2006-02-20	2013-05-29	45	150	48	21.33	3TC+D4T30+EFV600	1	1	0	0	2		1	2	2	1	2	2	0	795	0	72.57	65.35	4	2	9	2	0	0	0	0	0	0	2		0	0	2	0	1900-01-02	2	2	1	2014-07-01	398	3	2006-02-27
953	0	2006-02-22	2013-07-23	40	159	59	23.34	3TC+D4T30+NVP	1	1	1	0	9		1	2	2	1	2	2	0	651	0	62.84	97.64	3	2	9	2	0	0	0	0	0	0	2		0	1	2	0	1900-01-02	2	2	1	2014-07-01	343	3	2006-02-22
959	0	2006-02-27	2013-09-03	44	149	63	28.38	3TC+D4T30+NVP	1	1	0	0	2		1	2	2	1	2	2	0	361	0	66.38	94.76	2	2	9	1	2	2	1	2	2	2	2		0	0	2	0	1900-01-02	2	2	1	2014-07-01	301	3	2006-02-14
969	1	2006-03-02	2013-03-27	35	159	43	17.01	3TC+D4T30+EFV600	1	1	0	0	2		1	2	2	1	2	2	9	826	0	106.2	52.29	3	2	9	2	0	0	0	0	0	0	2		0	0	2	0	1900-01-02	2	2	1	2014-07-01	461	3	2006-03-02
974	0	2006-03-03	2012-10-18	41	169	49	17.16	3TC+D4T30+NVP	1	1	0	0	2		1	2	2	1	2	2	0	452	0	62.84	80.28	3	2	2	1	2	2	1	2	2	2	2		0	0	2	0	1900-01-02	2	2	1	2014-07-01	621	3	2006-03-03
98	1	2004-11-17	2012-09-04	46	172	57	19.27	3TC+D4T30+EFV600	1	1	0	0	1	SCC urethra	1	2	2	1	2	2	0	197	9999999	91.16	72.29	3	9	9	1	2	2	1	2	2	2	1	SCC urethra	0	0	1	1	2013-05-27	1	2	4	2013-08-01	331	2	2004-11-25
981	1	2006-03-07	2012-12-28	38	156	50	20.55	3TC+D4T30+EFV600	1	1	0	0	2		1	2	2	1	2	2	0	210	0	89.38	70.18	4	9	1	1	2	2	1	2	2	2	2		0	0	2	0	1900-01-02	2	2	1	2014-07-01	550	3	2006-04-03
983	1	2006-03-08	2012-10-24	37	167	66	23.67	3TC+D4T30+EFV600	1	1	0	0	2		1	2	2	1	1	2	9	714	0	64.6	129.44	4	2	2	2	0	0	0	0	0	0	2		0	0	2	0	1900-01-02	2	2	1	2014-07-01	615	3	2006-03-15
988	0	2006-03-09	2013-10-23	39	160	55	21.48	3TC+D4T30+NVP	1	1	0	0	2		1	2	2	1	2	2	9	706	0	77	75.03	3	9	9	2	0	0	0	0	0	0	2		0	0	2	0	1900-01-02	2	2	1	2014-07-01	251	3	2006-03-07
992	1	2006-03-10	2012-09-25	28	157	52	21.1	3TC+D4T30+NVP	1	1	0	0	2		1	2	2	1	2	2	9	417	0	79.65	89.94	3	2	9	2	0	0	0	0	0	0	2		0	0	2	0	1900-01-02	2	2	1	2014-07-01	644	3	2006-03-13
994	0	2006-03-13	2012-12-26	36	154	48	20.24	3TC+D4T30+NVP	1	1	0	0	2		1	2	2	1	2	2	0	541	0	0	95.58	2	2	9	2	0	0	0	0	0	0	2		0	0	2	0	1900-01-02	2	2	1	2014-07-01	552	3	2006-03-09
K101	0	2008-03-25	2012-01-17	39	156	46	18.9	3TC+D4T30+EFV600	1	1	0	0	2		1	2	2	1	2	2	0	794	9999999	63.72	75.83	4	2	9	2	0	0	0	0	0	0	2		0	0	2	0	1900-01-02	2	2	1	2014-07-01	896	3	2008-03-23
K11	1	2004-08-16	2013-11-20	49	162	49	18.67	3TC+D4T30+NVP	1	1	0	0	2		1	2	2	1	2	2	0	444	9999999	77	71.23	3	9	9	2	0	0	0	0	0	0	2		0	0	2	0	1900-01-02	2	2	1	2014-07-01	223	3	2004-08-16
K110	1	2008-10-10	2013-06-24	38	164	63	23.42	3TC+D4T30+EFV600	1	1	0	0	2		1	2	2	1	1	2	0	934	0	123.9	63.79	4	9	9	2	0	0	0	0	0	0	2		0	0	2	0	1900-01-02	2	2	1	2014-07-01	372	3	2008-10-29
K111	1	2008-11-09	2013-03-19	32	167	59	21.16	3TC+D4T30+NVP	1	1	0	0	2		1	2	2	1	2	2	0	618	0	67.26	116.53	3	9	9	2	0	0	0	0	0	0	2		0	0	2	0	1900-01-02	2	2	1	2014-07-01	469	3	2008-12-06
K112	1	2008-11-11	2012-11-27	35	170	61	21.11	3TC+D4T30+EFV600	1	1	0	0	2		1	2	2	1	2	2	0	459	0	103.54	76.09	4	9	9	2	0	0	0	0	0	0	2		0	0	2	0	1900-01-02	2	2	1	2014-07-01	581	3	2008-11-21
K114	0	2009-01-01	2012-11-22	38	157	64	25.96	3TC+D4T30+EFV600	1	1	0	0	2		1	2	2	1	2	2	0	565	0	71.69	94.7	3	2	2	2	0	0	0	0	0	0	2		0	0	2	0	1900-01-02	2	2	1	2014-07-01	586	3	2009-01-10
K116	1	2009-03-15	2012-09-27	38	168	48	17.01	3TC+D4T30+NVP	1	1	0	0	2		1	2	2	1	2	2	0	687	0	100.89	59.69	3	2	9	2	0	0	0	0	0	0	2		0	0	2	0	1900-01-02	2	2	1	2014-07-01	642	3	2009-03-24
K118	1	2009-04-09	2013-05-16	39	167	55	19.72	3TC+D4T30+EFV600	1	1	0	0	2		1	2	2	1	2	2	0	611	0	107.97	63.28	4	9	9	1	2	2	2	1	2	2	2		0	0	2	0	1900-01-02	2	2	3	2013-10-28	165	3	2009-04-02
K119	0	2009-04-09	2013-08-20	40	160	54	21.09	3TC+EFV600+TDF	0	2	0	0	2		1	2	2	1	2	2	0	206	9999999	92	61.04	3	2	9	1	2	2	1	2	2	2	2		0	0	2	0	1900-01-02	2	1	3	2013-10-28	69	3	2009-04-24
K120	1	2009-04-09	2012-09-26	40	175	69	22.53	3TC+D4T30+NVP	1	1	0	0	2		1	2	2	1	2	2	0	310	176	83.19	102.02	3	2	9	1	2	2	1	2	2	2	2		0	0	2	0	1900-01-02	2	2	1	2014-07-01	643	3	2009-04-24
K127	1	2009-08-01	2013-11-19	53	154	53	22.35	3TC+D4T30+EFV600	1	1	0	0	2		2	0	0	0	0	0	0	503	0	114.16	49.68	3	9	9	2	0	0	0	0	0	0	2		0	0	2	0	1900-01-02	2	2	1	2014-07-01	224	3	2009-07-31
K13	1	2004-08-24	2012-08-06	51	168	57	20.2	3TC+D4T30+NVP	1	1	0	0	2		1	2	2	1	2	2	1	276	0	109.74	56.86	3	1	9	1	2	2	1	2	2	2	2		0	0	2	0	1900-01-02	2	2	1	2014-07-01	694	3	2004-09-01
K23	1	2005-03-10	2012-09-26	47	161	55	21.22	3TC+D4T30+NVP	1	1	1	0	2		1	2	2	1	2	2	9	1148	0	106.2	59.24	3	2	9	2	0	0	0	0	0	0	2		0	1	2	0	1900-01-02	2	2	1	2014-07-01	643	3	2005-03-10
K27	0	2005-03-23	2012-09-27	42	158	69	27.64	3TC+D4T30+NVP	1	1	1	0	2		1	2	2	1	2	2	9	826	0	81.42	86.37	3	9	9	2	0	0	0	0	0	0	2		0	0	2	0	1900-01-02	2	2	1	2014-07-01	642	3	2005-04-06
K32	1	2004-09-19	2012-10-19	39	171	59	20.18	3TC+D4T30+EFV600	1	1	0	0	2		1	2	2	1	2	2	9	416	0	82.3	89.06	4	9	9	1	2	2	1	2	2	2	2		0	0	2	0	1900-01-02	2	2	1	2014-07-01	620	3	2004-09-19
K38	0	2005-05-29	2012-05-09	44	148	42	19.17	3TC+D4T30+NVP	1	1	1	0	2		1	2	2	1	2	2	9	1268	0	999	999	3	2	9	2	0	0	0	0	0	0	2		0	1	2	0	1900-01-02	1	2	4	2014-04-19	710	3	2005-05-29
K48	1	2005-07-15	2013-01-18	31	172	57	19.27	3TC+D4T30+EFV600	1	1	0	0	2		1	2	2	1	2	2	0	776	0	82.3	92.86	4	9	9	2	0	0	0	0	0	0	2		0	0	2	0	1900-01-02	2	2	1	2014-07-01	529	3	2005-07-21
K52	1	2005-08-20	2013-05-06	48	169	61	21.36	3TC+D4T40+EFV600	1	1	1	0	2		1	2	2	1	2	2	0	403	0	110.62	62.4	4	9	9	2	0	0	0	0	0	0	2		0	1	2	0	1900-01-02	2	2	1	2014-07-01	421	3	2005-08-22
K54	0	2005-09-24	2013-11-28	47	155	48	19.98	3TC+D4T30+NVP	1	1	0	0	2		1	2	2	1	2	2	0	578	0	73.45	63.21	4	2	2	2	0	0	0	0	0	0	2		0	0	2	0	1900-01-02	2	2	1	2014-07-01	215	3	2005-10-08
K58	0	2005-10-28	2012-08-13	51	152	49	21.21	3TC+D4T30+EFV600	1	1	1	1	2		1	2	2	1	2	2	0	1172	0	67.26	67.43	3	2	9	2	0	0	0	0	0	0	2		1	1	2	0	1900-01-02	2	2	1	2014-07-01	687	3	2005-10-31
K62	1	2005-12-11	2013-08-29	41	168	56	19.84	3TC+D4T30+EFV600	1	1	1	0	2		1	2	2	1	2	2	0	468	0	97.35	70.05	3	9	9	2	0	0	0	0	0	0	2		0	1	2	0	1900-01-02	2	2	1	2014-07-01	306	3	2005-12-15
K76	0	2006-08-15	2013-07-26	40	151	42	18.42	3TC+D4T30+NVP	1	1	0	0	2		1	2	2	1	2	2	0	560	0	63.72	68.55	3	2	9	2	0	0	0	0	0	0	2		0	0	2	0	1900-01-02	2	2	1	2014-07-01	340	3	2006-08-28
K79	1	2006-11-10	2012-12-04	48	164	51	18.96	3TC+D4T30+EFV600	1	1	0	0	2		1	2	2	1	2	2	9	332	0	75.22	76.72	4	2	9	1	2	2	1	2	2	2	2		0	0	2	0	1900-01-02	2	2	1	2014-07-01	574	3	2006-12-12
K81	1	2007-02-16	2013-03-21	33	165	49	18	3TC+D4T30+EFV600	1	1	0	0	2		1	2	2	1	2	2	0	438	0	68.14	94.64	4	9	9	2	0	0	0	0	0	0	2		0	0	2	0	1900-01-02	2	2	1	2014-07-01	467	3	2007-01-18
K82	0	2007-03-01	2013-01-28	39	155	61	25.39	3TC+D4T30+EFV600	1	1	1	0	2		1	2	2	1	2	2	0	528	0	71.69	89.38	4	2	1	2	0	0	0	0	0	0	2		0	1	2	0	1900-01-02	2	2	1	2014-07-01	519	3	2007-04-06
K84	0	2007-04-07	2013-10-23	43	151	60	26.31	3TC+D4T30+NVP	1	1	1	0	2		1	2	2	1	1	2	9	786	0	73.45	82.41	3	9	9	2	0	0	0	0	0	0	2		0	1	2	0	1900-01-02	2	2	1	2014-07-01	251	3	2007-04-06
K87	1	2007-05-02	2013-06-17	51	170	68	23.53	3TC+EFV600+TDF	0	2	9	1	9		1	2	2	1	2	2	0	247	9999999	109.74	67.83	4	2	2	1	2	2	1	2	2	2	2		0	0	2	0	1900-01-02	2	2	1	2014-07-01	379	3	2009-01-27
K92	1	2007-07-15	2013-09-02	54	172	63	21.3	3TC+D4T30+EFV600	1	1	0	0	2		1	2	2	1	2	2	0	524	0	98.23	67.84	3	9	9	2	0	0	0	0	0	0	2		0	0	2	0	1900-01-02	2	2	1	2014-07-01	302	3	2007-09-04
K95	1	2007-09-25	2012-10-16	38	167	74	26.53	3TC+D4T30+NVP	1	1	0	0	2		1	2	2	1	2	2	9	833	0	66.37	139.88	3	2	2	2	0	0	0	0	0	0	2		0	0	2	0	1900-01-02	2	2	1	2014-07-01	623	3	2007-11-06
L11	0	2006-07-06	2012-08-23	37	155	56	23.31	3TC+D4T30+NVP	1	1	0	0	2		1	2	2	1	2	2	0	991	0	64.61	92.85	2	2	9	1	2	2	1	2	2	2	2		0	0	2	0	1900-01-02	2	2	1	2014-07-01	677	3	2008-08-07
L13	0	2006-08-24	2012-07-03	29	143	43	21.03	3TC+D4T30+NVP	1	1	0	0	2		1	2	2	1	2	2	0	637	0	97.3	51.02	3	2	2	2	0	0	0	0	0	0	2		0	0	2	0	1900-01-02	2	2	1	2014-07-01	728	3	2008-02-19
L23	0	2006-12-07	2012-09-27	33	153	62	26.49	3TC+AZT+NVP	1	1	0	0	2		2	0	0	0	0	0	0	550	0	77.88	88.59	3	2	9	2	0	0	0	0	0	0	2		0	0	2	0	1900-01-02	2	2	1	2014-07-01	642	3	2006-12-07
L3	0	2006-03-09	2012-04-10	43	157	48	19.47	3TC+D4T30+NVP	1	1	0	0	2		1	2	2	1	1	2	9	671	0	62	78.1	3	9	9	2	0	0	0	0	0	0	2		0	0	2	0	1900-01-02	2	2	1	2014-07-01	812	3	2006-03-09
S1	1	2005-08-30	2013-06-05	41	162	60	22.86	3TC+D4T30+NVP	1	1	0	0	2		1	2	2	1	1	2	0	396	0	84.96	86	3	9	9	2	0	0	0	0	0	0	2		0	0	2	0	1900-01-02	2	2	1	2014-07-01	391	3	2005-11-07
S105	0	2008-07-21	2013-10-23	46	159	63	24.92	3TC+D4T30+EFV600	1	1	0	0	2		1	2	2	1	2	2	0	257	0	93.81	65.65	4	2	9	1	2	2	1	2	2	2	2		0	0	2	0	1900-01-02	2	2	1	2014-07-01	251	3	2008-07-25
S119	1	2009-01-07	2012-08-23	46	173	68	22.72	3TC+D4T30+NVP	1	1	0	0	2		1	2	2	1	1	2	9	654	0	110.62	71.07	3	1	2	2	0	0	0	0	0	0	2		0	0	2	0	1900-01-02	2	2	1	2014-07-01	677	3	2009-01-16
S127	0	2009-03-03	2013-06-24	25	148	41	18.72	3TC+D4T30+NVP	1	1	0	0	2		1	2	2	1	2	2	0	346	0	58.41	83.95	3	2	2	2	0	0	0	0	0	0	2		0	0	2	0	1900-01-02	2	2	1	2014-07-01	372	3	2009-03-19
S128	1	2009-03-04	2012-10-01	50	154	39	16.44	3TC+D4T30+NVP	1	1	0	0	2		1	2	2	1	2	2	0	324	0	61.06	70.71	4	9	9	1	2	2	1	2	2	2	2		0	0	2	0	1900-01-02	2	2	1	2014-07-01	638	3	2009-03-04
S135	1	2009-05-07	2012-12-21	33	167	60	21.51	3TC+D4T30+NVP	1	1	0	0	2		1	2	2	1	2	2	9	178	0	118.82	66.46	4	2	9	1	2	2	1	2	2	2	2		0	0	2	0	1900-01-02	2	2	1	2014-07-01	557	2	2009-05-29
S137	0	2009-05-22	2012-12-06	41	152	53	22.94	3TC+D4T30+NVP	1	1	1	0	2		1	2	2	1	2	2	0	641	0	77.88	70.07	4	2	2	2	0	0	0	0	0	0	2		0	0	2	0	1900-01-02	2	2	1	2014-07-01	572	3	2009-05-22
S140	0	2009-07-08	2013-01-29	41	154	54	22.77	3TC+D4T30+NVP	1	1	0	0	2		1	2	2	1	2	2	1	251	0	67.26	82.66	3	1	9	1	2	2	1	2	2	2	2		0	0	2	0	1900-01-02	2	2	1	2014-07-01	518	3	2009-07-17
S141	1	2009-07-16	2013-11-19	37	161	59	22.76	3TC+D4T30+NVP	1	1	0	0	2		1	2	2	1	2	2	0	484	0	92.92	80.44	4	9	9	2	0	0	0	0	0	0	2		0	0	2	0	1900-01-02	2	2	1	2014-07-01	224	3	2009-08-20
S149	0	2009-10-07	2013-08-15	34	157	49	19.88	3TC+D4T30+NVP	1	1	0	0	2		1	2	2	1	2	2	0	425	0	95.6	56.5	3	9	9	2	0	0	0	0	0	0	2		0	0	2	0	1900-01-02	2	2	1	2014-07-01	320	3	2009-10-07
S15	0	2005-12-19	2013-03-27	36	159	53	20.96	3TC+D4T30+NVP	1	1	0	0	2		1	2	2	1	2	2	0	608	0	64.61	88.72	3	2	9	2	0	0	0	0	0	0	2		0	0	2	0	1900-01-02	2	2	1	2014-07-01	461	3	2005-12-19
S152	1	2009-10-29	2013-11-25	33	164	58	21.56	3TC+D4T30+NVP	1	1	0	0	2		2	0	0	0	0	0	0	243	0	76.99	99.15	3	9	9	2	0	0	0	0	0	0	2		0	0	2	0	1900-01-02	2	2	1	2014-07-01	218	3	2010-06-23
S154	1	2009-12-09	2013-05-27	38	164	50	18.59	3TC+D4T30+NVP	1	1	0	0	2		1	2	2	1	2	2	9	485	0	73.45	85.41	3	2	2	2	0	0	0	0	0	0	2		0	0	2	0	1900-01-02	2	2	1	2014-07-01	400	3	2009-12-11
S155	0	2009-12-09	2012-09-27	36	152	47	20.34	3TC+D4T30+NVP	1	1	0	0	2		1	2	2	1	1	2	0	358	0	90.27	56.31	3	2	9	2	0	0	0	0	0	0	2		0	0	2	0	1900-01-02	2	2	1	2014-07-01	642	3	2009-12-11
S156	0	2009-12-21	2013-01-22	35	151	53	23.24	3TC+D4T30+NVP	1	1	1	0	2		1	2	2	1	2	2	9	395	0	57.52	100.62	4	9	9	2	0	0	0	0	0	0	2		0	0	2	0	1900-01-02	2	2	1	2014-07-01	525	3	2010-01-08
S159	0	2010-02-08	2013-10-24	37	147	47	21.75	3TC+EFV600+TDF	0	2	1	0	2		2	0	0	0	0	0	0	462	9999999	57.52	87.53	2	2	9	2	0	0	0	0	0	0	2		0	0	2	0	1900-01-02	2	2	1	2014-07-01	250	3	2010-02-07
S160	1	2010-03-08	2012-07-23	33	160	54	21.09	3TC+D4T30+EFV600	1	1	0	0	2		1	2	2	1	2	2	9	72	0	92.04	77.22	4	9	9	1	2	2	1	2	2	2	2		0	0	2	0	1900-01-02	2	2	1	2014-07-01	708	1	2010-03-08
S163	0	2010-05-10	2012-11-22	41	157	69	27.99	3TC+D4T30+NVP	1	1	0	0	2		1	2	2	1	2	2	9	415	80	100	71.04	3	2	9	1	2	2	1	2	2	2	2		0	0	2	0	1900-01-02	2	1	3	2014-02-13	448	3	2010-05-13
S3	1	2005-08-31	2012-02-08	35	155	44	18.31	3TC+D4T30+NVP	1	1	0	0	2		1	2	2	1	2	2	0	854	9999999	77.88	72.97	3	2	9	2	0	0	0	0	0	0	2		0	0	2	0	1900-01-02	2	2	1	2014-07-01	874	3	2005-11-28
S30	0	2006-06-05	2013-09-16	61	149	49	22.07	3TC+D4T30+NVP	1	1	0	0	2		1	2	2	1	2	2	0	531	0	47.79	84.24	3	2	9	2	0	0	0	0	0	0	2		0	0	2	0	1900-01-02	2	2	1	2014-07-01	288	3	2006-06-05
S31	0	2006-07-10	2013-10-09	41	154	47	19.82	3TC+D4T30+NVP	1	1	0	0	2		1	2	2	1	2	2	0	616	0	61.95	78.11	3	2	9	1	2	2	1	2	2	2	2		0	0	2	0	1900-01-02	2	2	1	2014-07-01	265	3	2006-07-10
S37	0	2006-08-07	2012-09-20	37	159	69	27.29	3TC+D4T30+NVP	1	1	0	0	2		1	2	2	1	2	2	9	326	0	100.77	73.35	3	9	9	1	2	2	1	2	2	2	2		0	0	2	0	1900-01-02	2	2	1	2014-07-01	649	3	2006-08-07
S40	1	2006-11-13	2013-08-22	35	158	43	17.22	3TC+D4T30+EFV600	1	1	0	0	2		1	2	2	1	2	2	0	728	0	93.8	59.21	3	9	9	2	0	0	0	0	0	0	2		0	0	2	0	1900-01-02	2	2	2	2014-01-11	142	3	2006-11-13
S41	1	2006-11-20	2013-06-20	44	163	63	23.71	3TC+D4T30+NVP	1	2	0	0	2		1	2	2	1	2	2	0	625	0	103.54	71.85	2	9	9	2	0	0	0	0	0	0	2		0	0	2	0	1900-01-02	2	2	1	2014-07-01	376	3	2006-11-20
S43	0	2007-02-19	2013-01-16	35	160	55	21.48	3TC+D4T30+NVP	1	1	0	0	2		1	2	2	1	2	2	1	717	0	54	111.22	4	1	1	2	0	0	0	0	0	0	2		0	0	2	0	1900-01-02	2	2	1	2014-07-01	531	3	2007-02-19
S48	1	2007-03-27	2013-03-27	47	171	73	24.96	3TC+D4T30+NVP	1	1	0	0	2		1	2	2	1	2	2	0	375	0	93.81	89.01	3	9	9	2	0	0	0	0	0	0	2		0	0	2	0	1900-01-02	2	2	1	2014-07-01	461	3	2007-03-27
S49	1	2007-05-25	2012-08-03	47	165	54	19.83	3TC+D4T30+EFV600	1	1	0	0	2		1	2	2	1	2	2	0	688	0	90	68.63	4	9	2	2	0	0	0	0	0	0	2		0	0	2	0	1900-01-02	2	2	1	2014-07-01	697	3	2007-05-25
S58	0	2007-09-04	2013-05-02	40	155	47	19.56	3TC+D4T30+NVP	1	1	1	0	2		1	2	2	1	2	2	0	427	0	74.34	65.75	4	2	9	2	0	0	0	0	0	0	2		0	1	2	0	1900-01-02	2	2	1	2014-07-01	425	3	2007-09-04
S62	0	2007-09-24	2013-09-19	44	148	88	40.18	3TC+D4T30+NVP	1	1	1	0	2		1	2	2	1	1	2	0	1095	0	100.89	87.08	2	2	1	2	0	0	0	0	0	0	2		1	1	2	0	1900-01-02	2	2	1	2014-07-01	285	3	2007-10-22
S64	0	2007-10-01	2013-05-27	33	158	54	21.63	3TC+D4T30+EFV600	1	1	0	0	2		2	0	0	0	0	0	0	718	0	58.41	102.88	4	2	9	2	0	0	0	0	0	0	2		0	0	2	0	1900-01-02	2	2	1	2014-07-01	400	3	2007-10-01
S65	1	2007-10-09	2013-10-22	50	161	52	20.06	3TC+D4T30+NVP	1	1	0	0	2		1	2	2	1	1	2	0	417	0	74.34	77.43	4	9	9	2	0	0	0	0	0	0	2		0	0	2	0	1900-01-02	2	2	1	2014-07-01	252	3	2007-10-08
S67	1	2007-10-10	2013-05-23	45	157	54	21.91	3TC+D4T30+NVP	1	1	0	0	2		1	2	2	1	2	2	1	386	0	67.26	93.81	3	1	9	2	0	0	0	0	0	0	2		0	0	2	0	1900-01-02	2	2	1	2014-07-01	404	3	2007-10-10
S71	1	2007-10-23	2013-12-18	40	173	68	22.72	3TC+D4T30+NVP	1	1	0	0	2		1	2	2	1	2	2	0	344	0	81.42	102.73	4	2	1	2	0	0	0	0	0	0	2		0	0	2	0	1900-01-02	2	2	1	2014-07-01	195	3	2007-10-23
S75	1	2007-11-21	2013-05-07	44	158	42	16.82	3TC+D4T30+NVP	1	1	0	0	2		1	2	2	1	2	2	0	117	9999999	89	55.72	3	9	9	1	2	2	1	2	2	2	2		0	0	2	0	1900-01-02	1	2	4	2013-06-05	29	2	2007-11-21
S80	1	2008-01-15	2012-09-28	32	165	48	17.63	3TC+D4T30+EFV600	1	1	0	0	2		1	2	2	1	2	2	9	408	0	115.05	55.42	3	9	9	2	0	0	0	0	0	0	2		0	0	2	0	1900-01-02	2	2	1	2014-07-01	641	3	2008-01-15
S93	0	2008-04-03	2013-09-09	42	147	52	24.06	3TC+EFV600+TDF	1	2	0	0	2		1	2	2	1	2	2	0	330	9999999	85.85	61.73	2	2	9	1	2	2	1	2	2	2	2		0	0	2	0	1900-01-02	2	2	2	2013-09-23	14	3	2008-04-11
S94	1	2008-04-29	2012-03-06	40	170	44	15.22	3TC+D4T30+NVP	1	1	0	0	2		1	2	2	1	2	2	9	585	9999999	79	68.51	4	2	9	2	0	0	0	0	0	0	2		0	0	2	0	1900-01-02	2	2	1	2014-07-01	847	3	2008-05-01
S95	1	2008-05-05	2013-03-28	41	162	53	20.2	3TC+D4T30+NVP	1	1	0	0	2		1	2	2	1	2	2	0	230	0	60.18	107.24	3	2	1	1	2	2	1	2	2	2	2		0	0	2	0	1900-01-02	2	2	1	2014-07-01	460	3	2008-05-09
S99	0	2008-05-26	2013-08-29	38	156	54	22.19	3TC+D4T30+NVP	1	1	0	0	2		1	2	2	1	2	2	0	969	0	70.8	80.91	3	2	9	1	2	2	1	2	2	2	2		0	0	2	0	1900-01-02	2	2	1	2014-07-01	306	3	2008-05-08
[truncated: 99 more columns]
